# Supplementary material
Source: MDPI journal article supplement (https://www.mdpi.com/2073-4344/11/9/1134)

# Organocatalytic asymmetric Michael addition in aqueous media by a hydrogen-bonding catalyst and application for inhibitors of GABA<sub>B</sub> receptor

Jae Ho Shim,<sup>\*a</sup> Yeonsun Hong,<sup>b</sup> Ji Hae Kim,<sup>a</sup> Hyeon Soo Kim<sup>\*a</sup> and Deok-Chan Ha<sup>\*c</sup>

*a* Department of Anatomy, Korea University College of Medicine, 126-1, Anam-dong 5-ga, Seongbuk-gu, Seoul, Republic of Korea  
e-mail: shimjh3000@korea.ac.kr

*b* Department of Microbiology and Immunology, David H. Smith Center for Vaccine Biology and Immunology, University of Rochester, Rochester, NY, USA  
e-mail: yeonsun\_hong@urmc.rochester.edu

*c* Department of Chemistry, Korea University College of Science, Anam-ro, Seongbuk-gu, Seoul 136701, Republic of Korea  
e-mail: dechha@korea.ac.kr

## Supporting Information

### Table of Contents

|                                                                              |       |
|------------------------------------------------------------------------------|-------|
| General Information .....                                                    | S-2   |
| Synthesis of catalysts (1a-n); general procedure.....                        | S-2   |
| Compound Characterization Data.....                                          | S-7   |
| References.....                                                              | S-21  |
| Copy of HPLC Chromatograms.....                                              | S-22  |
| Copy of NMR Spectra .....                                                    | S-51  |
| Computational Results of DFT Calculations for all Calculated Structures..... | S-87  |
| Copy of X-ray Diffraction(1m Catalyst).....                                  | S-113 |

## General information

IR spectra were recorded on a NICOLET 380 FT-IR spectrophotometer. Optical rotations were measured with a Rudolph Automatic polarimeter (model name: A20766 APV/6w).  $^1\text{H}$  NMR spectra were recorded on a Varian Mercury 400 (400 MHz) or Varian Germini 300 (300 MHz) with TMS as an internal reference.  $^{13}\text{C}$  NMR spectra were recorded on a Varian Mercury 400 (100 MHz) with TMS or  $\text{CDCl}_3$  as an internal reference. Chiral HPLC analysis was performed on a Jasco LC-1500 Series HPLC system with a UV detector. All reactions were carried out in oven-dried glassware under an argon atmosphere. Toluene ( $\text{CaH}_2$ ), THF (Na, benzophenone) were dried by distillation before use. Commercial grade reagents and solvents were used without further purification. Liquid reagents were freshly distilled under an atmosphere of dry argon, and solid reagents were purified by flash chromatography on silica gel.

## Reagents

The fluorescent  $\text{Ca}^{2+}$  indicator Fluo-3 AM was purchased from Invitrogen (Leiden, the Netherlands). Cell Counting Kit-8 (CCK-8) solution was obtained from Dojindo Molecular Technologies.

## Cell culture

HEK293T was maintained in Dulbecco's modified Eagle's medium (DMEM; Invitrogen) supplemented with 10% fetal bovine serum (FBS) and 1% antibiotics at 37 °C in 100-mm cell culture dishes (Corning, NY, USA), under a humidified air atmosphere containing 5%  $\text{CO}_2$ .

## Cytotoxicity analysis

HEK293T cells ( $1 \times 10^4$  cells/well) were seeded in a 96-well plate. The next day, cells were treated with compounds (10-fold, 6 points) and incubated for 24 h, 48 h, and 72 h. Cells were then added to Cell Counting Kit-8 (CCK-8) solution (Dojindo Molecular Technologies, Inc) following the manufacturer's procedure. The absorbance was detected at 450 nm via a microplate reader (Spectra MAX 340, Molecular Devices). The data was analyzed through Prism software (GraphPad).

## Intracellular $\text{Ca}^{2+}$ measurements using confocal laser scanning microscopy (CLSM)

To detect intracellular  $\text{Ca}^{2+}$  level, HEK293T cells were seeded and incubated to 40–60% confluence in a 35 mm diameter confocal dish 24 h prior to the experiment. The cells were loaded with 5 mM of the fluorescent radiometric calcium indicator Fluo-3-AM (Invitrogen) for 30 min at 37 °C. The  $\text{Ca}^{2+}$  concentration was determined using CLSM (Zeiss LSM 700 Meta; Zeiss, Oberkochen, Germany). After washing with the medium, the culture plates were placed on a temperature-controlled microscope stage and observed under 200 $\times$  microscope magnification. The excitation and emission wavelengths for signal detection were 488 and 515 nm, respectively. The intensity analysis of intracellular calcium was performed using Zen software (Carl Zeiss).

## Synthesis of catalysts (1a-n); general procedure

## 1. Synthesis of monoalkylated thiourea catalysts.

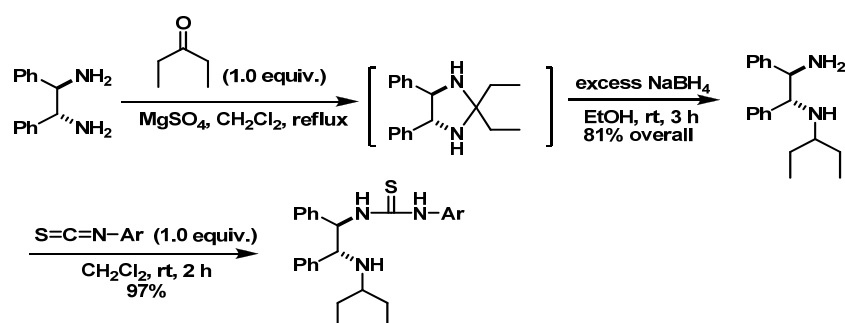

Scheme 1.

To a suspension of (*R, R*)-1,2-diphenylethylenediamine (1.0 equiv.) in toluene (0.1 M) was added a solution of 3-pentanone (1.1 equiv.),  $\text{MgSO}_4$  and the mixture was reflux for 48h. then remove the  $\text{MgSO}_4$  to celite filter and concentrated in vacuo.  $\text{NaBH}_4$  (4.0 equiv.) and ethanol was added, and the mixture was stirred at room temperature for 1h. quenched with 1*N* NaOH solution, and the mixture was extracted with ethyl acetate. The combined organic extracts were washed with brine, dried ( $\text{MgSO}_4$ ), and concentrated in vacuo. The product was purified by chromatography on a silica-gel column (methanol/methylene chloride 1:20). The monoalkylated DPEN (1.0 equiv.) in  $\text{CH}_2\text{Cl}_2$  (0.1 M) was added thiourea (1.1 equiv.) and the mixture was stirred at room temperature for 1h. purified by flash column chromatography on silica gel with ethyl acetate/hexanes (1:5) to give the pure amide product(quantitative yield) as a white foamy solid.

## 2. Synthesis of arylated thiourea catalysts.

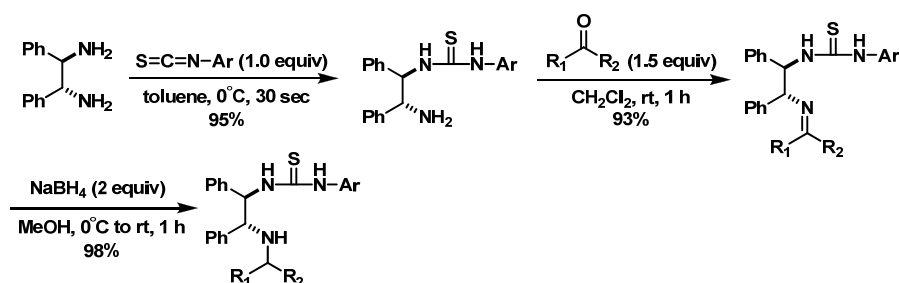

Scheme 2.

To a suspension of (*R, R*)-1,2-diphenylethylenediamine (1.0 equiv.) in toluene (0.5 M) was added thiourea (1.0 equiv.) at  $0^\circ\text{C}$  and the mixture was stirred for 30 sec. the product was concentrated in vacuo and purified by flash column chromatography on silica gel with ethyl (methanol/methylene chloride 1:20). The thiourea substituted DPEN (1.0 equiv.) in  $\text{CH}_2\text{Cl}_2$  (0.1 M) was added aryl ketone (1.1 equiv.) and the mixture was stirred at room temperature for 1h.  $\text{NaBH}_4$  (2.0 equiv.) and ethanol was added at  $0^\circ\text{C}$  and the mixture was stirred at room temperature for 1h. The product celite filter and the mixture were extracted with ethyl acetate. The combined organic extracts were washed with brine, dried ( $\text{MgSO}_4$ ), and concentrated in vacuo. The product was purified by chromatography on a silica-gel column (methanol/methylene chloride 1:20) to give the pure amide product(quantitative yield) as a brown foamy solid.

## 3. Synthesis of product compounds.

## (1) General procedure for the asymmetric Michael reaction

The trans- $\beta$ -nitrostyrene (1.0 equiv.), malononitrile (2.0 equiv.), and 10~1 mol% of catalyst were added in the water (0.4 ml), and the reaction mixture was stirred at rt. The reaction conversion was monitored by TLC. After completion, 6 N HCl was added, and the mixture was heated to 100 °C for 6 h. After cooling the reaction mixture to room temperature, added dialkyl carbonate (1.5 equiv.) and the solution was heated under magnetic stirring at 100°C for 3 h, on cooling the homogeneous reaction mixture to room temperature. The reaction mixture was poured into 10% aq NaHCO<sub>3</sub> under stirring. Ethyl acetate (0.2ml) was added to the reaction mixture. This solution was washed twice with water (2×1.0 mL), dried over magnesium sulfate, and concentrated to yield the desired product. The product was purified by chromatography on a silica-gel column (hexane/methylene chloride 2:1).

**Table S1.** Catalyst screening.

| Entry | Cat.      | Yield[%] <sup>a)</sup> | ee[%] <sup>b)</sup> |
|-------|-----------|------------------------|---------------------|
| 1     | <b>1a</b> | -                      | -                   |
| 2     | <b>1b</b> | -                      | -                   |
| 3     | <b>1c</b> | 44                     | 53                  |
| 4     | <b>1d</b> | 85                     | 90                  |
| 5     | <b>1e</b> | 67                     | 72                  |
| 6     | <b>1f</b> | 86                     | 78                  |
| 7     | <b>1g</b> | 64                     | 74                  |
| 8     | <b>1h</b> | 65                     | 74                  |
| 9     | <b>1i</b> | 51                     | 52                  |

<sup>a)</sup> Isolated yield; <sup>b)</sup> Determined by chiral HPLC using an AD-H column.

**Table S2.** Catalyst effects on the Michael reaction.

| Entry | R  | Solvent <sup>a)</sup> | Cat.      | Time[hour] <sup>[3]</sup> | Yield [%] <sup>b)</sup> | ee [%] <sup>c)</sup> |
|-------|----|-----------------------|-----------|---------------------------|-------------------------|----------------------|
| 1     | Me | water                 | <b>1d</b> | 14                        | 97                      | 99                   |
| 2     | Me | toluene               | <b>1d</b> | 96                        | 89                      | 80                   |
| 3     | Me | water                 | <b>1j</b> | 10                        | 98                      | 99                   |
| 4     | Me | water                 | <b>1k</b> | 19                        | 95                      | 94                   |
| 5     | Et | water                 | <b>1j</b> | 12                        | 97                      | 99                   |
| 6     | Et | toluene               | <b>1j</b> | 96                        | 81                      | 80                   |
| 7     | Et | water                 | <b>1l</b> | 12                        | 81                      | 94                   |
| 8     | Et | toluene               | <b>1l</b> | 96                        | 86                      | 93                   |
| 9     | Bn | water                 | <b>1j</b> | 14                        | 93                      | 98                   |
| 10    | Bn | water                 | <b>1k</b> | 26                        | 91                      | 98                   |

a) Using 0.4 mL solvent on a 0.1 mmol scale; b) Isolated yield; c) Determined by chiral HPLC.

**Table S3.** Substrate effects of malonate.
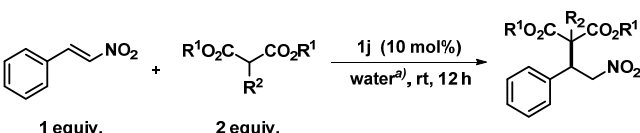

| Entry           | R <sub>1</sub> | R <sub>2</sub> | additive [mol%]          | Yield [%] <sup>b)</sup> | ee [%] <sup>c)</sup> |
|-----------------|----------------|----------------|--------------------------|-------------------------|----------------------|
| 1 <sup>d)</sup> | Et             | H              | Et <sub>3</sub> N [10]   | 97                      | 10                   |
| 2 <sup>e)</sup> | Et             | H              | Et <sub>3</sub> N [5]    | 98                      | 50                   |
| 3 <sup>f)</sup> | Et             | H              | PhCO <sub>2</sub> H [10] | 99                      | 99                   |
| 4               | <i>n</i> -Bu   | H              | -                        | 92                      | 99                   |
| 5               | <i>n</i> -Pr   | H              | -                        | 95                      | 99                   |

a) Using 0.4 mL water on a 0.1 mmol scale; b) Isolated yield; c) Determined by chiral HPLC; d) The reaction was run for 15 min; e) The reaction was run for 1 h; f) The reaction was run for 3 h.

**Table S4.** Catalyst effects on the Michael reaction.
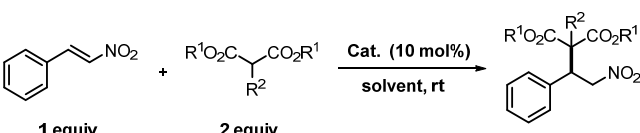

| Entry           | R <sub>1</sub> | R <sub>2</sub> | Solvent <sup>a)</sup> | Cat.      | Time [min] <sup>[3]</sup> | Yield [%] <sup>b)</sup> | ee [%] <sup>c)</sup> |
|-----------------|----------------|----------------|-----------------------|-----------|---------------------------|-------------------------|----------------------|
| 1               | Et             | H              | -                     | <b>1m</b> | 60                        | 97                      | 91                   |
| 2               | Et             | H              | -                     | <b>1n</b> | 60                        | 95                      | 99                   |
| 3               | Et             | H              | water                 | <b>1m</b> | 5                         | 99                      | 99                   |
| 4 <sup>d)</sup> | Et             | Et             | water                 | <b>1m</b> | 30                        | 95                      | 99                   |
| 5               | Et             | H              | water                 | <b>1n</b> | 60                        | 96                      | 90                   |
| 6               | Bn             | H              | water                 | <b>1m</b> | 15                        | 94                      | 99                   |
| 7               | Bn             | H              | water                 | <b>1n</b> | 60                        | 92                      | 99                   |

a) Using 0.4 mL solvent on the 0.1 mmol scale; b) Isolated yield; c) Determined by chiral HPLC; d) The reaction was run using 1 mol% of catalyst.

## (2) General Procedure of the Asymmetric Michael reaction

Trans- $\beta$ -nitrostyrene (27 mmol, 1.0 equiv.), the desired ester (54 mmol, 2.0 equiv.), and catalyst (10~1 mol%) was added to water (50 mL), and the reaction mixture was stirred at rt. The reaction conversion was monitored by TLC. Upon completion of the reaction, ethyl acetate (20 mL) was added to the reaction mixture, and the obtained solution was washed twice with water (2×10 mL), dried over anhydrous magnesium sulfate, filtered, and concentrated to yield the desired product. Each product was purified via column chromatography on a silica-gel column using hexane/methylene chloride (2:1) as the eluent.

## 4. Synthesis of baclofen, phenibut

Under argon atmosphere, to the suspension of 2b, 2h, 3a, 3d (1.0 equiv, 99% ee) and NiCl<sub>2</sub>·6H<sub>2</sub>O (1.0 equiv) in MeOH (8.0 ml) was added NaBH<sub>4</sub> (10 equiv) at 0 °C. After the reaction mixture was stirred 7.5 h at rt, the reaction mixture was quenched with NH<sub>4</sub>Cl and diluted with CHCl<sub>3</sub>. The

organic layer was separated and dried over  $\text{MgSO}_4$ , filtrated and concentrated in vacuo. The residue was purified by column chromatography on silica gel ( $\text{MeOH}/\text{CHCl}_3 = 1/20$  as eluent) to afford desired product 2n, 2o (94%) as a colorless powder. Product 2n, 2o (1.0 equiv) in 6N HCl (2.7 ml) was refluxed at 100 °C. After 12 h, the reaction mixture was concentrated in vacuo to afford (R)-baclofen, Phenibut (97~98%) as colorless solid.

## 5. Synthesis of phenyl-piracetam

The solution of 4-phenyl-2-pyrrolidinone (1.0 eq.) in 1,4-dioxane (30 ml) was added to the suspension of sodium hydride (1.1 eq.) in 1,4-dioxane (30 ml). The mixture was heated at 90°C for 30 min and then cooled to room temperature. Ethyl bromoacetate (1.1 eq.) was added, and the reaction mixture was refluxed at 120°C for 6 hours. The obtained mixture was concentrated under reduced pressure. The residue was purified by column chromatography on silica gel with ethylacetate-hexane mixture 1:1, giving N-ethoxy carbonyl methyl-4-phenyl-2-pyrrolidinone. The solution of N-ethoxy carbonyl methyl-4-phenyl-2-pyrrolidinone (250 mg, 1.01 mM) in methanol (30 ml) saturated by a stream of gaseous ammonia for 5 hours. The reaction mixture was concentrated under reduced pressure, and the residue was purified by column chromatography with ethylacetate-hexane mixture 1:1 silica gel giving N-carbamoyl methyl-4-phenyl-2-pyrrolidinone (5e, 5f) (85%).

## Compound Characterization Data

### 1-[(1*R*,2*R*)-2-Amino-1,2-diphenylethyl]-3-phenylthiourea (1a)

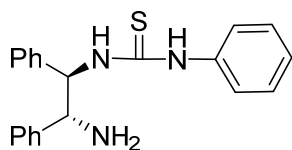

94% yield;  $[\alpha]_{\text{D}}^{20} = +62.0$  ( $c = 0.02$ ,  $\text{CH}_2\text{Cl}_2$ );  $^1\text{H}$  NMR (300 MHz,  $\text{CDCl}_3$ )  $\delta$  7.76 (s, 1 H), 7.54~7.19 (m, 15 H), 5.54 (s, 1 H), 4.42 (d, 1 H,  $J = 5$  Hz), 1.35 (br s, 1 H);  $^{13}\text{C}$  NMR (100 MHz,  $\text{DMSO}-d_6$ )  $\delta$  182.09, 134.48, 133.93, 129.89, 128.70, 128.10, 127.91, 127.15, 126.94, 126.82, 126.74, 126.23, 125.59, 125.24, 122.98, 63.07, 59.09; IR (KBr) 3287.86, 3027.84, 1521.63, 1241.99, 1072.28, 939.20, 698.13  $\text{cm}^{-1}$ ; HRMS (FAB $^+$ ) for  $\text{C}_{21}\text{H}_{22}\text{N}_3\text{S}$   $[\text{M}+\text{H}]^+$  Calcd: 348.1534, Found: 348.1530.

### 1-[(1*R*,2*R*)-2-Amino-1,2-diphenylethyl]-3-[3,5-Bis(trifluoromethyl)phenyl]thiourea (1b)

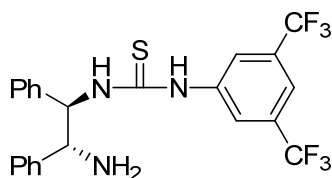

94% yield;  $[\alpha]_{\text{D}}^{25} +13.5$  ( $c$  1.00,  $\text{CH}_3\text{Cl}$ );  $^1\text{H}$  NMR (300 MHz,  $\text{DMSO}-d_6$ )  $\delta$  10.70 (s, 1H), 8.32 (s, 2H), 7.71 (s, 1H), 7.22~7.43 (m, 13H), 5.57 (d,  $J = 3$  Hz, 1H), 4.44 (d,  $J = 3$  Hz, 1H) ppm;  $^{13}\text{C}$  NMR (100 MHz,  $\text{DMSO}-d_6$ )  $\delta$  180.80, 143.41, 142.67, 130.94, 130.62, 128.81, 128.61, 127.75, 127.57, 127.51, 125.25, 122.54, 121.68, 116.40, 63.86, 60.06 ppm; IR (KBr) 3305, 3032, 2963, 1652, 1601, 1557, 1383, 1277, 1262, 803, 700  $\text{cm}^{-1}$ ; HRMS (FAB $^+$ ) for  $\text{C}_{22}\text{H}_{20}\text{N}_4\text{S}$   $[\text{M}+\text{H}]^+$  Calcd: 372.1487, Found: 372.1456

### 1-[(1*R*,2*R*)-2-(Pentan-3-ylamino)-1,2-diphenylethyl]-3-(*p*-tolyl)thiourea (1c)

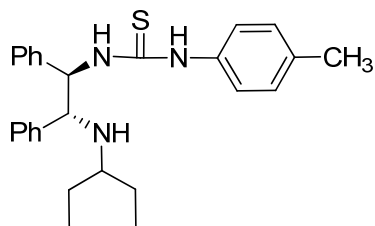

86% yield;  $[\alpha]_{\text{D}}^{20} = +0.19$  ( $c = 1.00$ ,  $\text{CH}_2\text{Cl}_2$ );  $^1\text{H}$  NMR (300 MHz,  $\text{DMSO}-d_6$ )  $\delta$  9.76 (s, 1 H), 7.89 (d,  $J = 7.0$  Hz, 1 H), 7.32~7.18 (m, 14 H), 5.44 (s, 1 H), 4.08 (d,  $J = 5.1$  Hz, 1 H), 2.29 (s, 2 H), 2.02 (s, 1 H), 1.39 (s, 1 H), 1.20~1.06 (m, 4 H), 0.68 (t,  $J = 7.5$  Hz, 3 H), 0.41 (t,  $J = 7.1$  Hz, 3 H);  $^{13}\text{C}$  NMR (100 MHz,  $\text{DMSO}-d_6$ )  $\delta$  181.04, 141.83, 141.55, 136.71, 134.88, 130.03, 128.67, 128.51, 127.49, 127.40, 124.67, 64.28, 63.77, 55.84, 26.71, 24.02, 21.20, 10.94, 8.30; IR (KBr) 3180.2, 2958.4, 1948.8, 1510.1, 1240.1, 821.6, 700.1, 565.1  $\text{cm}^{-1}$ ; HRMS (FAB $^+$ ) for  $\text{C}_{27}\text{H}_{34}\text{N}_3\text{S}$   $[\text{M}+\text{H}]^+$  Calcd: 432.2473, Found: 432.2460

### 1-[3,5-Bis(trifluoromethyl)phenyl]-3-[(1*R*,2*R*)-2-(pentan-3-ylamino)-1,2-diphenylethyl]thiourea (1d)

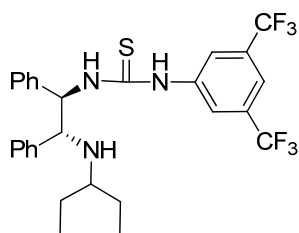

90% yield;  $[\alpha]_D^{20} = +0.31$  ( $c = 0.11$ ,  $\text{CH}_2\text{Cl}_2$ );  $^1\text{H}$  NMR (300 MHz,  $\text{DMSO}-d_6$ )  $\delta$  10.5 (br, 1 H), 8.30 (s, 2 H), 7.74 (s, 1 H), 7.40~7.19 (m, 10 H), 5.57 (br, 1 H), 4.18 (d,  $J = 4.9$  Hz, 1 H), 2.09 (m, 1 H), 1.24~1.20 (m, 4 H), 0.75 (t,  $J = 7.1$  Hz, 3 H), 0.50 (t,  $J = 6.0$  Hz, 3 H);  $^{13}\text{C}$  NMR (100 MHz,  $\text{DMSO}-d_6$ )  $\delta$  181.10, 142.49, 140.88, 130.96, 130.64, 128.70, 128.59, 128.56, 127.60, 125.22, 122.52, 122.19, 116.70, 64.34, 63.62, 56.48, 26.64, 23.90, 10.98, 8.54; IR (KBr) 3239.9, 2964.2, 1471.5, 1278.6, 1135.9, 885.2, 700.1  $\text{cm}^{-1}$ ; HRMS (FAB $^+$ ) for  $\text{C}_{28}\text{H}_{30}\text{F}_6\text{N}_3\text{S}$   $[\text{M}+\text{H}]^+$  Calcd: 554.2065, Found: 554.2065

**1-[(1R,2R)-2-(Pentan-3-ylamino)-1,2-diphenylethyl]-3-[4-(trifluoromethyl) phenyl]thiourea (1e)**

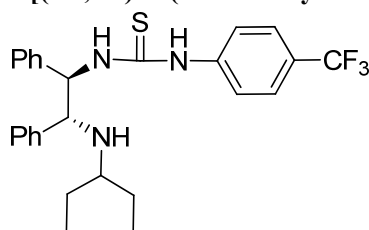

88% yield;  $[\alpha]_D^{20} = +45.5$  ( $c = 0.02$ ,  $\text{CH}_2\text{Cl}_2$ );  $^1\text{H}$  NMR (300 MHz,  $\text{DMSO}-d_6$ )  $\delta$  10.2 (br s, 1H), 8.41 (br s, 1H), 7.79 (d,  $J = 8.0$  Hz, 2H), 7.64 (d,  $J = 8.5$  Hz, 2H), 7.35~7.15 (m, 10H), 5.53 (br s, 1H), 4.13 (d,  $J = 5.5$  Hz, 1H), 2.07 (m, 1H), 1.30~1.15 (m, 4H), 0.73 (t,  $J = 7.1$  Hz, 3H), 0.49 (t,  $J = 6.9$  Hz, 3H);  $^{13}\text{C}$  NMR (100 MHz,  $\text{DMSO}-d_6$ )  $\delta$  180.91, 143.97, 141.18, 128.64, 128.52, 127.69, 127.48, 126.29, 122.41, 64.43, 63.71, 56.32, 26.68, 23.98, 10.98, 8.53; IR (KBr) 3205.3, 2962.3, 1945.9, 1741.5, 1517.8, 1324.9, 1245.9, 1066.5, 840.9, 700.1, 597.9  $\text{cm}^{-1}$ ; HRMS (FAB $^+$ ) for  $\text{C}_{27}\text{H}_{31}\text{F}_3\text{N}_3\text{S}$   $[\text{M}+\text{H}]^+$  Calcd: 486.2191, Found: 486.2190.

**1-[(1R,2R)-2-(Pentan-3-ylamino)-1,2-diphenylethyl]-3-(perfluorophenyl)thiourea (1f)**

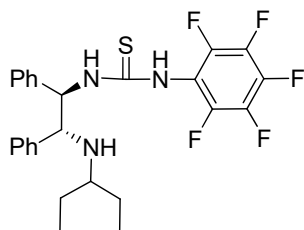

89% yield;  $[\alpha]_D^{20} = +80.4$  ( $c = 0.02$ ,  $\text{CH}_2\text{Cl}_2$ );  $^1\text{H}$  NMR (300 MHz,  $\text{DMSO}-d_6$ )  $\delta$  9.47 (s, 1 H), 8.61 (s, 1 H), 7.30~7.15 (m, 10 H), 5.48 (br s, 1 H), 4.13 (d,  $J = 6.1$  Hz, 1 H), 2.08 (m, 1 H), 1.54 (br, 1 H), 1.30~1.14 (m, 4 H), 0.74 (t,  $J = 7.4$  Hz, 3 H), 0.55 (t,  $J = 6.3$  Hz, 3 H);  $^{13}\text{C}$  NMR (100 MHz,  $\text{DMSO}-d_6$ )  $\delta$  183.63, 145.82, 143.43, 141.90, 140.77, 139.01, 138.84, 136.56, 129.39, 128.61, 128.43, 127.68, 127.60, 115.93, 64.77, 64.53, 56.37, 26.72, 24.16, 10.86, 8.58; IR (KBr) 3299.8, 2964.2, 1525.5, 1344.2, 1145.6, 991.3, 912.2, 700.1, 605.6  $\text{cm}^{-1}$ ; HRMS (FAB $^+$ ) for  $\text{C}_{26}\text{H}_{27}\text{F}_5\text{N}_3\text{S}$   $[\text{M}+\text{H}]^+$  Calcd: 508.1846, Found: 508.1848.

**1-(4-Nitrophenyl)-3-[(1R,2R)-2-(pentan-3-ylamino)-1,2-diphenylethyl]thiourea (1g)**



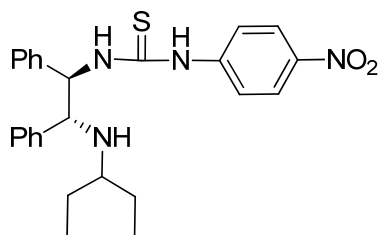

89% yield;  $[\alpha]_{\text{D}}^{20} = +37.7$  ( $c = 0.02$ ,  $\text{CH}_2\text{Cl}_2$ );  $^1\text{H}$  NMR (300 MHz,  $\text{DMSO-d}_6$ )  $\delta$  10.5 (s, 1 H), 8.16 (m, 2 H), 7.90 (d,  $J = 9.1$  Hz, 2 H), 7.37~7.15 (m, 10 H), 5.54 (br s, 1 H), 4.16 (d,  $J = 5.5$  Hz, 1 H), 2.07 (m, 1 H), 1.30~1.15 (m, 4 H), 0.75 (t,  $J = 7.4$  Hz, 3 H), 0.50 (t,  $J = 7.4$  Hz, 3 H);  $^{13}\text{C}$  NMR (100 MHz,  $\text{DMSO-d}_6$ )  $\delta$  180.51, 146.95, 142.46, 141.92, 140.92, 128.68, 128.56, 127.72, 125.16, 120.92, 64.35, 63.80, 56.35, 55.59, 26.70, 23.96, 11.03, 8.61; IR (KBr) 3330.5, 2960.2, 2599.6, 2456.4, 2345.0, 1951.6, 1743.3, 1496.5, 1346.1, 1110.8, 1072.2, 852.4, 700.0, 586.3  $\text{cm}^{-1}$ ; HRMS ( $\text{FAB}^+$ ) for  $\text{C}_{26}\text{H}_{31}\text{N}_4\text{O}_2\text{S}$   $[\text{M}+\text{H}]^+$  Calcd: 463.2168, Found: 463.2165.

#### 1-(4-Cyanophenyl)-3-[(1R,2R)-2-(pentan-3-ylamino)-1,2-diphenylethyl]thiourea (1h)

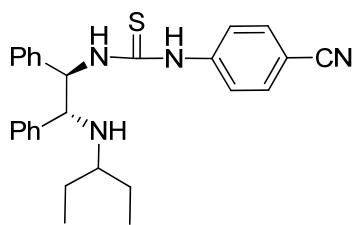

69% yield;  $[\alpha]_{\text{D}}^{20} = +55.5$  ( $c = 0.02$ ,  $\text{CH}_2\text{Cl}_2$ );  $^1\text{H}$  NMR (300 MHz,  $\text{DMSO-d}_6$ )  $\delta$  10.3 (br s, 1 H), 8.54 (br s, 1 H), 7.84~7.72 (m, 4 H), 7.35~7.17 (m, 10 H), 5.54 (br s, 1 H), 4.14 (d,  $J = 5.2$  Hz, 1 H), 2.07 (br s, 1 H), 1.56 (br s, 1 H), 1.21 (m, 4H), 0.74 (t,  $J = 7.4$  Hz, 3 H), 0.49 (t,  $J = 6.9$  Hz, 3H);  $^{13}\text{C}$  NMR (100 MHz,  $\text{DMSO-d}_6$ )  $\delta$  180.62, 144.83, 141.92, 141.05, 133.40, 128.67, 128.33, 127.68, 127.64, 127.51, 121.76, 119.76, 105.41, 64.41, 63.72, 60.43, 56.33, 26.74, 23.98, 21.42, 14.74, 11.02, 8.56; IR (KBr) 3317.0, 2960.2, 2360.4, 2225.5, 1949.7, 1739.5, 1508.1, 1315.2, 1176.4, 1072.2, 837.0, 700.0, 545.8  $\text{cm}^{-1}$ ; HRMS ( $\text{FAB}^+$ ) for  $\text{C}_{27}\text{H}_{31}\text{N}_4\text{S}$   $[\text{M}+\text{H}]^+$  Calcd: 443.2269, Found: 443.2271.

#### 1-(4-Fluorophenyl)-3-[(1R,2R)-2-(pentan-3-ylamino)-1,2-diphenylethyl]thiourea (1i)

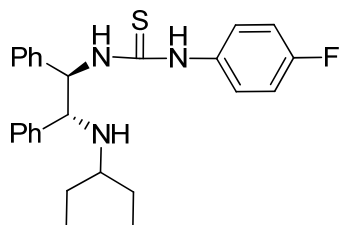

84% yield;  $[\alpha]_{\text{D}}^{20} = +17.9$  ( $c = 0.02$ ,  $\text{CH}_2\text{Cl}_2$ );  $^1\text{H}$  NMR (300 MHz,  $\text{DMSO-d}_6$ )  $\delta$  9.83 (s, 1 H), 8.00 (d,  $J = 6.7$  Hz, 1 H), 7.48~7.43 (m, 2 H), 7.31~7.16 (m, 11 H), 5.46 (br s, 1 H), 4.09 (d,  $J = 5.22$  Hz, 1 H), 2.03 (br s, 1 H), 1.44 (br s, 1 H), 1.14 (m, 4 H), 0.70 (t,  $J = 10.1$ , 3 H), 0.44 (t,  $J = 7.0$  Hz, 3 H);  $^{13}\text{C}$  NMR (100 MHz,  $\text{DMSO-d}_6$ )  $\delta$  181.42, 161.03, 158.62, 141.90, 141.44, 135.97, 128.65, 128.51, 127.57, 127.42, 126.49, 116.13, 115.90, 64.39, 63.76, 56.03, 26.72, 24.02, 10.98, 8.39; IR (KBr) 3193.7, 2962.3, 1889.9, 1511.9, 1218.8, 848.6, 701.9, 555.42  $\text{cm}^{-1}$ ; HRMS ( $\text{FAB}^+$ ) for  $\text{C}_{26}\text{H}_{31}\text{FN}_3\text{S}$   $[\text{M}+\text{H}]^+$  Calcd: 436.6172, Found: 436.2223. pattern 436.5, 349.3, 266.4, 176.3, 106.1

**1-((1R,2R)-2-(benzhydrylamino)-1,2-diphenylethyl)-3-(3,5-bis(trifluoromethyl)phenyl)thiourea (1j)**

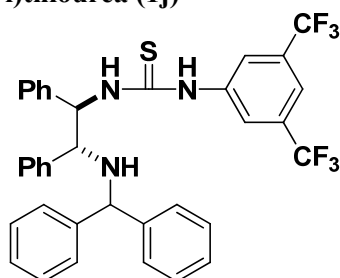

95% yield;  $[\alpha]_{\text{D}}^{20} = +0.39$  ( $c = 0.16$ ,  $\text{CH}_2\text{Cl}_2$ );  $^1\text{H}$  NMR (400 MHz,  $\text{DMSO-d}_6$ )  $\delta$  7.82~7.09 (m, 23 H), 5.72 (s, 1 H), 3.98 (s, 1 H), 3.35 (s, 1 H), 2.47 (br, 1 H);  $^{13}\text{C}$  NMR (100 MHz,  $\text{DMSO-d}_6$ )  $\delta$  181.06, 156.63, 153.35, 143.36, 142.03, 141.31, 138.68, 129.48, 129.34, 126.90, 125.59, 123.65, 122.55, 122.14, 70.83, 65.14, 55.50; IR (KBr) 3239.9, 2964.2, 1471.5, 1278.6, 1135.9, 885.2, 700.1  $\text{cm}^{-1}$ ; HRMS ( $\text{EI}^+$ ) for  $\text{C}_{28}\text{H}_{30}\text{F}_6\text{N}_3\text{S}$   $[\text{M}+\text{H}]^+$  Calcd: 649.1986, Found: 649.1932

**1-((1R,2R)-2-(benzhydrylamino)-1,2-diphenylethyl)-3-tert-butylthiourea(1k)**

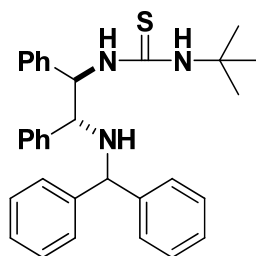

93% yield;  $[\alpha]_{\text{D}}^{20} = +115$  ( $c = 0.17$ ,  $\text{CH}_2\text{Cl}_2$ );  $^1\text{H}$  NMR (400 MHz,  $\text{DMSO-d}_6$ )  $\delta$  7.61~7.03 (m, 20H), 4.13 (q, 3H), 2.92 (s, 9H), 1.76 (br, 2H); IR(KBr) 3679.6, 2978.4, 1414.3, 1262.8, 1059.4, 886.1, 735.0  $\text{cm}^{-1}$ ; HRMS( $\text{EI}^+$ ) for  $\text{C}_{32}\text{H}_{35}\text{N}_3\text{S}$   $[\text{M}+\text{H}]^+$  Calcd: 493.2552, Found: 493.2587

**1-((1R,2R)-2-(benzhydrylamino)-1,2-diphenylethyl)-3-(4-(trifluoromethyl)phenyl)thiourea (1l)**

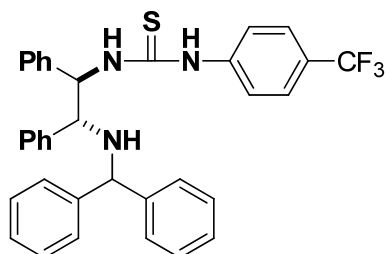

89% yield;  $[\alpha]_{\text{D}}^{20} = +124$  ( $c = 0.10$ ,  $\text{CH}_2\text{Cl}_2$ );  $^1\text{H}$  NMR (300 MHz,  $\text{DMSO-d}_6$ )  $\delta$  9.44 (br, 1H), 7.77~7.10 (m, 26H), 4.90 (s, 1H), 4.82 (s, 2H), 1.92 (s, 1H); IR(KBr) 3679.5, 3352.2, 2985.3, 1402.4, 1265.9, 1065.7, 726.8  $\text{cm}^{-1}$ ; HRMS( $\text{FAB}^+$ ) for  $\text{C}_{35}\text{H}_{30}\text{F}_3\text{N}_3\text{S}$   $[\text{M}+\text{H}]^+$  Calcd: 581.2113, Found: 581.2133

**1-((1R,2R)-2-(3,5-bis(trifluoromethyl)benzylamino)-1,2-diphenylethyl)-3-(3,5-**

**bis(trifluoromethyl)phenyl)thiourea (1m)**

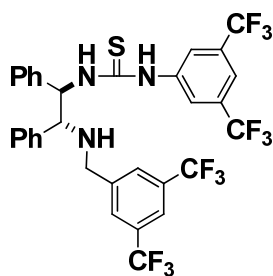

93% yield;  $[\alpha]_D^{20} = +0.45$  ( $c = 0.11$ ,  $\text{CH}_2\text{Cl}_2$ );  $^1\text{H}$  NMR (500 MHz,  $\text{DMSO-d}_6$ )  $\delta$  7.61 (br, 3 H), 7.39~7.29 (m, 16 H), 4.54 (s, 4 H);  $^{13}\text{C}$  NMR (100 MHz,  $\text{DMSO-d}_6$ )  $\delta$  171.58, 157.99, 142.12, 131.29 (q,  $J_{\text{CF}} = 33.3$  Hz), 129.17, 127.28, 125.67, 122.96, 112.29, 89.59, 89.05, 84.78;  $^{19}\text{F}$  NMR (470 MHz,  $\text{MeOH-d}_4$ )  $\delta$  64.60, 64.48, 64.38, 64.32; IR (KBr) 3032.6, 2871.3, 1663.5, 1386.6, 1275.9, 1117.5, 930.2, 700.2  $\text{cm}^{-1}$ ; HRMS (LCMS $^+$ ) for  $\text{C}_{32}\text{H}_{23}\text{F}_{12}\text{N}_3\text{S}$   $[\text{M}+\text{H}]^+$  Calcd: 709.1421, Found: 709.1428

**1-((1R,2R)-2-(3,5-dimethylbenzylamino)-1,2-diphenylethyl)-3-(3,5-dimethylphenyl)thiourea (1n)**

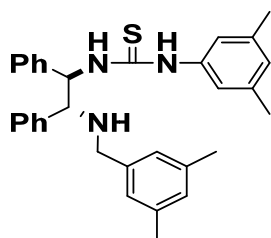

89% yield;  $[\alpha]_D^{20} = +112$  ( $c$  0.13,  $\text{CH}_2\text{Cl}_2$ );  $^1\text{H}$  NMR (500 MHz,  $\text{DMSO-d}_6$ )  $\delta$  7.38 (t, 6H), 7.32 (d, 2H), 7.27 (d, 4H), 7.00 (s, 4H), 4.54 (s, 4H), 2.21 (s, 12H), 1.25 (br, 1H);  $^{13}\text{C}$  NMR (100 MHz,  $\text{DMSO-d}_6$ )  $\delta$  167.08, 157.71, 156.95, 143.07, 138.05, 131.22, 129.00, 128.93, 127.09, 127.03, 123.43, 118.64, 112.63, 70.28, 68.05, 67.38, 21.63; IR(KBr) 3155.0, 2960.2, 2360.4, 1951.6, 1735.6, 1469.5, 1294.0, 1241.9, 1006.7, 837.0, 700.0, 572.8  $\text{cm}^{-1}$ ; HRMS(LCMS $^+$ ) for  $\text{C}_{26}\text{H}_{30}\text{F}_2\text{N}_3\text{S}$   $[\text{M}+\text{H}]^+$  Calcd: 454.2129, Found: 454.2133

**(R)-Dimethyl 2-(2-nitro-1-phenylethyl)malonate (2a)<sup>1,2</sup>**

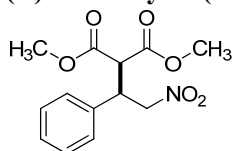

$^1\text{H}$  NMR (300 MHz,  $\text{CDCl}_3$ )  $\delta$  7.40~7.15 (m, 5H), 5.15~5.03 (m, 1H), 4.93 (dd,  $J = 4.5, 12.8$  Hz, 1H), 4.88~4.76 (m, 2H), 4.20 (td,  $J = 4.5, 9.5$  Hz, 1H), 3.76 (d,  $J = 9.5$  Hz, 1H), 1.24 (d,  $J = 6.1$  Hz, 3H), 1.07 (d,  $J = 6.4$  Hz, 3H), 1.01 (d,  $J = 6.4$  Hz, 3H) ppm;  $^{13}\text{C}$  NMR (100 MHz,  $\text{CDCl}_3$ )  $\delta$  167.1, 166.4, 136.3, 128.9, 128.3, 128.2, 77.9, 69.9, 69.5, 55.1, 42.9, 21.5, 21.4, 21.19, 21.17 ppm; IR(KBr) 3030, 2985, 1727, 1557  $\text{cm}^{-1}$ ; HRMS(ESI) for  $\text{C}_{13}\text{H}_{16}\text{N}_1\text{O}_6$   $[\text{M}+\text{H}]^+$  Calcd: 282.09721, Found: 282.09726; HPLC [Chiralcel AD-H, hexane/2-propanol = 95/5, 1.0 mL/min,  $\lambda = 254$  nm, retention times: (major) 23.3 min, (minor) 38.0 min].

**(R)-Diethyl 2-(2-nitro-1-phenylethyl)malonate (2b)<sup>1,2</sup>**

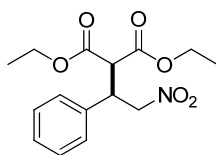

$^1\text{H}$  NMR (300 MHz,  $\text{CDCl}_3$ )  $\delta$  7.30~7.20 (m, 5H), 4.93 (dd,  $J$  = 4.6, 13.1 Hz, 1H), 4.86 (dd,  $J$  = 9.2, 13.1 Hz, 1H), 4.24~4.17 (m, 3H), 3.98~3.97 (q,  $J$  = 7.2 Hz, 2H), 3.81~3.79 (d,  $J$  = 9.5 Hz, 1H), 1.25 (t,  $J$  = 7.2 Hz, 3H), 1.03 (t,  $J$  = 7.2 Hz, 3H) ppm;  $^{13}\text{C}$  NMR (100 MHz,  $\text{CDCl}_3$ )  $\delta$  167.4, 166.7, 136.2, 128.8, 128.2, 127.9, 77.6, 62.0, 61.8, 54.9, 42.9, 13.9, 13.6 ppm; IR(KBr) 2989, 2938, 1731, 1557  $\text{cm}^{-1}$ ; HRMS(ESI) for  $\text{C}_{15}\text{H}_{20}\text{N}_1\text{O}_6[\text{M}+\text{H}]^+$  Calcd: 310.12851, Found: 310.12936; HPLC [Chiralcel AD-H, hexane/ethanol = 90/10, 1.0 mL/min,  $\lambda$  = 254 nm, retention times: (major) 11.5 min, (minor) 15.3 min].

**(*R*)-Diisopropyl 2-(2-nitro-1-phenylethyl)malonate (2c)<sup>1,3</sup>**

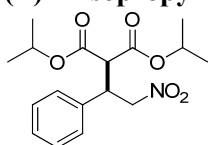

$^1\text{H}$  NMR (300 MHz,  $\text{CDCl}_3$ )  $\delta$  7.32~7.22 (m, 5H), 5.10 (dd,  $J$  = 5.0, 13.1 Hz, 1H), 4.91~4.979 (m, 3H), 4.21~4.19 (m, 1H), 1.25 (d,  $J$  = 2.0 Hz, 6H), 1.07 (dd,  $J$  = 2.0, 2.0 Hz, 6H) ppm;  $^{13}\text{C}$  NMR (100 MHz,  $\text{CDCl}_3$ )  $\delta$  167.27, 166.54, 136.47, 129.07, 128.34, 127.9, 78.15, 70.15, 69.75, 55.35, 43.14, 21.80, 21.67, 21.48 ppm; IR(KBr) 3029, 2956, 1737, 1558  $\text{cm}^{-1}$ ; HRMS(ESI) for  $\text{C}_{17}\text{H}_{24}\text{N}_1\text{O}_6[\text{M}+\text{H}]^+$  Calcd: 338.15981 Found: 338.16336; HPLC [Chiralcel AD-H, hexane/2-propanol = 95/5, 1.0 mL/min,  $\lambda$  = 254 nm, retention times: (major) 14.8 min, (minor) 34.4 min].

**(*R*)-Dipropyl 2-(2-nitro-1-phenylethyl)malonate (2d)<sup>1,3</sup>**

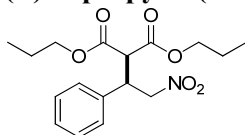

$^1\text{H}$  NMR (300 MHz,  $\text{CDCl}_3$ )  $\delta$  7.31~7.22 (m, 5H), 4.92~4.87 (t,  $J$  = 5.0, 9.5 Hz, 2H), 4.24 (m, 1H), 4.15~4.09 (m, 2H), 3.92~3.83 (dd,  $J$  = 6.6, 9.7 Hz, 3H), 1.68~1.61 (m, 2H), 1.49~1.42 (m, 2H), 0.93~0.88 (t,  $J$  = 7.4, 7.4 Hz, 3H), 0.82~0.77 (t,  $J$  = 7.4, 7.4 Hz, 3H) ppm;  $^{13}\text{C}$  NMR (100 MHz,  $\text{CDCl}_3$ )  $\delta$  167.79, 167.17, 136.46, 129.14, 128.52, 128.17, 77.85, 67.86, 67.65, 55.17, 43.16, 21.97, 21.81, 10.48 ppm; IR(KBr) 3029, 2956, 1737, 1558  $\text{cm}^{-1}$ ; HRMS(ESI) for  $\text{C}_{17}\text{H}_{24}\text{N}_1\text{O}_6[\text{M}+\text{H}]^+$  Calcd: 338.15981 Found: 338.16336; HPLC [Chiralcel AD-H, hexane/2-propanol = 95/5, 1.0 mL/min,  $\lambda$  = 254 nm, retention times: (major) 18.4 min, (minor) 38.9 min].

**(*R*)-Benzyl 2-carbobenzyloxy-4-nitro-3-phenylbutyrate (2e)<sup>1,3</sup>**

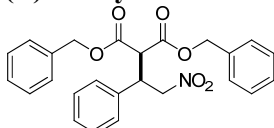

$^1\text{H}$  NMR (400 MHz,  $\text{CDCl}_3$ )  $\delta$  7.33~7.25 (m, 10H), 7.17~7.07 (m, 5H), 5.16 (d, 1H,  $J$  = 12.2 Hz), 5.18 (d, 1H,  $J$  = 12.2 Hz), 4.93 (s, 1H), 4.84~4.82 (m, 2H), 4.28~4.22 (q, 1H), 3.94 (d, 1H, 9.3 Hz);  $^{13}\text{C}$  NMR (100 MHz,  $\text{CDCl}_3$ )  $\delta$  167.39, 166.78, 136.14, 134.85, 129.25, 128.90, 128.15, 77.63, 68.04, 67.86, 55.14, 43.16 ppm; IR(KBr) 3068, 3036, 2963, 1736, 1558, 1498, 1456, 1378, 1326, 1286, 1217, 1156,

1003, 975, 908, 562  $\text{cm}^{-1}$ ; HRMS(EI) for  $\text{C}_{25}\text{H}_{23}\text{N}_1\text{O}_6[\text{M}+\text{H}]^+$  Calcd: 433.1525 Found: 433.1525; HPLC [Chiralcel AD-H, hexane/2-propanol = 70/30, 1.0 mL/min,  $\lambda$  = 254 nm, retention times: (major) 26.0 min, (minor) 24.1 min].

**(R)-dibutyl 2-(2-nitro-1-phenylethyl)malonate (2f)<sup>1,3</sup>**

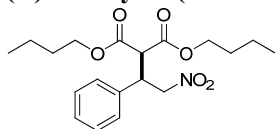

$^1\text{H}$  NMR (400 MHz,  $\text{CDCl}_3$ )  $\delta$  7.31~7.22 (m, 5H), 4.92~4.87 (t,  $J$  = 5.0, 9.5 Hz, 2H), 4.24 (m, 1H), 4.15~4.09 (m, 2H), 3.92~3.83 (dd,  $s$ ,  $J$  = 6.6, 9.7 Hz, 3H), 1.68~1.61 (m, 2H), 1.49~1.42 (m, 2H), 0.93~0.88 (t,  $J$  = 7.4, 7.4 Hz, 3H), 0.82~0.77 (t,  $J$  = 7.4, 7.4 Hz, 3H) ppm;  $^{13}\text{C}$  NMR (100 MHz,  $\text{CDCl}_3$ )  $\delta$  167.79, 167.17, 136.46, 129.14, 128.52, 128.17, 77.85, 67.86, 67.65, 55.17, 43.16, 21.97, 21.81, 10.48 ppm; HRMS(EI) for  $\text{C}_{17}\text{H}_{24}\text{N}_1\text{O}_6[\text{M}+\text{H}]^+$  Calcd: 338.15981 Found: 338.16336; HPLC [Chiralcel AD-H, hexane/2-propanol = 95/5, 1.0 mL/min,  $\lambda$  = 254 nm, retention times: (major) 18.4 min, (minor) 38.9 min].

**(R)-Diethyl 2-[1-(4-bromophenyl)-2-nitroethyl]malonate (2g)<sup>3</sup>**

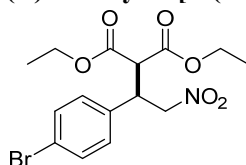

$^1\text{H}$  NMR (300 MHz,  $\text{CDCl}_3$ )  $\delta$  7.44~7.42 (d,  $J$  = 8.5 Hz, 2H), 7.13~7.11 (d,  $J$  = 8.2 Hz, 2H), 4.88~4.81 (m, 2H), 4.22~4.16 (m, 3H), 4.04~3.97 (q,  $J$  = 7.1, 6.9 Hz, 2H), 3.78~3.75 (d,  $J$  = 9.4 Hz, 1H), 1.26~1.21 (t,  $J$  = 7.2, 7.1 Hz, 3H), 1.08~1.03 (t,  $J$  = 7.1, 7.1 Hz, 3H) ppm;  $^{13}\text{C}$  NMR (100 MHz,  $\text{CDCl}_3$ )  $\delta$  167.42, 166.83, 135.52, 132.29, 130.00, 122.62, 77.55, 62.50, 62.26, 54.86, 42.60, 14.17, 13.99 ppm; IR (KBr) 2983, 2950, 1732, 1556, 1490, 1445  $\text{cm}^{-1}$  HRMS(ESI) for  $\text{C}_{15}\text{H}_{19}\text{N}_1\text{O}_6\text{Br}[\text{M}+\text{H}]^+$  Calcd: 388.03903 Found: 388.04495; HPLC [Chiralcel AD-H, hexane/ethanol = 95/5, 1.0 mL/min,  $\lambda$  = 254 nm, retention times: (major) 35.9 min, (minor) 44.4 min].

**(R)-diethyl 2-(1-(4-chlorophenyl)-2-nitroethyl)malonate (2h)<sup>3</sup>**

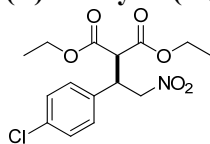

$^1\text{H}$  NMR (300 MHz,  $\text{CDCl}_3$ )  $\delta$  7.29~7.17 (dd,  $J$  = 20.6, 8.2 Hz, 4H), 4.88~4.81 (m, 2H), 4.23~4.16 (m, 3H), 4.04~3.97 (q,  $J$  = 7.1, 7.1 Hz, 2H), 3.78~3.75 (d,  $J$  = 9.3 Hz, 1H), 1.26~1.21 (t,  $J$  = 7.1, 7.2 Hz, 3H), 1.08~1.03 (t,  $J$  = 7.2, 6.8 Hz, 3H) ppm;  $^{13}\text{C}$  NMR (100 MHz,  $\text{CDCl}_3$ )  $\delta$  167.44, 166.83, 134.98, 134.46, 129.69, 129.32, 77.63, 62.49, 62.23, 54.92, 42.55, 14.15, 13.97 ppm; IR (KBr) 2984, 1733, 1557, 1478, 1445, 1371  $\text{cm}^{-1}$  HRMS(ESI) for  $\text{C}_{15}\text{H}_{19}\text{N}_1\text{O}_6\text{Cl}[\text{M}+\text{H}]^+$  Calcd: 344.08954 Found: 344.09119; HPLC [Chiralcel AD-H, hexane/ethanol = 90/10, 1.0 mL/min,  $\lambda$  = 254 nm, retention times: (major) 17.9 min, (minor) 24.1 min].

**(R)-Diethyl 2-[2-nitro-1-(p-tolyl)ethyl]malonate (2i)<sup>3</sup>**

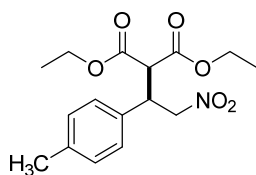

$^1\text{H}$  NMR (300 MHz,  $\text{CDCl}_3$ )  $\delta$  7.09 (d,  $J = 15.2$  Hz, 4H), 4.89~4.78 (m, 2H), 4.22~4.14 (m, 3H), 4.01~3.96 (q,  $J = 7.0, 7.1$  Hz, 2H), 3.79 (d,  $J = 9.3$  Hz, 1H), 2.27 (s, 3H), 1.25~1.22 (t,  $J = 7.1, 7.0$  Hz, 3H), 1.06~1.02 (t,  $J = 7.1, 8.6$  Hz, 3H) ppm;  $^{13}\text{C}$  NMR (100 MHz,  $\text{CDCl}_3$ )  $\delta$  167.74, 167.08, 138.27, 138.23, 133.30, 129.80, 128.05, 78.00, 62.32, 62.06, 55.24, 42.84, 21.28, 14.18, 13.97 ppm; IR(KBr) 3030, 2987, 1732, 1612, 1557  $\text{cm}^{-1}$ ; HRMS(ESI) for  $\text{C}_{16}\text{H}_{22}\text{N}_1\text{O}_6[\text{M}+\text{H}]^+$  Calcd: 324.14416 Found: 324.14648; HPLC [Chiralcel AD-H, hexane/ethanol = 98/2, 1.0 mL/min,  $\lambda = 254$  nm, retention times: (major) 36.0 min, (minor) 42.8 min].

**(R)-Diethyl 2-[1-(4-hydroxyphenyl)-2-nitroethyl]malonate (2j)<sup>3</sup>**

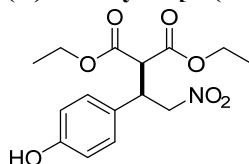

$^1\text{H}$  NMR (300 MHz,  $\text{CDCl}_3$ )  $\delta$  7.09~7.06 (d,  $J = 8.3$  Hz, 2H), 6.72~6.70 (d,  $J = 8.2$  Hz, 2H), 5.63 (br, 1H), 4.91~4.74 (m, 2H), 4.25~4.12 (m, 3H), 4.05~3.98 (q,  $J = 7.1, 6.8$  Hz, 2H), 3.79 (d,  $J = 9.7$  Hz, 1H), 1.29~1.24 (t,  $J = 7.1, 6.6$  Hz, 3H), 1.09~1.05 (t,  $J = 7.1, 7.2$  Hz, 3H) ppm;  $^{13}\text{C}$  NMR (100 MHz,  $\text{CDCl}_3$ )  $\delta$  167.74, 167.28, 155.88, 129.54, 128.06, 78.17, 62.44, 62.23, 55.29, 42.53, 29.92, 14.20, 14.00 ppm; HRMS(ESI) for  $\text{C}_{15}\text{H}_{20}\text{N}_1\text{O}_7[\text{M}+\text{H}]^+$  Calcd: 326.12343 Found: 326.12903; HPLC [Chiralcel AD-H, hexane/ethanol = 90/10, 1.0 mL/min,  $\lambda = 254$  nm, retention times: (major) 20.4 min, (minor) 50.6 min].

**(R)-Diethyl 2-[1-(4-methoxyphenyl)-2-nitroethyl]malonate (2k)<sup>3</sup>**

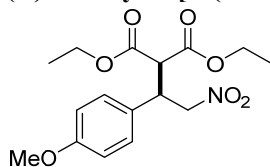

$^1\text{H}$  NMR (300 MHz,  $\text{CDCl}_3$ )  $\delta$  7.16~7.13 (d,  $J = 8.5$  Hz, 2H), 6.84~6.81 (d,  $J = 8.8$  Hz, 2H), 4.87~4.80 (m, 2H), 4.24~4.16 (m, 3H), 4.04~3.97 (q,  $J = 7.1, 7.1$  Hz, 2H), 3.79~3.78 (d,  $J = 2.7$  Hz, 1H), 3.76 (s, 3H), 1.28~1.23 (t,  $J = 7.1, 7.2$  Hz, 3H), 1.08~1.03 (t,  $J = 7.1, 7.1$  Hz, 3H) ppm;  $^{13}\text{C}$  NMR (100 MHz,  $\text{CDCl}_3$ )  $\delta$  167.73, 167.08, 159.61, 129.36, 128.17, 114.48, 78.12, 62.34, 62.06, 55.42, 55.30, 42.53, 14.19, 14.01 ppm; IR(KBr) 2988, 2936, 2904, 1730, 1612, 1552  $\text{cm}^{-1}$ ; HRMS(ESI) for  $\text{C}_{16}\text{H}_{22}\text{N}_1\text{O}_7[\text{M}+\text{H}]^+$  Calcd: 340.13908 Found: 340.13901; HPLC [Chiralcel AD-H, hexane/ethanol = 90/10, 1.0 mL/min,  $\lambda = 254$  nm, retention times: (major) 23.8 min, (minor) 39.5 min].

**(R)-Diethyl 2-[1-(2-methoxyphenyl)-2-nitroethyl]malonate (2l)<sup>3</sup>**

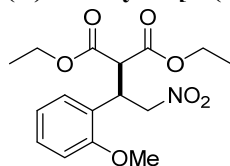

$^1\text{H}$  NMR (300 MHz,  $\text{CDCl}_3$ )  $\delta$  7.26~7.21(m, 1H), 7.15~7.12 (m, 1H), 6.87~6.83 (m, 2H), 5.06~4.98 (dd,  $J = 3.6, 1.1$  Hz, 1H), 4.89~4.83 (dd,  $J = 3.6, 1.1$  Hz, 1H), 4.37~4.34 (m, 1H), 4.24~4.12 (m, 3H), 3.97~3.90 (q,  $J = 7.2, 7.2$  Hz, 2H), 3.85 (s, 3H), 1.28~1.23 (t,  $J = 7.1, 6.9$  Hz, 3H), 1.01~0.96 (t,  $J = 7.2, 7.1$  Hz, 3H) ppm;  $^{13}\text{C}$  NMR (100 MHz,  $\text{CDCl}_3$ )  $\delta$  168.14, 167.41, 157.62, 131.09, 129.83, 123.87, 120.96, 111.27, 76.40, 62.18, 61.77, 55.62, 52.89, 40.74, 14.20, 13.94 ppm; IR (KBr) 2984, 2939, 2908, 1732, 1613, 1556  $\text{cm}^{-1}$  HRMS(ESI) for  $\text{C}_{16}\text{H}_{22}\text{N}_1\text{O}_6[\text{M}]$  Calcd: 339.13125 Found: 339.12933; HPLC [Chiralcel AD-H, hexane/2-propanol = 95/5, 1.0 mL/min,  $\lambda = 254$  nm, retention times: (major) 14.9 min, (minor) 20.6 min].

#### Ethyl 2-acetyl-4-nitro-3-phenylbutanoate (2m)<sup>4</sup>

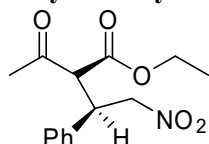

$^1\text{H}$  NMR (300 MHz,  $\text{CDCl}_3$ )  $\delta$  7.30 (m, 3H), 7.21 (d,  $J = 6.6$  Hz, 2H), 4.80 (m, 2H), 4.22 (m, 1.8H), 4.12 (d,  $J = 10.1$  Hz, 0.6H), 4.03 (d,  $J = 9.0$  Hz, 0.4H), 3.96 (q,  $J = 15$  Hz, 1.2H), 2.30 (s, 1.6H), 2.06 (s, 1.4H), 1.28 (t,  $J = 15.0$  Hz, 1.2H), 1.00 (t,  $J = 12.0$  Hz, 1.8H);  $^{13}\text{C}$  NMR (100 MHz,  $\text{CDCl}_3$ )  $\delta$  201.3, 200.5, 167.7, 167.0, 136.6, 136.5, 129.3, 129.1, 128.4, 128.1, 78.1, 78.0, 62.4, 62.1, 61.8, 42.7, 42.5, 30.5, 30.3, 14.2, 13.8; IR ( $\text{CHCl}_3$ )  $\nu$  3031, 2987, 1741, 1718, 1556, 1375  $\text{cm}^{-1}$ ; HRMS ( $\text{FAB}^+$ ) Calcd. for  $[\text{C}_{14}\text{H}_{18}\text{NO}_5]^+$ : 280.1185; Found: 280.1187; HPLC [Chiralcel AD-H, hexane/2-propanol = 80/20, 0.8 mL/min,  $\lambda = 210$  nm] retention times: (major diastereomer) 10.0, 11.4 min, (minor diastereomer) 8.0, 19.9 min.

#### Ethyl 1-(2-nitro-1-phenylethyl)-2-oxocyclopentanecarboxylate (2n)<sup>5,6</sup>

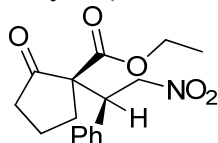

$^1\text{H}$  NMR (300 MHz,  $\text{CDCl}_3$ )  $\delta$  7.20~7.27 (m, 5 H), 5.15~5.21 (dd,  $J = 4.2$  Hz, 3.9 Hz, 1 H), 4.98~5.06 (dd,  $J = 11.2$  Hz, 11.0 Hz, 1 H), 4.18~4.25 (m, 2 H), 4.06~4.11 (dd,  $J = 3.8$  Hz, 3.8 Hz, 1 H), 2.30~2.45 (m, 2 H), 1.79~2.07 (m, 4 H), 1.25~1.30 (t,  $J = 7.2$  Hz, 3 H);  $^{13}\text{C}$  NMR (100 MHz,  $\text{CDCl}_3$ )  $\delta$  207.3, 169.8, 135.5, 129.6, 128.6, 128.4, 77.7, 62.17, 47.9, 41.6, 37.2, 28.1, 22.5, 14.2; IR ( $\text{CHCl}_3$ )  $\nu$  3031, 2957, 1751, 1727, 1556,  $\text{cm}^{-1}$  HRMS ( $\text{FAB}^+$ ) Calcd. for  $[\text{C}_{16}\text{H}_{20}\text{NO}_5]^+$ : 306.1341, found: 306.1341; Major diastereomer: *ee* was determined by HPLC [Chiralpak OD-H column, hexanes/2-propanol = 93/7, flow rate = 1 mL/min,  $\lambda = 220$  nm] retention times: (major enantiomer) = 16.5 min, (minor enantiomer) = 22.6 min.

#### Methyl 1-(2-nitro-1-phenylethyl)-2-oxocyclopentanecarboxylate (2o)<sup>5,6</sup>

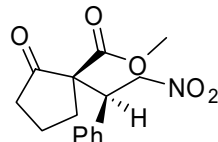

$^1\text{H}$  NMR (300 MHz,  $\text{CDCl}_3$ )  $\delta$  7.34~7.22 (m, 5H), 5.17 (dd,  $J = 3.8, 13.5$  Hz, 1H), 5.01 (dd,  $J = 10.7, 13.5$  Hz, 1H), 4.08 (dd,  $J = 3.9, 10.8$  Hz, 1H), 3.76 (s, 3H), 2.42~2.30 (m, 2H), 2.09~1.79 (m, 4H);  $^{13}\text{C}$  NMR for major diastereomer (100 MHz,  $\text{CDCl}_3$ )  $\delta$  212.5, 170.0, 135.4, 129.5, 129.0, 128.5, 76.6, 62.6, 53.2, 46.3, 38.1, 31.2, 19.5; IR ( $\text{CHCl}_3$ )  $\nu$  3031, 2957, 1751, 1727, 1556,  $\text{cm}^{-1}$ ; HRMS ( $\text{FAB}^+$ ) Calcd. for  $[\text{C}_{15}\text{H}_{19}\text{NO}_5]^+$ : 292.1185, found: 292.1180; HPLC [Chiralcel OD-H, hexanes/2-propanol = 93/7, 0.5 mL/min,  $\lambda = 210$  nm] retention times: (major enantiomer) 28.8 min, (minor enantiomer) 23.3 min, (minor diastereomers) 15.7, 18.5 min.

#### Methyl 1-(2-nitro-1-phenylethyl)-2-oxocyclohexanecarboxylate (2p)<sup>5,6</sup>

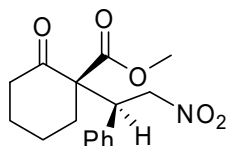

$^1\text{H}$  NMR (300 MHz,  $\text{CDCl}_3$ )  $\delta$  7.30–7.27 (m, 3H), 7.17–7.12 (m, 2H), 5.06 (dd,  $J$  = 3.1, 13.5 Hz, 0.96H), 4.78 (dd,  $J$  = 11.2, 13.2 Hz, 1H), 4.01 (dd,  $J$  = 3, 11.3 Hz, 0.96H), 3.75 (s, 2.88H), 3.68 (s, 0.12H), 2.57–2.39 (m, 2H), 2.14–1.98 (m, 2H), 1.77–1.45 (m, 4H);  $^{13}\text{C}$  NMR (100 MHz,  $\text{CDCl}_3$ )  $\delta$  207.1, 170.3, 135.4, 129.5, 128.7, 128.4, 77.6, 63.2, 52.7, 47.8, 41.6, 37.1, 28.1, 22.5; IR ( $\text{CHCl}_3$ )  $\nu$  3027, 2951, 1713, 1556  $\text{cm}^{-1}$ ; HRMS (FAB $^+$ ) Calcd. for  $[\text{C}_{16}\text{H}_{20}\text{NO}_5]^+$ : 306.1341, found: 306.1340; HPLC [Chiralcel OJ-H, hexanes/2-propanol = 80/20, 0.5 mL/min,  $\lambda$  = 210 nm] retention times: (major enantiomer) 56.2 min, (minor enantiomer) 51.9 min, (minor diastereomers) 70.0, 102.4 min.

**(S)-4-Nitro-1,3-diphenyl-butan-1-one (3a)<sup>7</sup>**

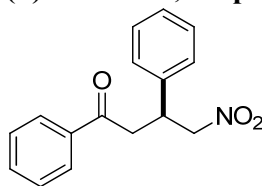

$^1\text{H}$  NMR (500 MHz,  $\text{CDCl}_3$ )  $\delta$  7.91~7.92 (m, 2H), 7.59~7.26 (m, 8H), 4.85~4.81 (dd,  $J$  = 12.5, 6.7 Hz, 1H), 4.71~4.67 (dd,  $J$  = 12.5, 7.8 Hz, 1H), 4.26~4.20 (m, 1H), 3.51~3.46 (dd,  $J$  = 17.7, 6.4 Hz, 1H), 3.45~3.40 (dd,  $J$  = 17.7, 7.5 Hz, 1H) ppm;  $^{13}\text{C}$  NMR (125 MHz,  $\text{CDCl}_3$ )  $\delta$  196.87, 139.15, 136.39, 133.60, 129.09, 128.77, 128.04, 127.90, 127.48, 79.58, 41.54, 39.30 ppm; IR (KBr) 3058, 3029, 2920, 1687, 1544, 1440, 1367, 1268, 1224, 1084, 988, 764, 703, 623, 559  $\text{cm}^{-1}$ ; LRMS (ESI $^+$ ) for  $\text{C}_{16}\text{H}_{15}\text{NO}_3$   $[\text{M}+\text{Na}]^+$  Calcd: 292.1, Found: 292.1; HPLC [Chiralcel AD-H, hexane/2-propanol = 90/10, flow rate = 1.0 mL/min,  $\lambda$  = 254 nm, retention times: (major) 14.3 min, (minor) 19.9 min];

**(S)-4-nitro-1-phenyl-3-(p-tolyl)butan-1-one (3b)**

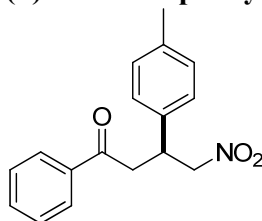

$^1\text{H}$  NMR (500 MHz,  $\text{CDCl}_3$ )  $\delta$  7.91 (d,  $J$  = 7.0 Hz, 2H), 7.57 (t,  $J$  = 7.5 Hz, 1H), 7.45 (t,  $J$  = 8.0 Hz, 2H), 7.18~7.13 (m, 4H), 4.83~4.79 (dd,  $J$  = 12.5, 6.5 Hz, 1H), 4.68~4.64 (dd,  $J$  = 12.5, 8.0 Hz, 1H), 4.22~4.16 (m, 1H), 3.48~3.44 (dd,  $J$  = 17.5, 6.5 Hz, 1H), 3.43~3.38 (dd,  $J$  = 18.0, 7.5 Hz, 1H), 2.31 (s, 3H) ppm;  $^{13}\text{C}$  NMR (125 MHz,  $\text{CDCl}_3$ )  $\delta$  196.96, 137.60, 136.42, 136.05, 133.56, 129.76, 128.75, 128.05, 127.31, 79.73, 41.59, 38.96, 21.07 ppm; IR (KBr) 3058, 2922, 2862, 1685, 1551, 1516, 1446, 1377, 1270, 1225, 998, 817, 755, 691, 551  $\text{cm}^{-1}$ ; LRMS (ESI $^+$ ) for  $\text{C}_{17}\text{H}_{17}\text{NO}_3$   $[\text{M}+\text{Na}]^+$  Calcd: 306.1, Found: 306.2; HPLC [Chiralcel AD-H, hexane/2-propanol = 90/10, flow rate = 1.0 mL/min,  $\lambda$  = 254 nm, retention times: (major) 11.9 min, (minor) 16. min];

**(S)-3-(4-Bromophenyl)-4-nitro-1-phenylbutan-1-one (3c)**

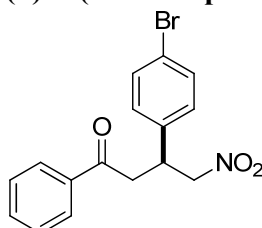



<sup>1</sup>H NMR (500 MHz, CDCl<sub>3</sub>) δ 7.90 (d, *J* = 7.0 Hz, 2H), 7.58 (t, *J* = 7.5 Hz, 1H), 7.48~7.45 (m, 4H), 7.18~7.16 (m, 2H), 4.83~4.79 (dd, *J* = 12.5, 6.5 Hz, 1H), 4.68~4.64 (dd, *J* = 12.5, 8.5 Hz, 1H), 4.23~4.17 (m, 1H), 3.48~3.43 (dd, *J* = 17.0, 6.5 Hz, 1H), 3.43~3.38 (dd, *J* = 17.0, 7.0 Hz, 1H) ppm; <sup>13</sup>C NMR (125 MHz, CDCl<sub>3</sub>) δ 196.47, 138.14, 136.21, 133.74, 132.22, 129.24, 128.82, 128.02, 121.85, 79.28, 41.30, 38.76 ppm; LRMS (ESI<sup>+</sup>) for C<sub>16</sub>H<sub>14</sub>BrNO<sub>3</sub> [M+Na]<sup>+</sup> Calcd: 370.0, Found: 370.1; HPLC [Chiralcel AD-H, hexane/2-propanol = 90/10, flow rate = 1.0 mL/min, λ = 254 nm, retention times: (major) 13.7 min];

**(S)-3-(4-Chlorophenyl)-4-nitro-1-phenylbutan-1-one (3d)<sup>8</sup>**

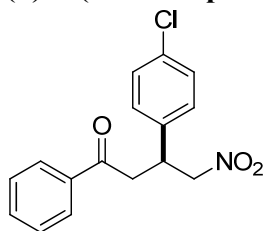

<sup>1</sup>H NMR (500 MHz, CDCl<sub>3</sub>) δ 7.92~7.90 (m, 2H), 7.60~7.57 (m, 1H), 7.48~7.45 (m, 2H), 7.32~7.29 (m, 2H), 7.24~7.22 (m, 2H), 4.83~4.80 (dd, *J* = 12.5, 6.5 Hz, 1H), 4.68~4.64 (dd, *J* = 12.5, 8.1 Hz, 1H), 4.25~4.19 (m, 1H), 3.48~3.43 (dd, *J* = 18.2, 6.4 Hz, 1H), 3.43~3.38 (dd, *J* = 18.2, 7.3 Hz, 1H) ppm; <sup>13</sup>C NMR (125 MHz, CDCl<sub>3</sub>) δ 196.50, 137.59, 136.23, 133.74, 129.27, 128.90, 128.82, 128.02, 79.36, 41.36, 38.70 ppm; LRMS (ESI<sup>+</sup>) for C<sub>16</sub>H<sub>14</sub>ClNO<sub>3</sub> [M+Na]<sup>+</sup> Calcd: 326.1, Found: 326.1; HPLC [Chiralcel AD-H, hexane/2-propanol = 95/5, flow rate = 1.0 mL/min, λ = 254 nm, retention times: (major) 23.4 min, (minor) 38.8 min];

**(S)-3-(4-Methoxyphenyl)-4-nitro-1-phenylbutan-1-one (3e)<sup>8</sup>**

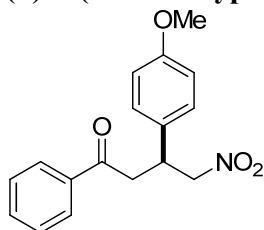

<sup>1</sup>H NMR (500 MHz, CDCl<sub>3</sub>) δ 7.93~7.91 (m, 2H), 7.59~7.44 (m, 3H), 7.20 (d, *J* = 8.7 Hz, 2H), 6.86 (d, *J* = 8.7, 2H), 4.82~4.78 (dd, *J* = 12.3, 6.7 Hz, 1H), 4.67~4.63 (dd, *J* = 12.3, 7.9 Hz, 1H), 4.21~4.15 (m, 1H), 3.78 (s, 3H), 3.47~3.43 (dd, *J* = 16.5, 6.5 Hz, 1H), 3.43~3.37 (dd, *J* = 16.5, 6.6 Hz, 1H) ppm; <sup>13</sup>C NMR (125 MHz, CDCl<sub>3</sub>) δ 196.99, 159.10, 136.42, 133.56, 130.99, 128.75, 128.52, 128.04, 114.45, 79.85, 55.27, 41.67, 38.65 ppm; LRMS (ESI<sup>+</sup>) for C<sub>17</sub>H<sub>17</sub>NO<sub>4</sub> [M+Na]<sup>+</sup> Calcd: 322.1, Found: 322.2; HPLC [Chiralcel AD-H, hexane/2-propanol = 80/20, flow rate = 1.0 mL/min, λ = 254 nm, retention times: (major) 11.9 min, (minor) 16.2 min];

**(S)-3-(2-Methoxyphenyl)-4-nitro-1-phenylbutan-1-one (3f)**

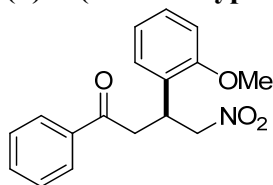

<sup>1</sup>H NMR (500 MHz, CDCl<sub>3</sub>) δ 7.94~7.92 (m, 2H), 7.58~7.55 (m, 1H), 7.47~7.44 (m, 2H), 7.26~7.20 (m, 2H), 6.92~6.88 (m, 2H), 4.89~4.82 (m, 2H), 4.45~4.39 (m, 1H), 3.86 (s, 3H), 3.54 (d, *J* = 7.5 Hz, 2H) ppm; <sup>13</sup>C NMR (125 MHz, CDCl<sub>3</sub>) δ 197.64, 157.20, 136.63, 133.38, 129.52, 128.99, 128.68, 128.05, 126.70, 120.96, 110.05, 77.90, 55.38, 39.80, 35.95 ppm; IR (KBr) 3063, 2923, 2852, 1684, 1598, 1550, 1494, 1445, 1377, 1246, 1120, 1025, 754, 690 cm<sup>-1</sup>; LRMS (ESI<sup>+</sup>) for C<sub>17</sub>H<sub>17</sub>NO<sub>4</sub> [M+Na]<sup>+</sup> Calcd: 322.1, Found: 322.2; HPLC [Chiralcel AD-H, hexane/2-propanol = 85/15, flow rate = 1.0 mL/min, λ = 254 nm, retention times: (major) 9.9 min, (minor) 14.1 min];

**(S)-3-(Furan-2-yl)-4-nitro-1-phenylbutan-1-one (3g)**

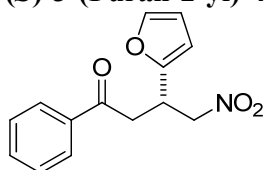

$^1\text{H}$  NMR (500 MHz,  $\text{CDCl}_3$ )  $\delta$  7.96~7.94 (m, 2H), 7.61~7.58 (m, 1H), 7.49~7.46 (m, 2H), 7.34 (m, 1H), 6.30~6.29 (m, 1H), 6.19 (d,  $J$  = 3.3 Hz, 1H), 4.83~4.79 (dd,  $J$  = 11.6, 5.4 Hz, 1H), 4.77~4.73 (dd,  $J$  = 11.6, 6.0 Hz, 1H), 4.36~4.31 (m, 1H), 3.55~3.50 (dd,  $J$  = 17.7, 6.1 Hz, 1H), 3.46~3.41 (dd,  $J$  = 17.7, 7.3 Hz, 1H) ppm;  $^{13}\text{C}$  NMR (125 MHz,  $\text{CDCl}_3$ )  $\delta$  196.55, 151.95, 142.32, 136.26, 133.69, 128.80, 128.07, 110.53, 107.20, 77.27, 38.99, 33.19 ppm; IR (KBr) 3121, 3062, 2918, 1685, 1596, 1553, 1505, 1448, 1377, 1213, 1183, 1012, 917, 749, 691, 599  $\text{cm}^{-1}$ ; LRMS( $\text{ESI}^+$ ) for  $\text{C}_{14}\text{H}_{13}\text{NO}_4$  [ $\text{M}+\text{Na}$ ] $^+$  Calcd: 282.1, Found: 282.1; HPLC [Chiralcel AD-H, hexane/2-propanol = 95/5, flow rate = 1.0 mL/min,  $\lambda$  = 254 nm, retention times: (major) 12.7 min];

**(S)-Phenyl 4-nitro-3-phenylbutanoate (4a)<sup>9</sup>**

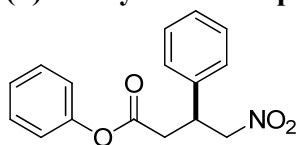

$[\alpha]_{\text{D}}^{20}$  +7.83 ( $c$  1.0,  $\text{CHCl}_3$ );  $^1\text{H}$  NMR (500 MHz,  $\text{CDCl}_3$ )  $\delta$  7.38~7.16 (m, 8H), 6.87~6.85 (m, 2H), 4.75~4.71 (dd,  $J$  = 11.6, 6.6 Hz, 1H), 4.68~4.64 (dd,  $J$  = 11.6, 6.4 Hz, 1H), 4.10~4.04 (m, 1H), 3.04~3.0 (dd,  $J$  = 13.7, 4.6 Hz, 1H), 2.99~2.94 (dd,  $J$  = 13.7, 5.6 Hz, 1H) ppm;  $^{13}\text{C}$  NMR (125 MHz,  $\text{CDCl}_3$ )  $\delta$  169.33, 150.33, 137.96, 129.50, 129.22, 128.29, 127.55, 126.12, 121.39, 79.38, 40.38, 37.87 ppm; LRMS ( $\text{ESI}^+$ ) for  $\text{C}_{16}\text{H}_{15}\text{NO}_4$  [ $\text{M}+\text{Na}$ ] $^+$  Calcd: 308.1, Found: 308.1;

**(S)-Phenyl 3-(4-chlorophenyl)-4-nitrobutanoate (4b)<sup>8</sup>**

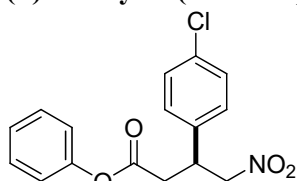

$[\alpha]_{\text{D}}^{20}$  +20.72 ( $c$  1.0,  $\text{CH}_2\text{Cl}_2$ );  $^1\text{H}$  NMR (500 MHz,  $\text{CDCl}_3$ )  $\delta$  7.35~7.22 (m, 7H), 6.92~6.90 (m, 2H), 4.79~4.75 (dd,  $J$  = 12.7, 7.3 Hz, 1H), 4.71~4.67 (dd,  $J$  = 12.7, 7.9 Hz, 1H), 4.11~4.06 (m, 1H), 3.08~3.03 (dd,  $J$  = 14.7, 5.3 Hz, 1H), 3.01~2.96 (dd,  $J$  = 14.7, 6.5 Hz, 1H) ppm;  $^{13}\text{C}$  NMR (125 MHz,  $\text{CDCl}_3$ )  $\delta$  169.01, 150.17, 136.37, 134.23, 129.53, 129.43, 128.88, 126.20, 121.26, 79.08, 39.70, 37.67 ppm; LRMS ( $\text{ESI}^+$ ) for  $\text{C}_{16}\text{H}_{14}\text{ClNO}_4$  [ $\text{M}+\text{Na}$ ] $^+$  Calcd: 342.1, Found: 342.1;

**(S)-4-Phenylpyrrolidin-2-one (4c)<sup>10,12</sup>**

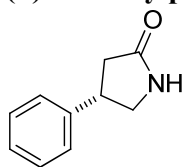

$[\alpha]_{\text{D}}^{20}$  +35.94 ( $c$  1.0, MeOH);

**(R)-4-Phenylpyrrolidin-2-one (4e)<sup>10,12</sup>**

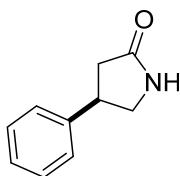

$[\alpha]_D^{20}$  -36.03 (*c* 1.0, MeOH);  $^1\text{H}$  NMR (500 MHz,  $\text{CDCl}_3$ )  $\delta$  7.37~7.33 (m, 2H), 7.29~7.27 (m, 2H), 7.26~7.25 (m, 1H), 5.92 (br s, 1H), 3.81~3.77 (m, 1H), 3.71 (q,  $J$  = 8.0 Hz, 1H), 3.45~3.41 (dd,  $J$  = 9.4, 2.0 Hz, 1H), 2.77~2.72 (dd,  $J$  = 16.8, 8.7 Hz, 1H), 2.54~2.49 (dd,  $J$  = 17.0, 8.5 Hz, 1H) ppm;  $^{13}\text{C}$  NMR (125 MHz,  $\text{CDCl}_3$ )  $\delta$  177.93, 142.14, 128.88, 127.13, 126.79, 49.60, 40.31, 38.02 ppm; LRMS ( $\text{ESI}^+$ ) for  $\text{C}_{10}\text{H}_{11}\text{NO}$   $[\text{M}+\text{H}]^+$  Calcd: 162.1, Found: 162.2; HPLC [Chiralcel AD-H, hexane/2-propanol = 90/10, flow rate = 1.0 mL/min,  $\lambda$  = 254 nm, retention times: (minor) 15.2 min, (major) 19.4 min];

**(S)-4-(4-Chlorophenyl)pyrrolidin-2-one (4d)<sup>11,12</sup>**

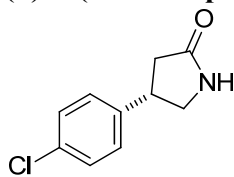

$[\alpha]_D^{22}$  -32.06 (*c* 1.0, EtOH);

**(R)-4-(4-Chlorophenyl)pyrrolidin-2-one (4f)<sup>11,12</sup>**

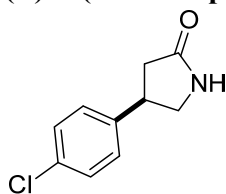

$[\alpha]_D^{22}$  +31.17 (*c* 1.0, EtOH);  $^1\text{H}$  NMR (500 MHz,  $\text{CDCl}_3$ )  $\delta$  7.32 (d,  $J$  = 8.5 Hz, 2H), 7.19 (d,  $J$  = 8.3 Hz, 2H), 5.72 (br s, 1H), 3.80~3.77 (m, 1H), 3.69 (q,  $J$  = 8.5 Hz, 1H), 3.40~3.36 (dd,  $J$  = 8.4, 2.5 Hz, 1H), 2.77~2.71 (dd,  $J$  = 17.8, 8.5 Hz, 1H), 2.48~2.43 (dd,  $J$  = 16.9, 8.5 Hz, 1H) ppm;  $^{13}\text{C}$  NMR (125 MHz,  $\text{CDCl}_3$ )  $\delta$  177.68, 140.59, 132.93, 129.03, 128.15, 49.49, 39.66, 37.90 ppm; HRMS ( $\text{ESI}^+$ ) for  $\text{C}_{10}\text{H}_9\text{ClNO}$   $[\text{M}+\text{H}]^+$  Calcd: 196.0445, Found: 196.1160.; HPLC [Chiralcel AD-H, hexane/2-propanol = 90/10, flow rate = 1.0 mL/min,  $\lambda$  = 254 nm, retention times: (minor) 14.7 min, (major) 18.7 min];

**(S)-4-Amino-3-phenylbutanoic acid (5a)<sup>9</sup>**

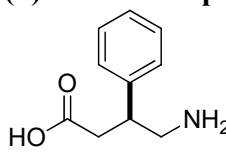

$[\alpha]_D^{25}$  +5.34 (*c* 0.5,  $\text{H}_2\text{O}$ );

**(R)-4-amino-3-phenylbutanoic acid (5c)**

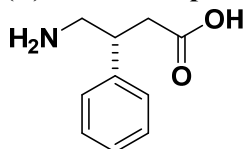

$[\alpha]_D^{25}$  = -5.51 (*c* 1.0,  $\text{H}_2\text{O}$ );

$^1\text{H}$  NMR (500 MHz,  $\text{D}_2\text{O}$ )  $\delta$  7.47~7.44 (m, 2H), 7.41~7.36 (m, 3H), 3.47~3.36 (m, 2H), 3.27 (t,  $J$  = 11.0 Hz, 1H), 2.89~2.85 (dd,  $J$  = 16.0, 5.9 Hz, 1H), 2.81~2.76 (dd,  $J$  = 16.0, 8.8 Hz, 1H) ppm;  $^{13}\text{C}$  NMR (125 MHz,  $\text{D}_2\text{O}$ )  $\delta$  175.62, 138.37, 129.37, 128.30, 127.87, 43.81, 40.0, 38.34 ppm; LRMS ( $\text{ESI}^+$ ) for  $\text{C}_{10}\text{H}_{13}\text{NO}_2$   $[\text{M}+\text{H}]^+$  Calcd: 180.1, Found: 180.2;  $R_f$  ( $\text{SiO}_2$ ,  $\text{CH}_2\text{Cl}_2/\text{MeOH}$  = 10/1) = 0.48

**(S)-4-Amino-3-(4-chlorophenyl)butanoic acid (5b)<sup>9</sup>**

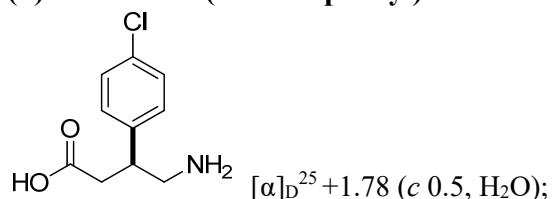

**(R)-4-Amino-[3-(4-chlorophenyl)]butanoic acid (5d)**

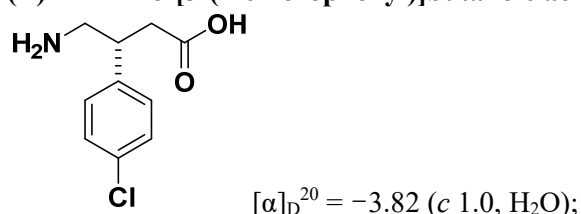

<sup>1</sup>H NMR (500 MHz, D<sub>2</sub>O)  $\delta$  7.40~7.37 (m, 2H), 7.29~7.26 (m, 2H), 3.39~3.30 (m, 2H), 3.22~3.16 (m, 1H), 2.81~2.76 (dd, *J* = 16.1, 5.9 Hz, 1H), 2.70~2.65 (dd, *J* = 16.1, 8.9 Hz, 1H) ppm; <sup>13</sup>C NMR (125 MHz, D<sub>2</sub>O)  $\delta$  175.46, 137.02, 133.38, 129.41, 129.25, 43.60, 39.47, 38.33 ppm; HRMS (FAB<sup>+</sup>) for C<sub>10</sub>H<sub>12</sub>ClNO<sub>2</sub> [M+H]<sup>+</sup> Calcd: 214.0635, Found: 214.0627;

**(S)-2-(2-oxo-4-phenylpyrrolidin-1-yl)acetamide(5e)**

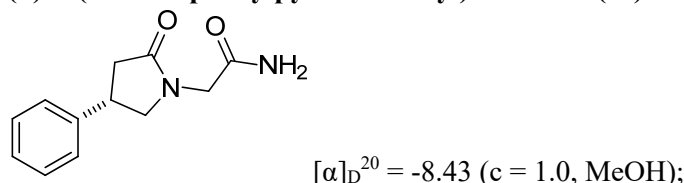

**(R)-2-(2-oxo-4-phenylpyrrolidin-1-yl)acetamide(5f)**

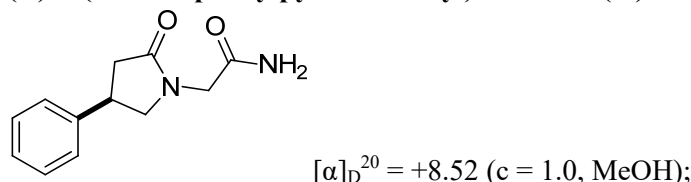

<sup>1</sup>H NMR spectrum (CDCl<sub>3</sub>),  $\delta$ , ppm: 2.59 d.d (1H, 3-H, 3J<sub>HH</sub> = 8.4, 2J<sub>HH</sub> = 17.0 Hz), 2.81 d.d (1H, 3-H, 3J<sub>HH</sub> = 8.4, 2J<sub>HH</sub> = 17.0 Hz), 3.53 m (1H, 5-H), 3.63 m (1H, 4-H), 3.85 m (1H, 5-H), 3.97 d.d (2H, NCH<sub>2</sub>CO, 3J<sub>HH</sub> = 16.3, 2J<sub>HH</sub> = 33.0 Hz); 6.24 br.s and 6.66 br.s (1H each, NH<sub>2</sub>), 7.22~7.31 m (5H, Ph). <sup>13</sup>C NMR spectrum (CDCl<sub>3</sub>),  $\delta$ C, ppm: 37.48, 38.54, 46.25, 55.55, 126.89, 127.27, 129.01, 141.97, 170.78, 175.03 pp; HRMS (ESI<sup>+</sup>) for C<sub>10</sub>H<sub>13</sub>NO<sub>2</sub> [M+Na]<sup>+</sup> Calcd: 241.0957, Found: 241.0947;

## References

1. D. Almaşı, D. Alonso, E. Gómez-Bengoa, C. Nájera, *J. Org. Chem.* 2009, **74**, 6163;
2. Manzano, R.; Andrés, J. M.; Muruzábal, M.; Pedrosa, R. *Adv. Synth. Cat.* 2010, **352**, 3364;
3. Okino, Y. Hoashi, T. Furukawa, X. Xu, Y. Takemoto *J. Am. Chem. Soc.* 2005, **127**, 119;
4. X. Jiang, Y. Zhang, X. Liu, G. Zhang, L. Lai, L. Wu, J. Zhang, R. Wang, *J. Org. Chem.* 2009, **74**, 5562;
5. K. Murai, S. Fukushima, S. Hayashi, Y. Takahara, H. Fujioka, *Org. Lett.* 2010, **12**, 964;
6. Z. H. Zhang, X. Dong, D. Chen, C. J. Wang *Chem. Eur. J.* 2008, **14**, 8780;
7. C. G. Kokotos, G. Kokotos, *Adv. Synth. Catal.* **2009**, **351**, 1355-1362
8. E. J. Corey, F.-Y. Zhang, *Org. Lett.* **2000**, **2**, 4257-4259.
9. M. Tsakos, C. G. Kokotos, and G. Kokotos, *Adv. Synth. Catal.* **2012**, **354**, 740-746
10. J. Wang, W. Li, Y. Liu, Y. Chu, L. Lin, X. Liu, X. Feng, *Org. Lett.* **2010**, **12**, 1280-1283

11. T. Okino, Y. Hoashi, T. Furukawa, X. Xu, Y. Takemoto, *J. Am. Chem. Soc.* **2005**, *127*, 119-125.
12. Q. Lang, G. Gu, Y. Cheng, Q. Yin, X. Zhang, *ACS Catal.* **2018**, *8*, 4824–4828

# Copy of HPLC Chromatograms

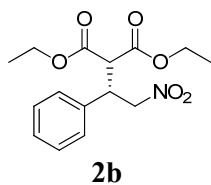

Racemic mixture

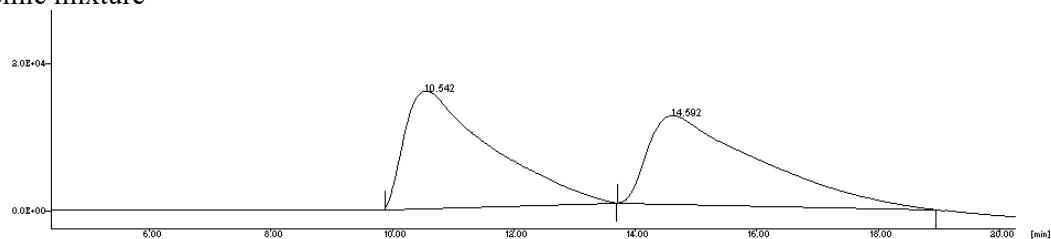

| #                                         | Name | RT     | Area[uV.Sec] | Quantity |
|-------------------------------------------|------|--------|--------------|----------|
| 1                                         |      | 10.542 | 1553861.500  | 0.000    |
| 2                                         |      | 14.592 | 1514396.259  | 0.000    |
| Total Area of Peak = 3068257.759 [uV.Sec] |      |        |              |          |

asymmetric

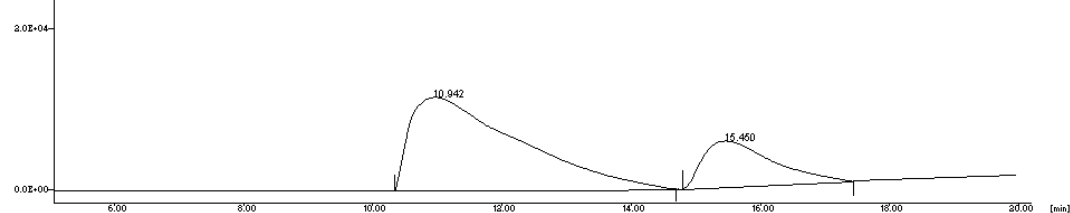

| #                                         | Name | RT     | Area[uV.Sec] | Quantity |
|-------------------------------------------|------|--------|--------------|----------|
| 1                                         |      | 10.942 | 1398174.488  | 0.000    |
| 2                                         |      | 15.450 | 429596.250   | 0.000    |
| Total Area of Peak = 1827770.738 [uV.Sec] |      |        |              |          |

SI Table 1-3

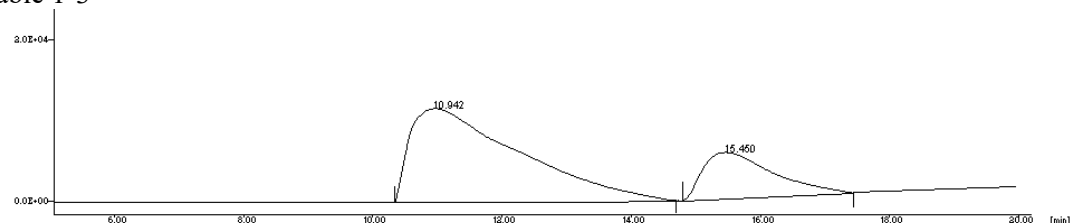

| #                                         | Name | RT     | Area[uV.Sec] | Quantity |
|-------------------------------------------|------|--------|--------------|----------|
| 1                                         |      | 10.942 | 1398174.488  | 0.000    |
| 2                                         |      | 15.450 | 429596.250   | 0.000    |
| Total Area of Peak = 1827770.738 [uV.Sec] |      |        |              |          |

SI Table 1-4

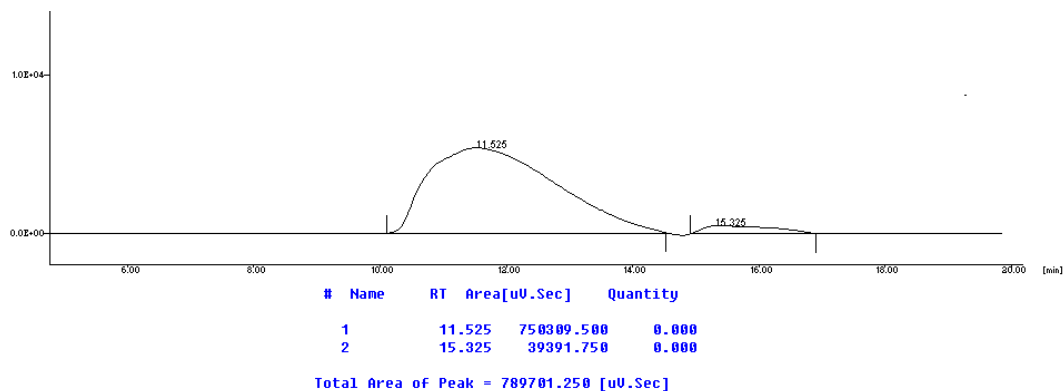

SI Table 1-5

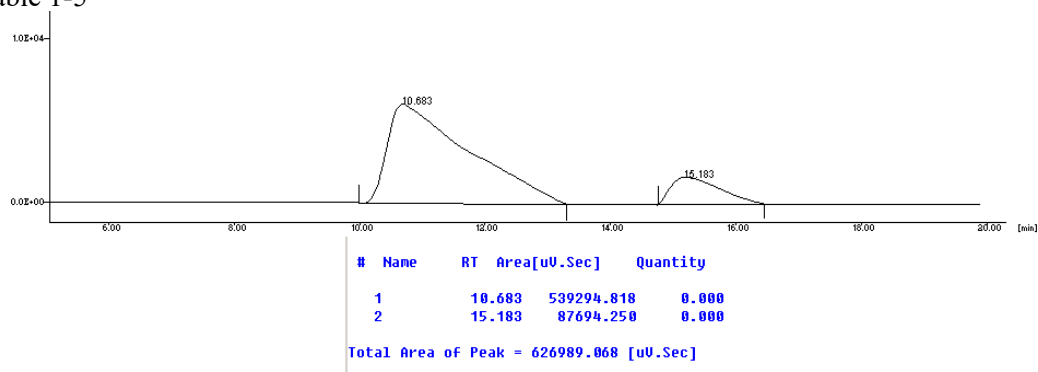

SI Table 1-6

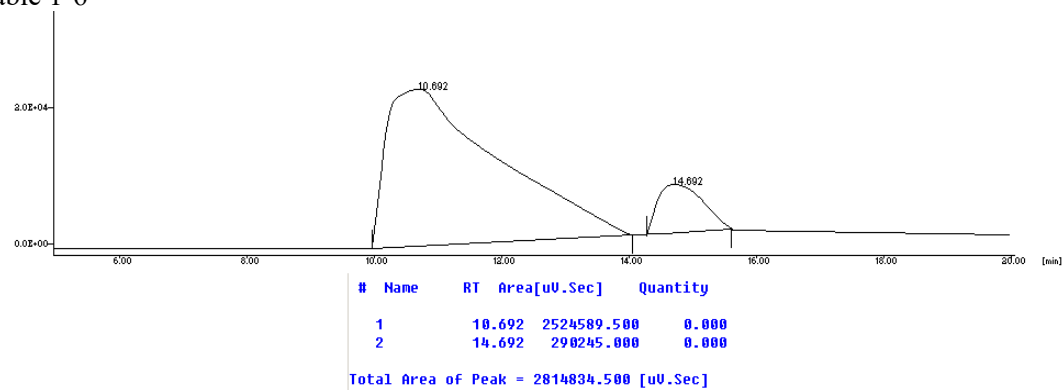

SI Table 1-7

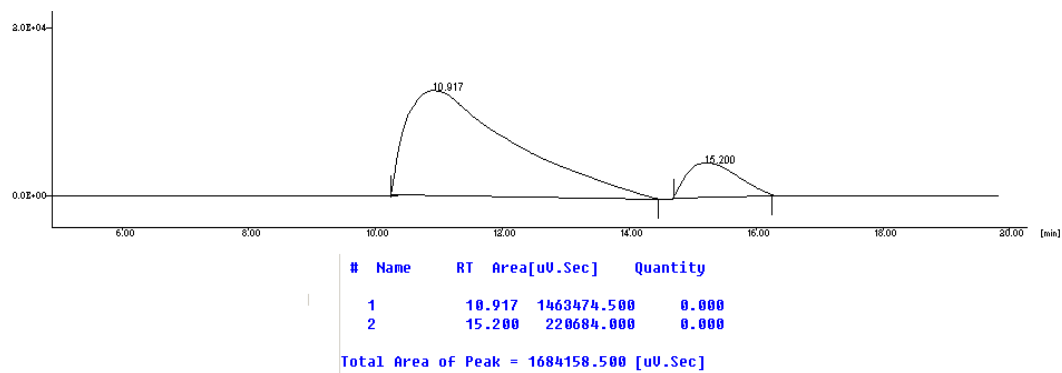

SI Table 1-8

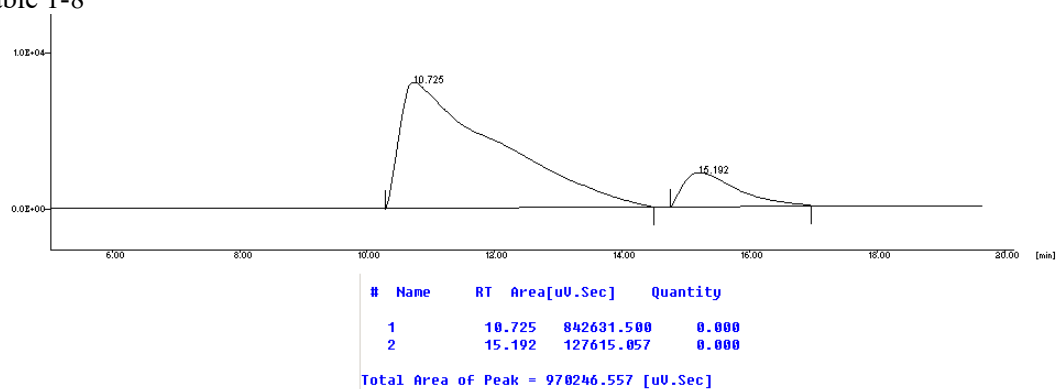

SI Table 1-9

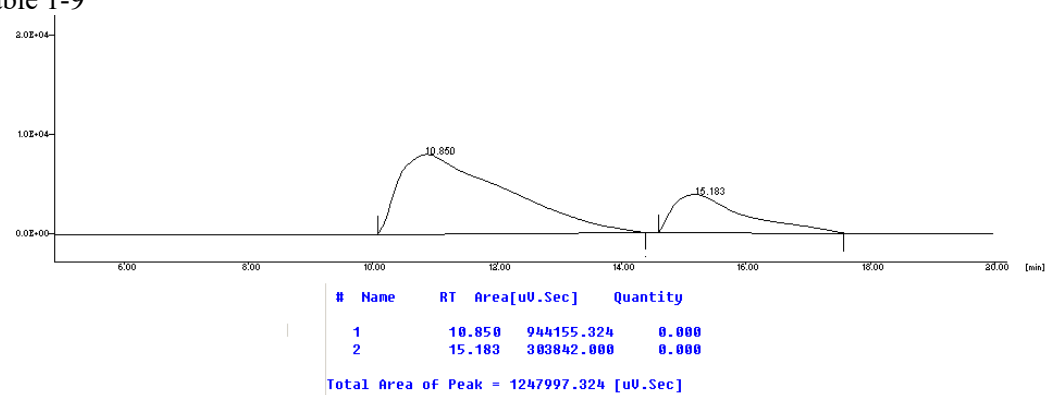

SI Table 2-1



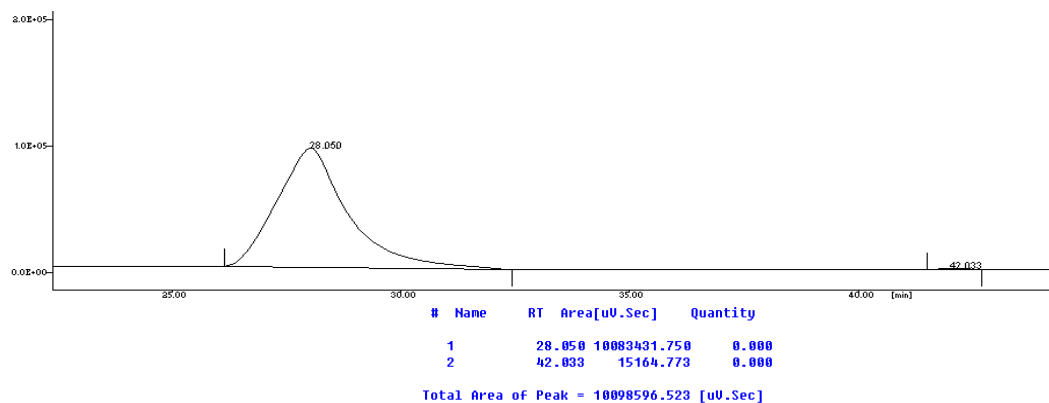

SI Table 2-3

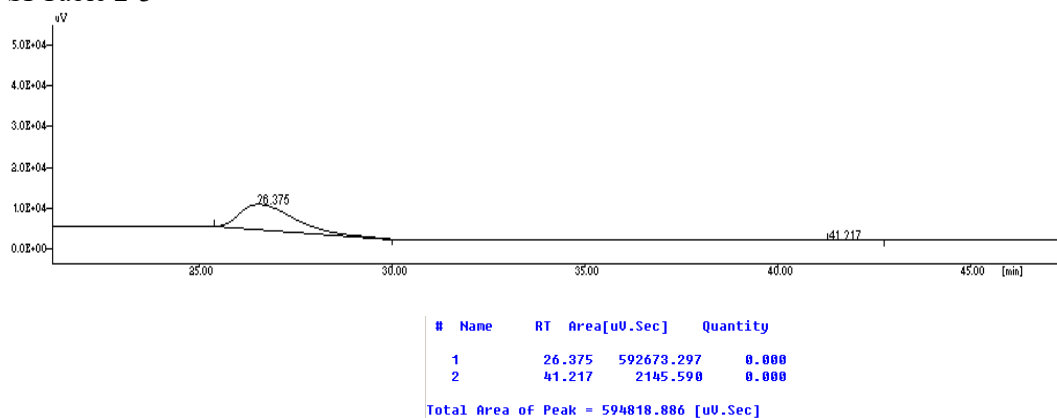

SI Table 2-4

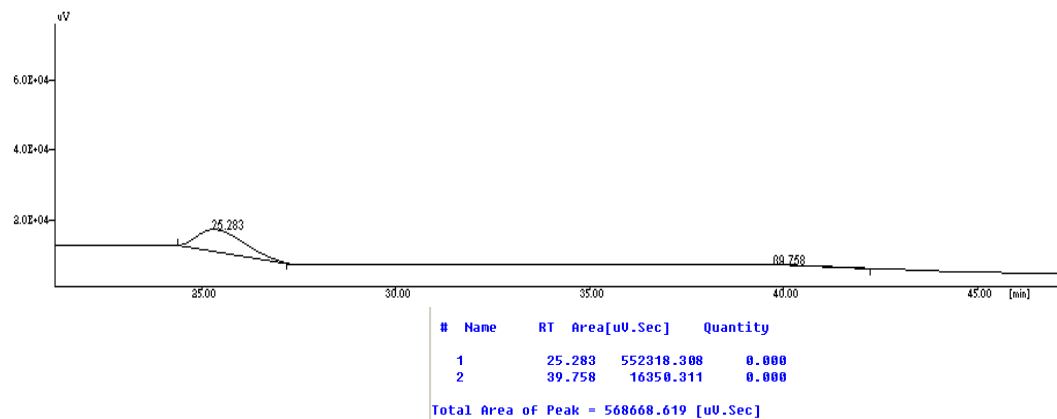

SI Table 2-5

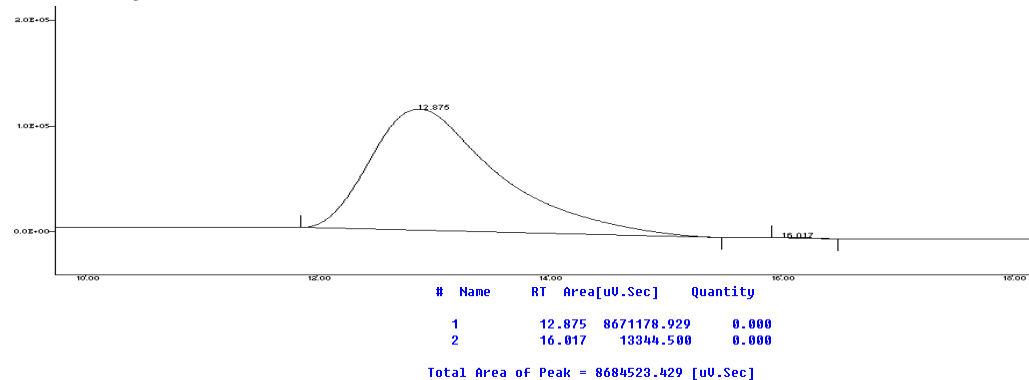

SI Table 2-6

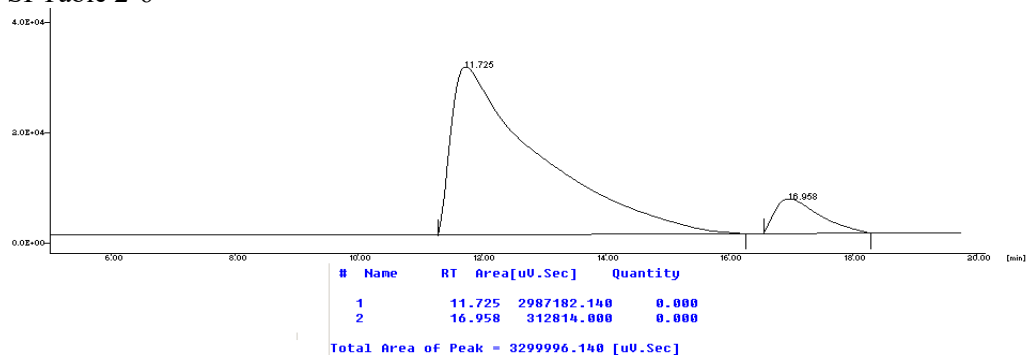

SI Table 2-7

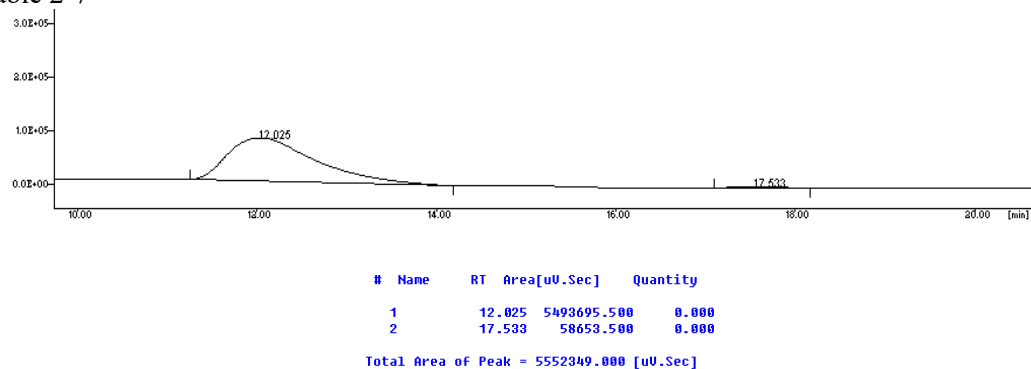

SI Table 2-8

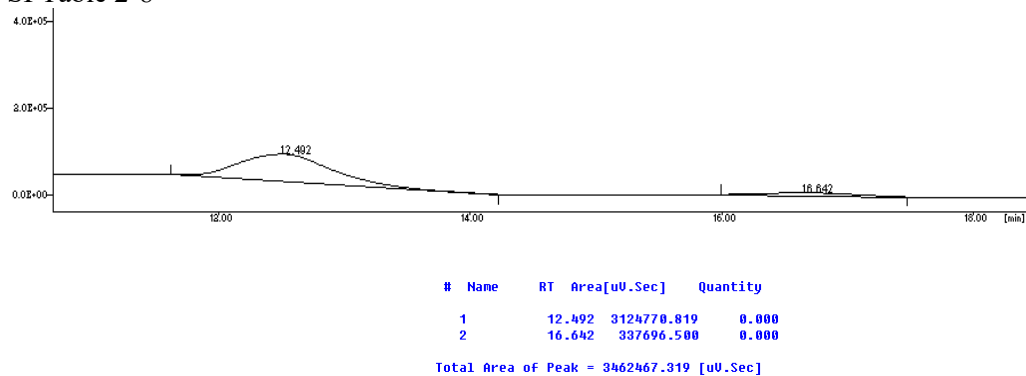

SI Table 2-9

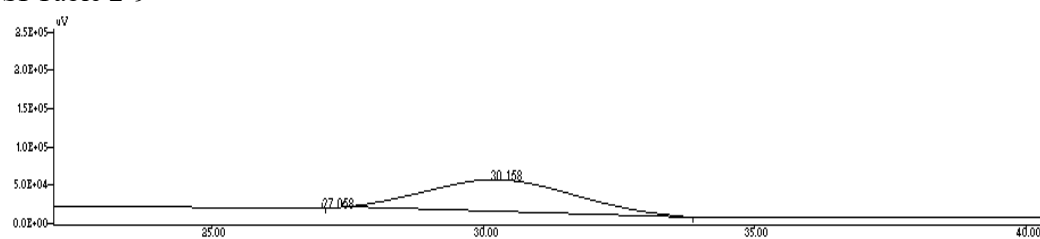

| # | Name | RT     | Area[uV.Sec] | Quantity |
|---|------|--------|--------------|----------|
| 1 |      | 27.058 | 41.000       | 0.000    |
| 2 |      | 30.158 | 7905472.750  | 0.000    |

Total Area of Peak = 7905513.750 [uV.Sec]

SI Table 2-10

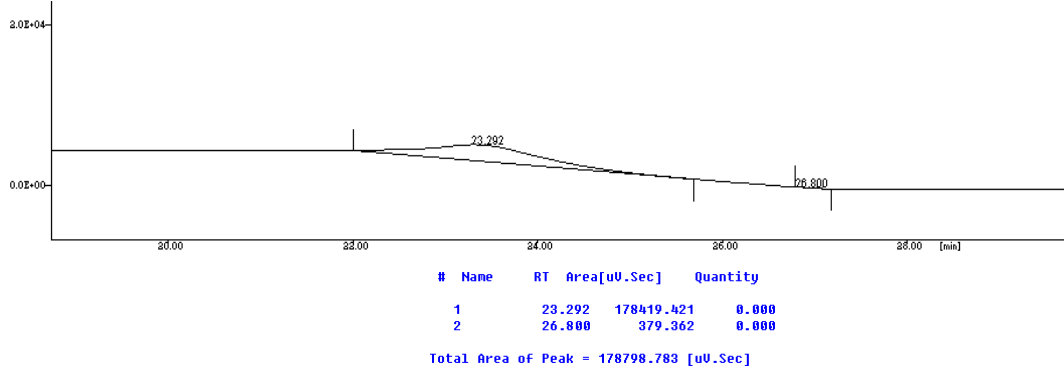

SI Table 3-1

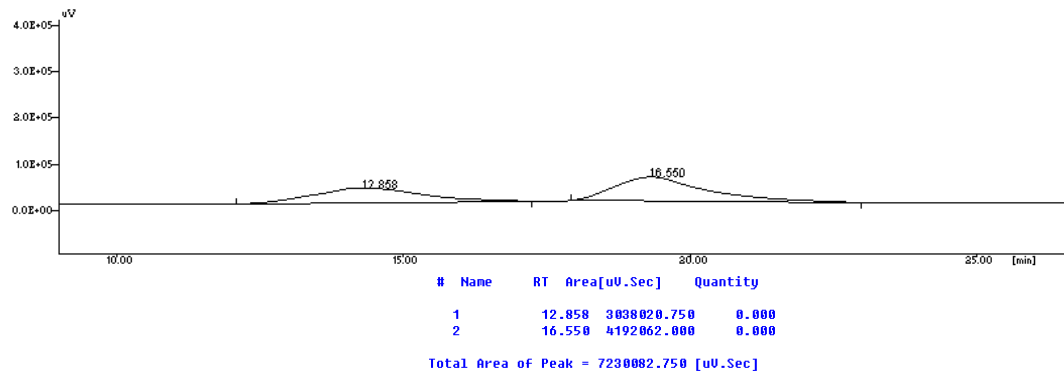

SI Table 3-2

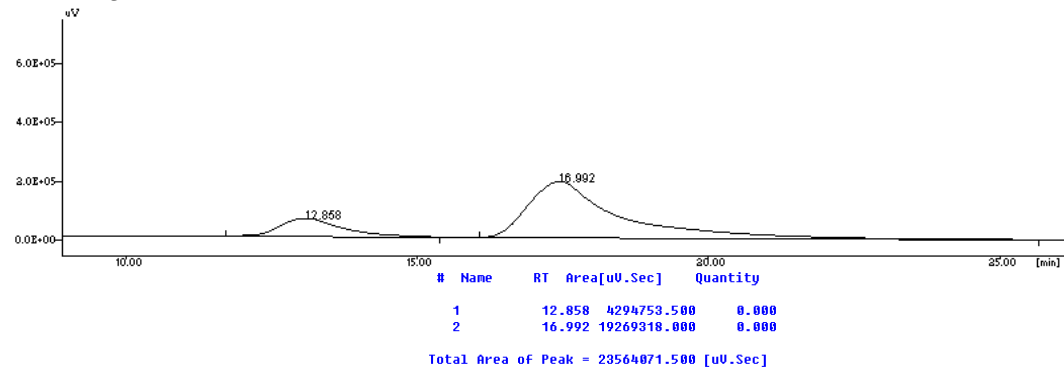

SI Table 3-3

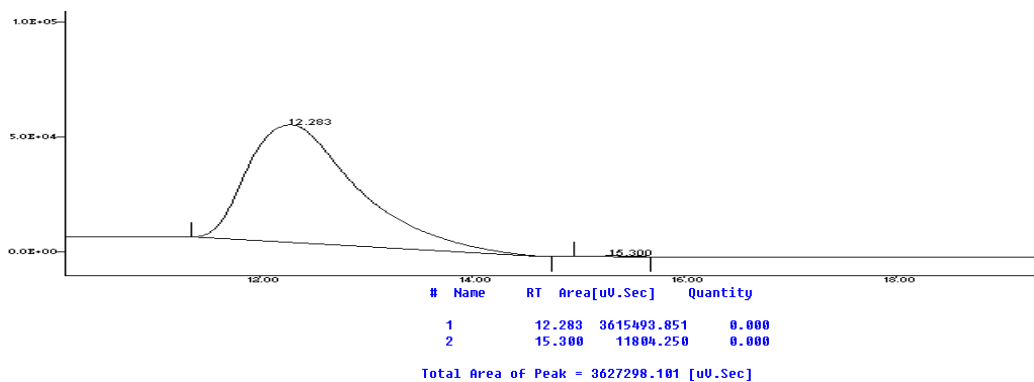

SI Table 3-4

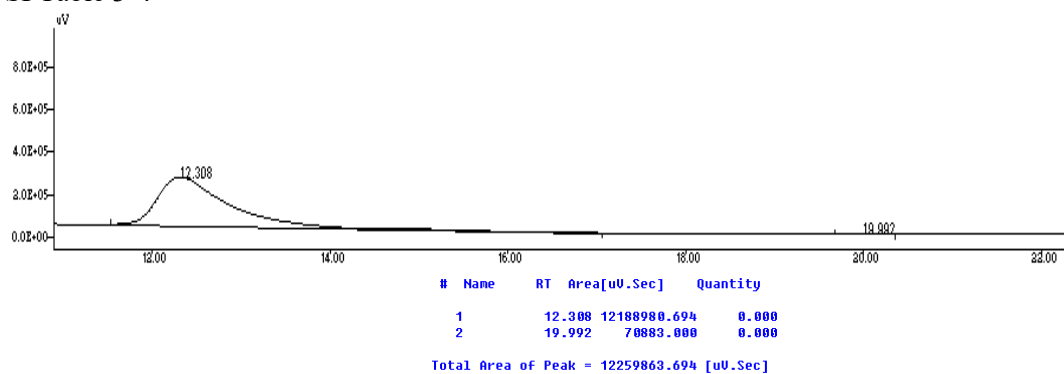

SI Table 3-5

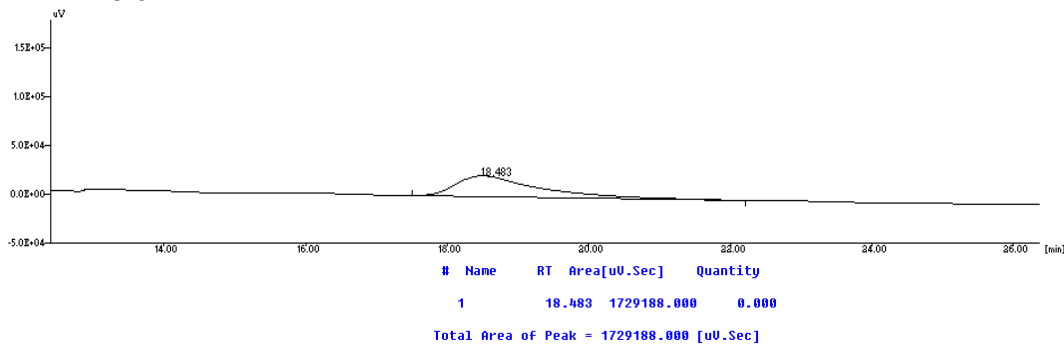

SI Table 3-6

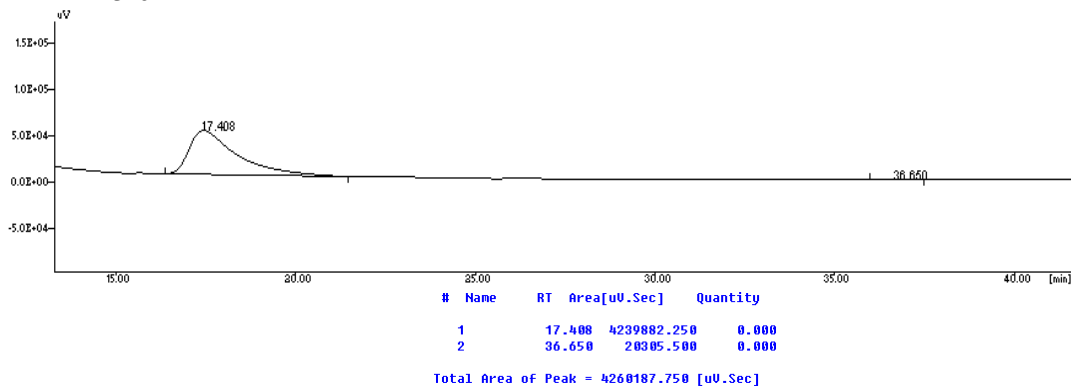

SI Table 3-7

racemic

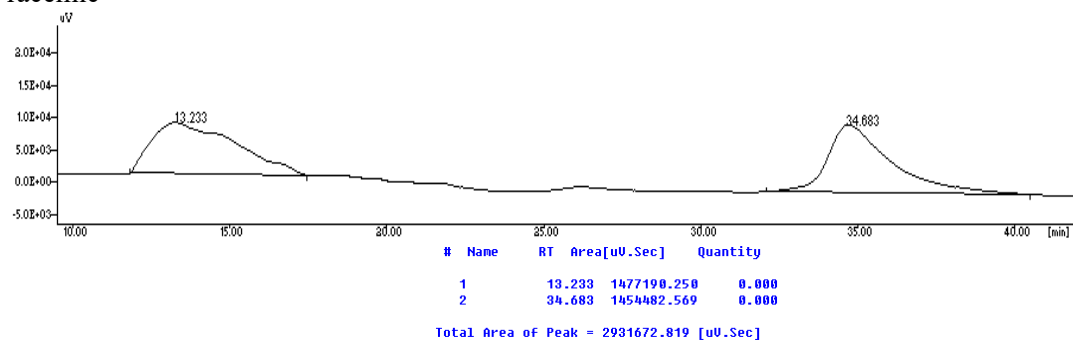

asymmetric

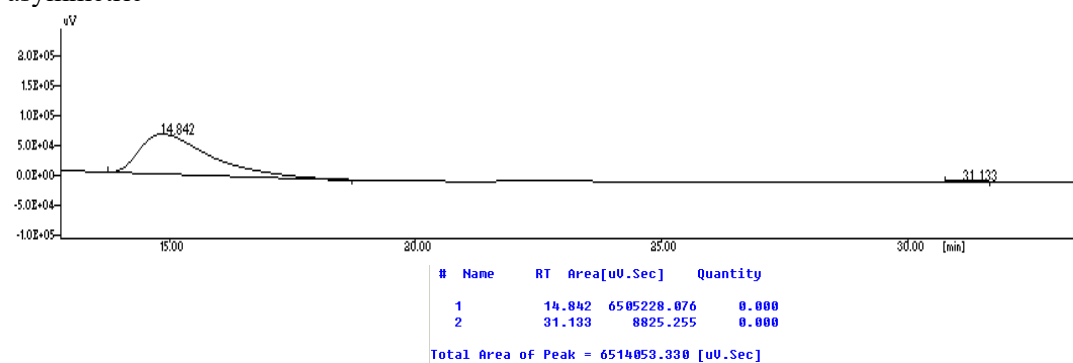

SI Table 4-1

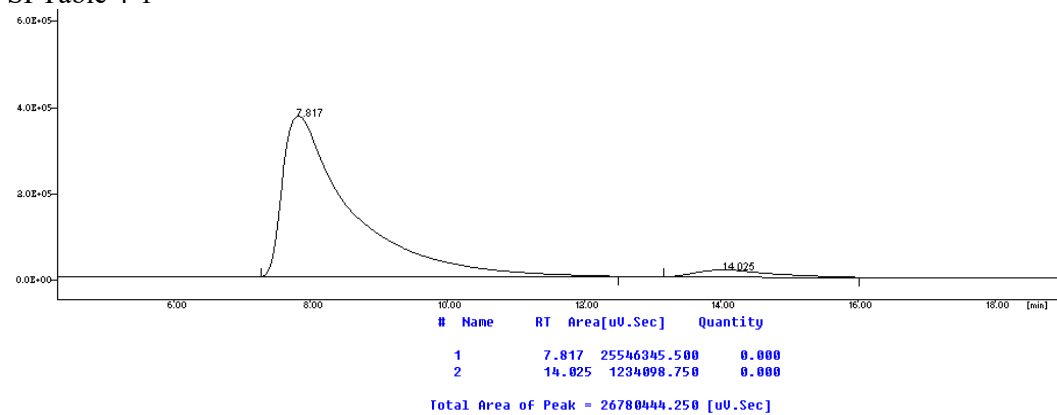

SI Table 4-2

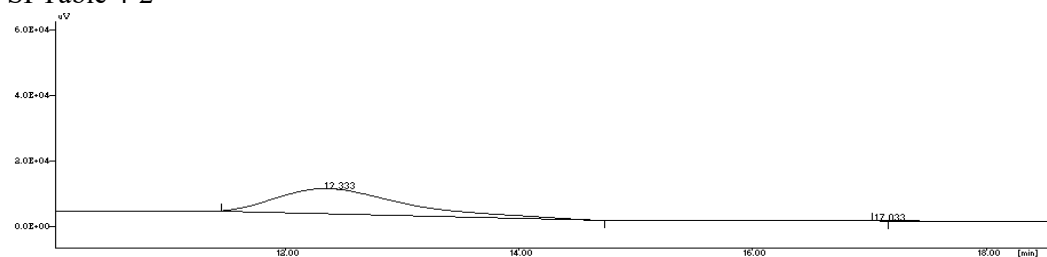

| # | Name | RT     | Area[uV.Sec] | Quantity |
|---|------|--------|--------------|----------|
| 1 |      | 12.333 | 580025.591   | 0.000    |
| 2 |      | 17.033 | 83.625       | 0.000    |

Total Area of Peak = 580109.216 [uV.Sec]

SI Table 4-3

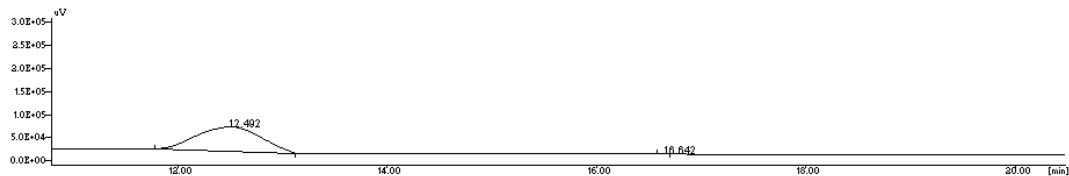

| # | Name | RT     | Area[uV.Sec] | Quantity |
|---|------|--------|--------------|----------|
| 1 |      | 12.492 | 2247941.750  | 0.000    |
| 2 |      | 16.642 | 390.750      | 0.000    |

Total Area of Peak = 2248332.500 [uV.Sec]

SI Table 4-4

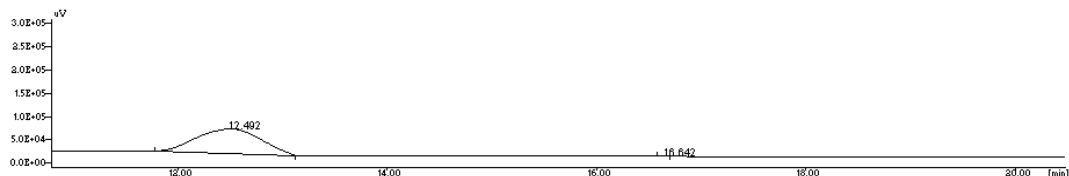

| # | Name | RT     | Area[uV.Sec] | Quantity |
|---|------|--------|--------------|----------|
| 1 |      | 12.492 | 2247941.750  | 0.000    |
| 2 |      | 16.642 | 390.750      | 0.000    |

Total Area of Peak = 2248332.500 [uV.Sec]

SI Table 4-5

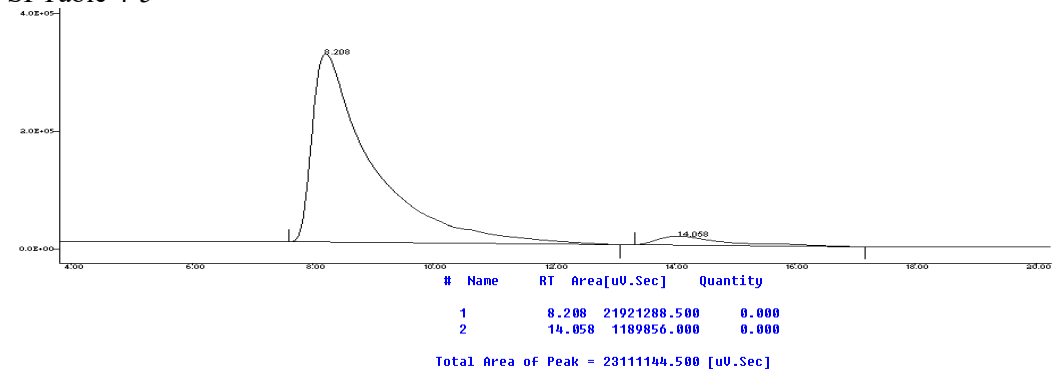

| # | Name | RT     | Area[uV.Sec] | Quantity |
|---|------|--------|--------------|----------|
| 1 |      | 8.208  | 21921288.500 | 0.000    |
| 2 |      | 14.058 | 1189856.000  | 0.000    |

Total Area of Peak = 23111144.500 [uV.Sec]

SI Table 4-6

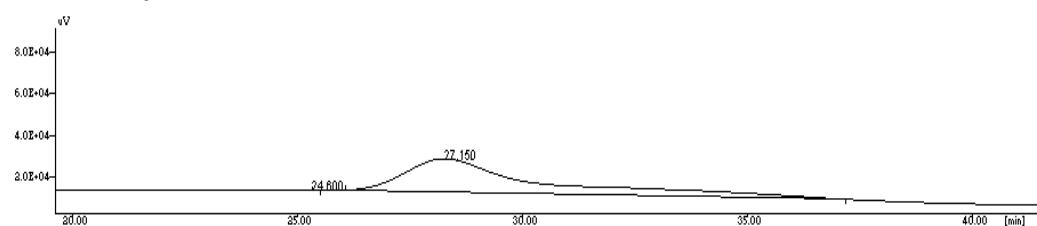

| # | Name | RT     | Area[uV.Sec] | Quantity |
|---|------|--------|--------------|----------|
| 1 |      | 24.600 | 31.500       | 0.000    |
| 2 |      | 27.150 | 2867886.500  | 0.000    |

Total Area of Peak = 2867918.000 [uV.Sec]

SI Table 4-7

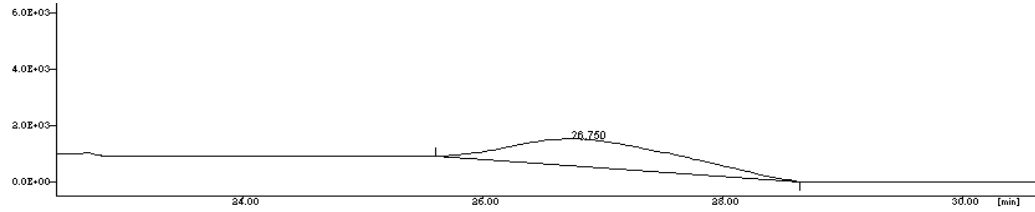

| # | Name | RT     | Area[uV.Sec] | Quantity |
|---|------|--------|--------------|----------|
| 1 |      | 26.750 | 94661.455    | 0.000    |

Total Area of Peak = 94661.455 [uV.Sec]

SI Table 4-8

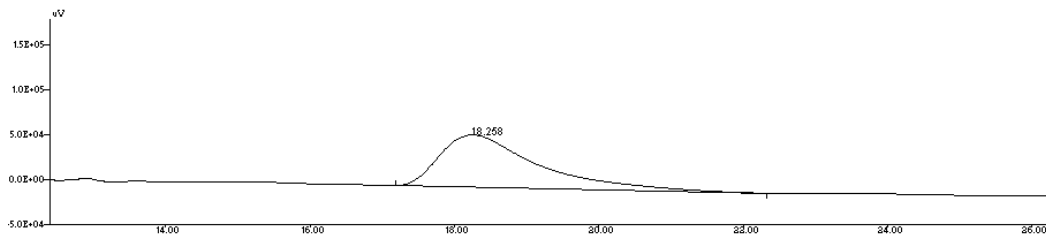

| # | Name | RT     | Area[uV.Sec] | Quantity |
|---|------|--------|--------------|----------|
| 1 |      | 18.258 | 5471407.250  | 0.000    |

Total Area of Peak = 5471407.250 [uV.Sec]

SI Table 4-9

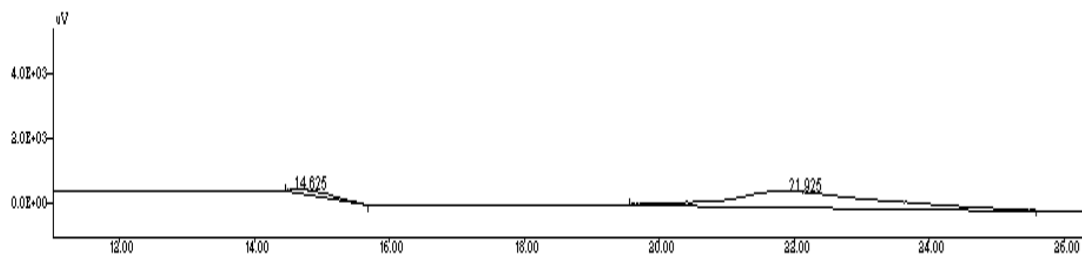

| # | Name | RT     | Area[uV.Sec] | Quantity |
|---|------|--------|--------------|----------|
| 1 |      | 14.625 | 5413.750     | 0.000    |
| 2 |      | 21.925 | 71422.801    | 0.000    |

Total Area of Peak = 76836.551 [uV.Sec]

SI Table 5-1

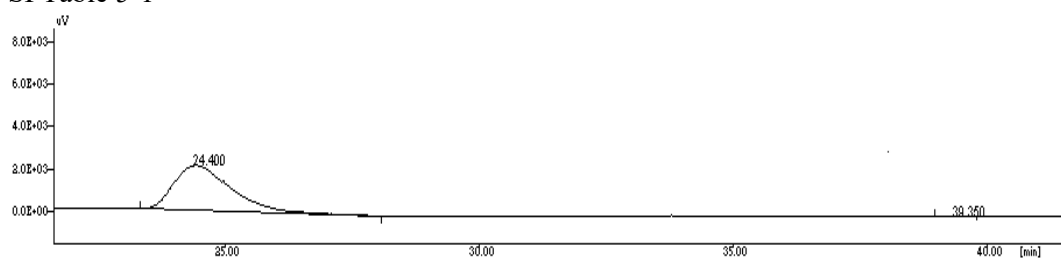

| #                                        | Name | RT     | Area[uV.Sec] | Quantity |
|------------------------------------------|------|--------|--------------|----------|
| 1                                        |      | 24.400 | 164065.859   | 0.000    |
| 2                                        |      | 39.350 | 753.500      | 0.000    |
| Total Area of Peak = 164819.359 [uV.Sec] |      |        |              |          |

SI Table 5-2

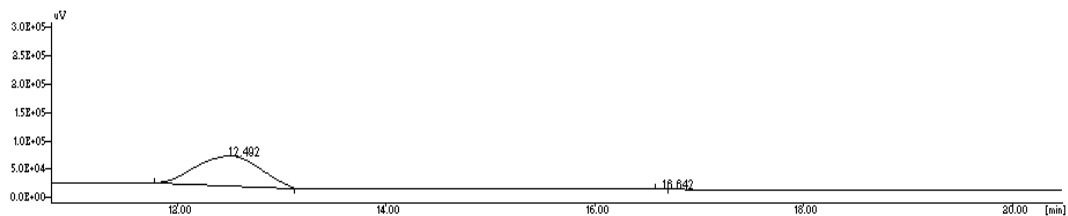

| #                                         | Name | RT     | Area[uV.Sec] | Quantity |
|-------------------------------------------|------|--------|--------------|----------|
| 1                                         |      | 12.492 | 2247941.750  | 0.000    |
| 2                                         |      | 16.642 | 390.750      | 0.000    |
| Total Area of Peak = 2248332.500 [uV.Sec] |      |        |              |          |

SI Table 5-3

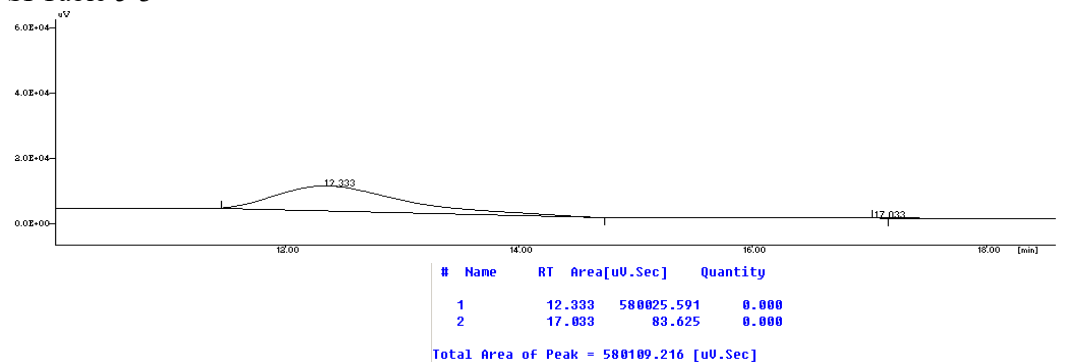

| #                                        | Name | RT     | Area[uV.Sec] | Quantity |
|------------------------------------------|------|--------|--------------|----------|
| 1                                        |      | 12.333 | 580025.591   | 0.000    |
| 2                                        |      | 17.033 | 83.625       | 0.000    |
| Total Area of Peak = 580109.216 [uV.Sec] |      |        |              |          |

SI Table 5-4

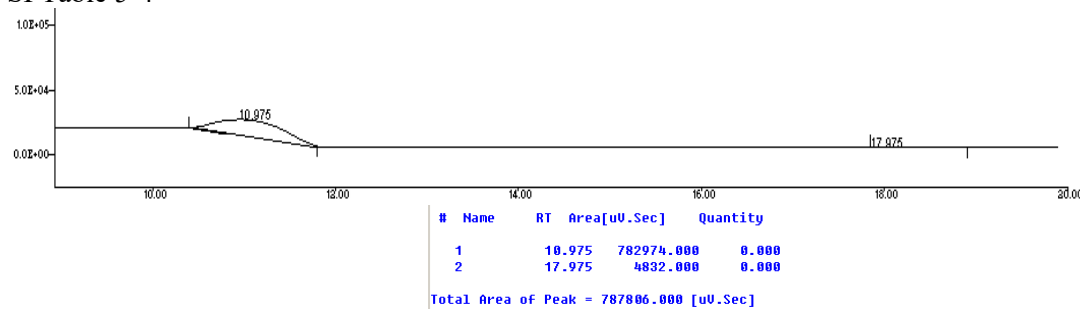

| #                                        | Name | RT     | Area[uV.Sec] | Quantity |
|------------------------------------------|------|--------|--------------|----------|
| 1                                        |      | 10.975 | 782974.000   | 0.000    |
| 2                                        |      | 17.975 | 4832.000     | 0.000    |
| Total Area of Peak = 787806.000 [uV.Sec] |      |        |              |          |

Fig. 2b-2m

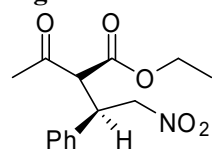

Racemic



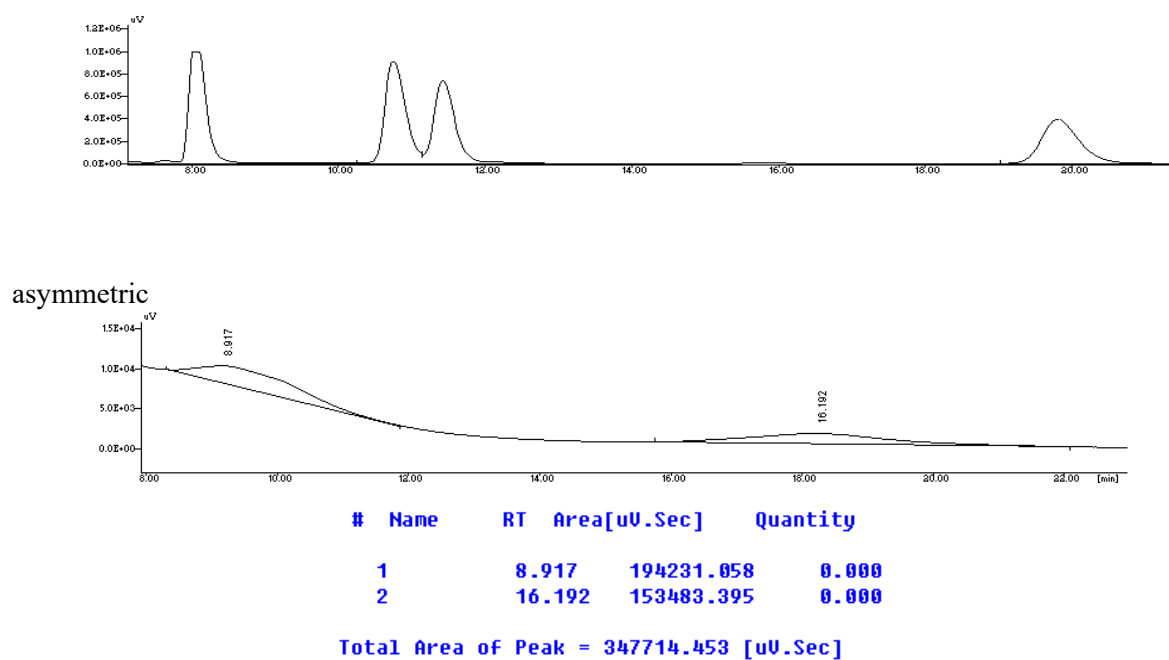

Fig. 2b-2o

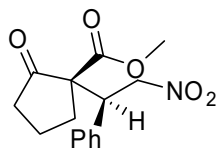

Racemic

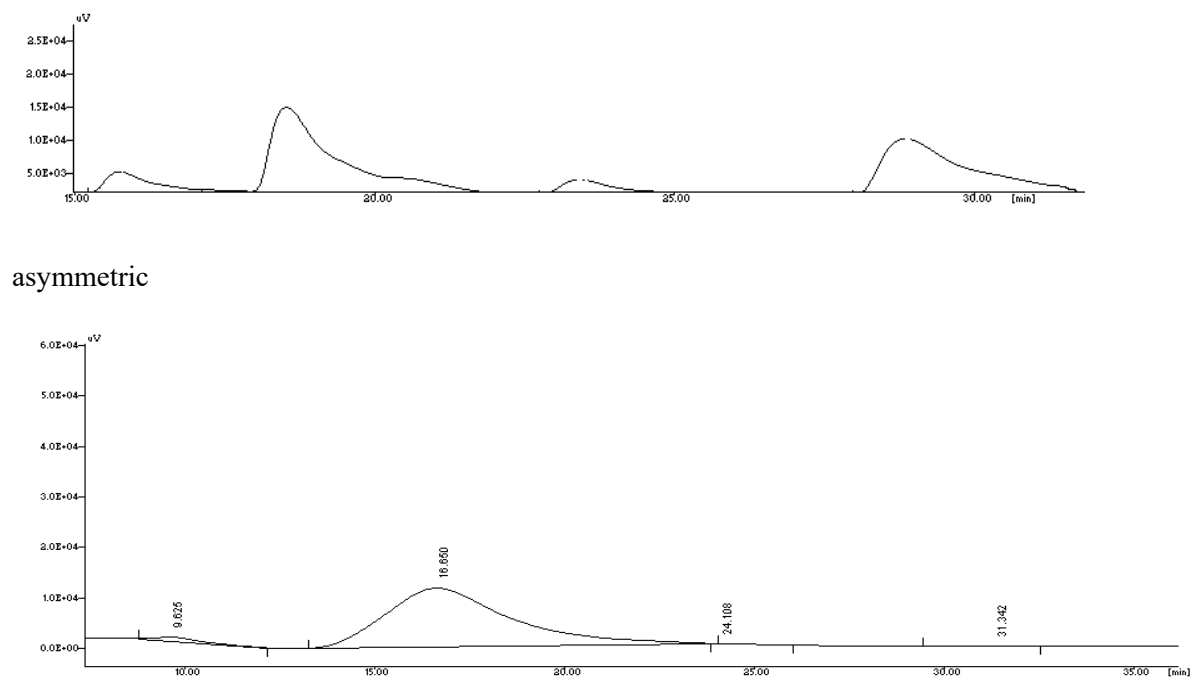

| # | Name | RT     | Area[uV.Sec] | Quantity |
|---|------|--------|--------------|----------|
| 1 |      | 9.625  | 56432.025    | 0.000    |
| 2 |      | 16.650 | 2633157.636  | 0.000    |
| 3 |      | 24.108 | 1256.584     | 0.000    |
| 4 |      | 31.342 | 3908.821     | 0.000    |

Total Area of Peak = 2694755.065 [uV.Sec]

**Fig. 2b-2n**

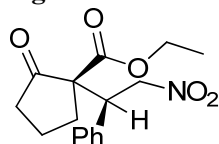

Racemic

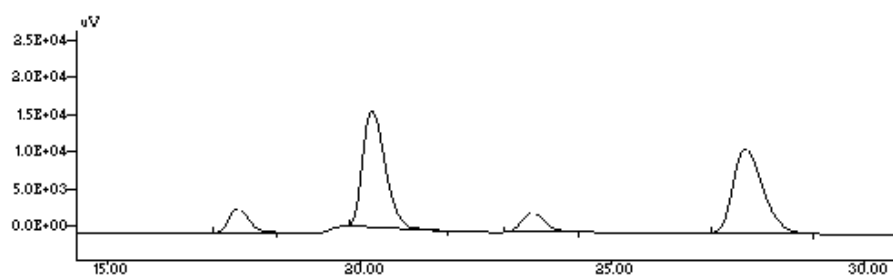

asymmetric

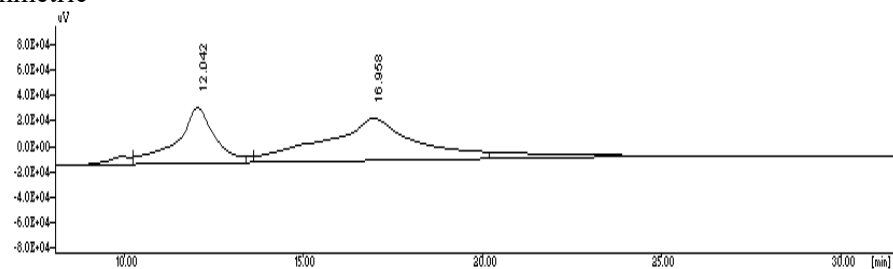

| # | Name | RT     | Area[uV.Sec] | Quantity |
|---|------|--------|--------------|----------|
| 1 |      | 12.042 | 3208268.903  | 0.000    |
| 2 |      | 16.958 | 5774614.138  | 0.000    |

Total Area of Peak = 8982883.041 [uV.Sec]

**Fig. 2b-2p**

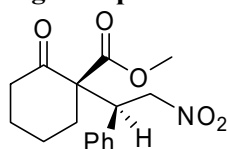

Racemic

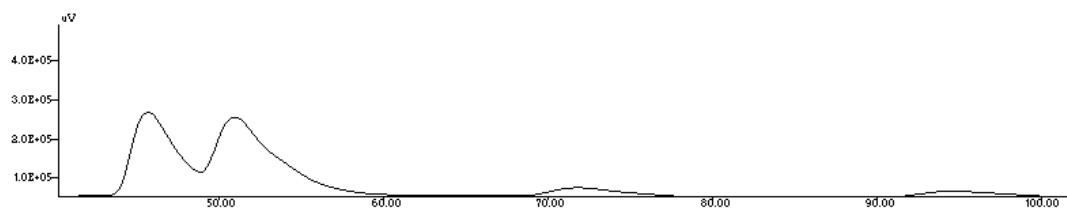

asymmetric

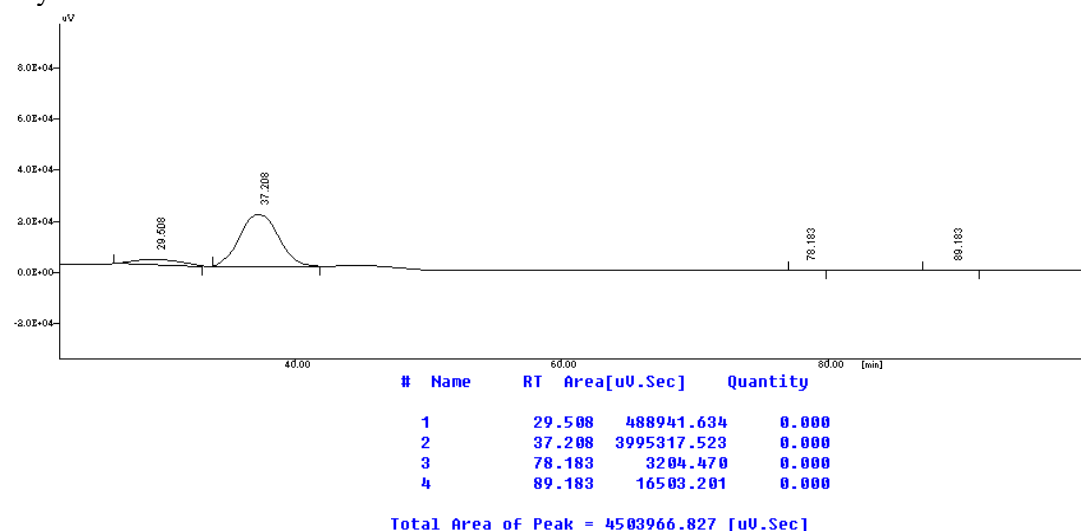

Fig. 2c-2a

racemic

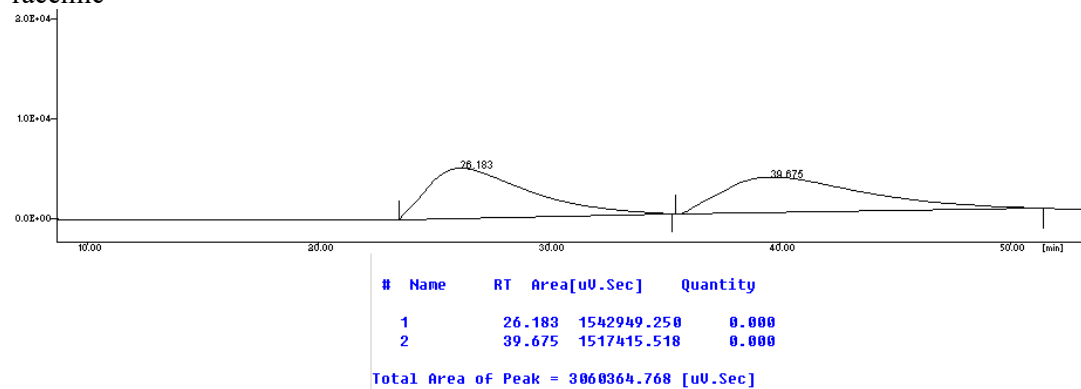

asymmetric

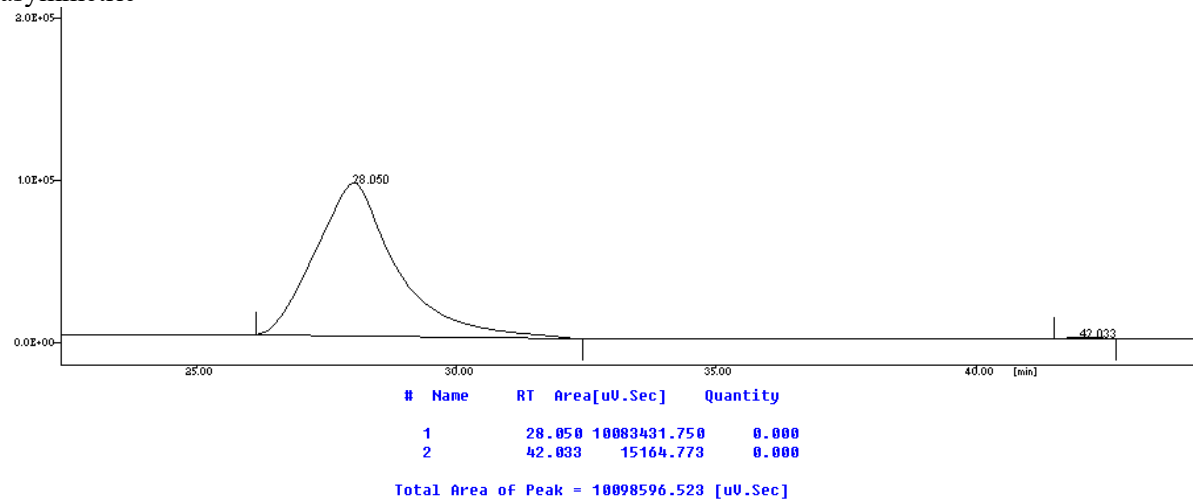

**Fig. 2c-2c**

racemic

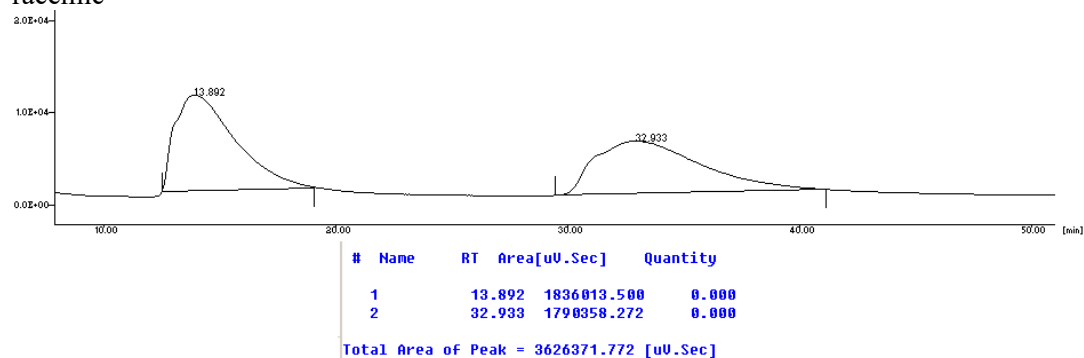

asymmetric

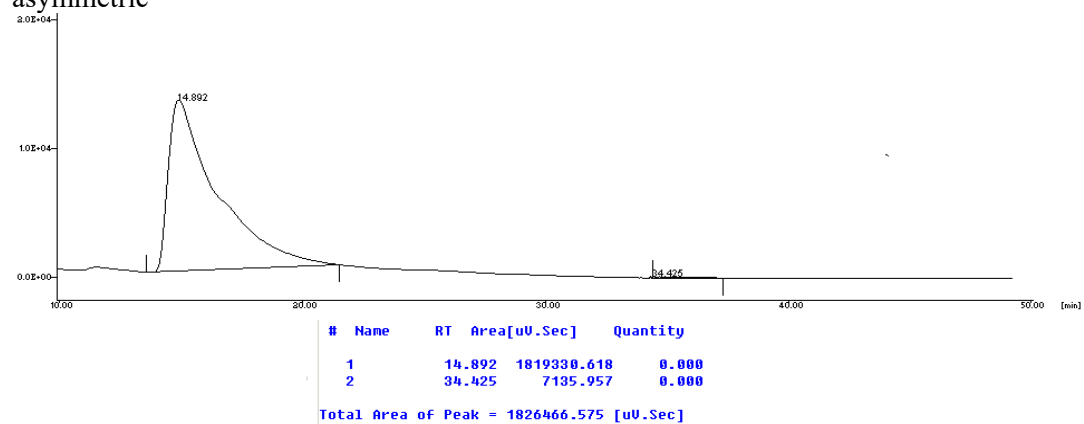

**Fig. 2c-2d**

racemic

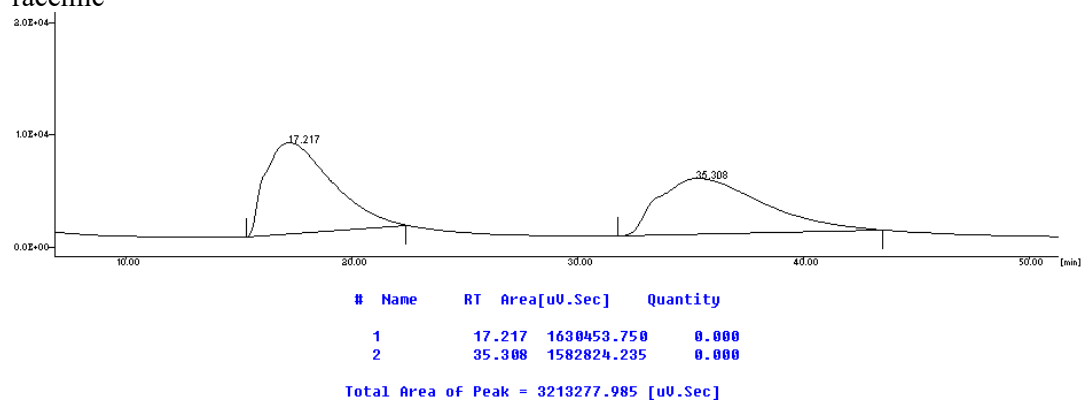

asymmetric

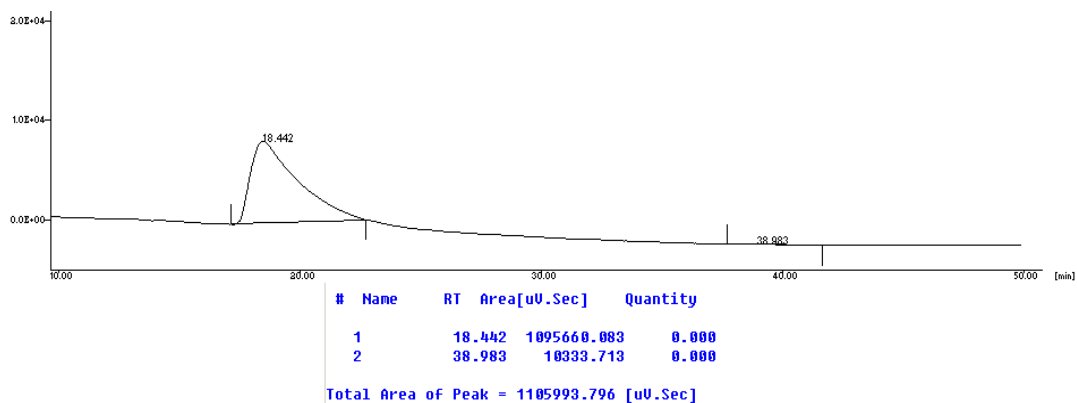

**Fig. 2c-2f**

racemic

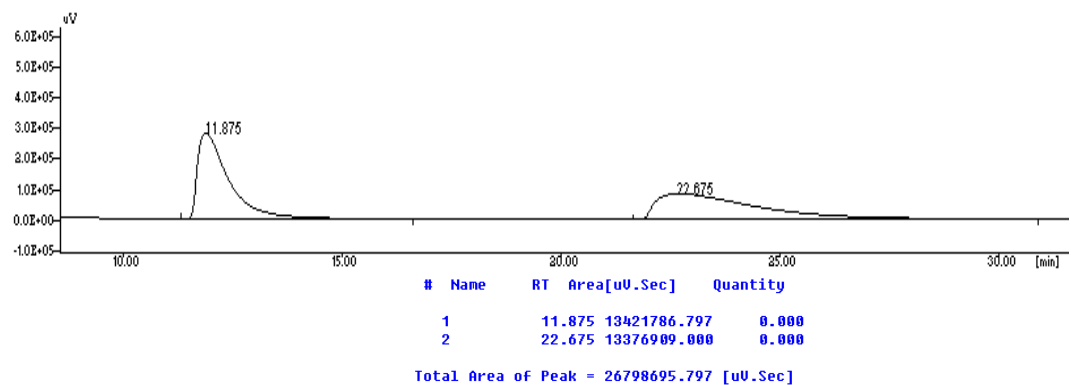

asymmetric

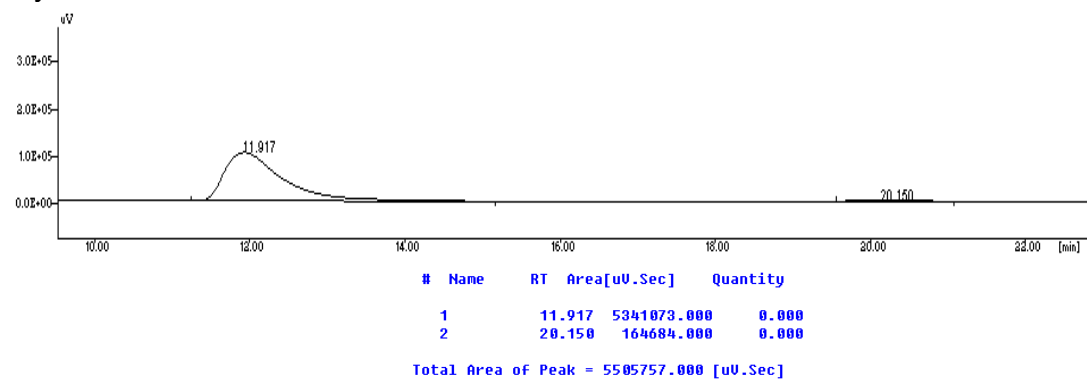

**Fig. 2c-2g**

racemic

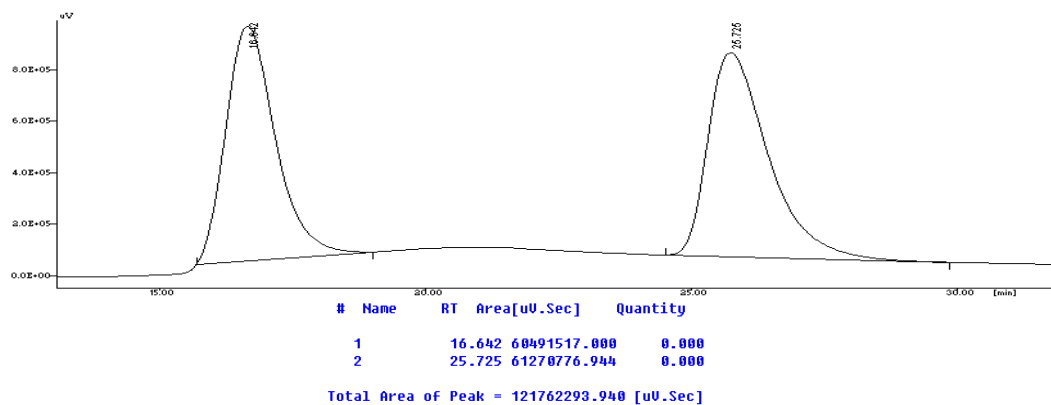

asymmetric

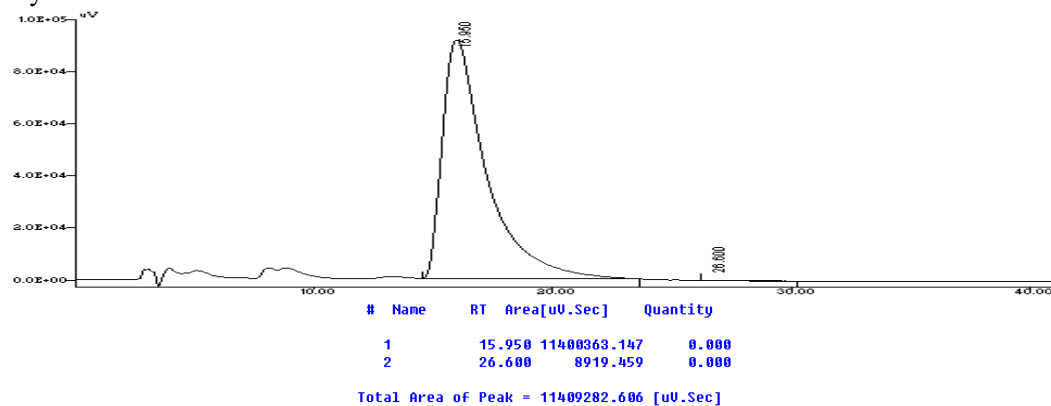

Fig. 2c-2h

racemic

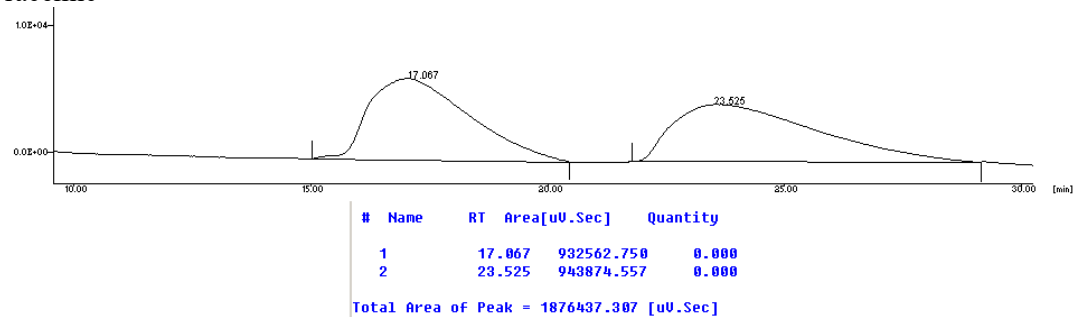

asymmetric

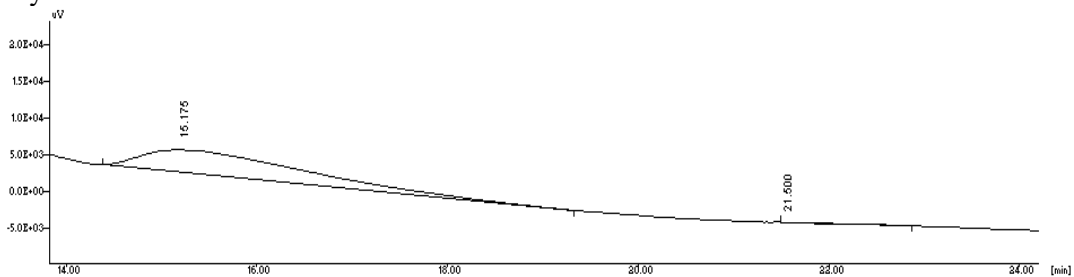

| #                                        | Name | RT     | Area[uV.Sec] | Quantity |
|------------------------------------------|------|--------|--------------|----------|
| 1                                        |      | 15.175 | 376171.659   | 0.000    |
| 2                                        |      | 21.500 | 1239.500     | 0.000    |
| Total Area of Peak = 377411.159 [uV.Sec] |      |        |              |          |

Fig. 2c-2i

racemic

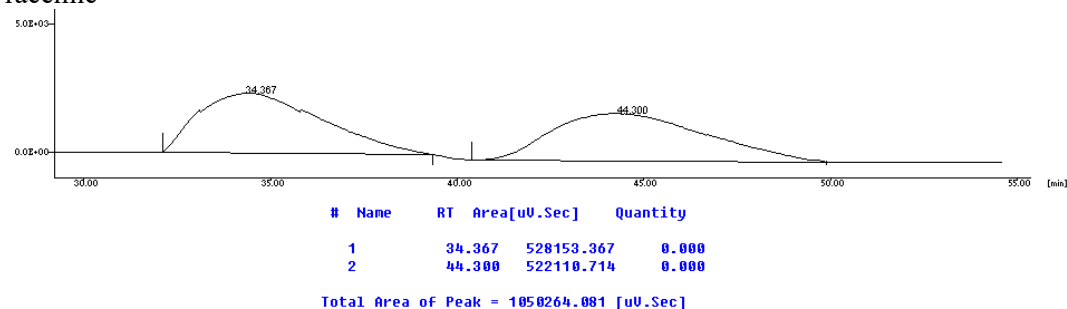

asymmetric

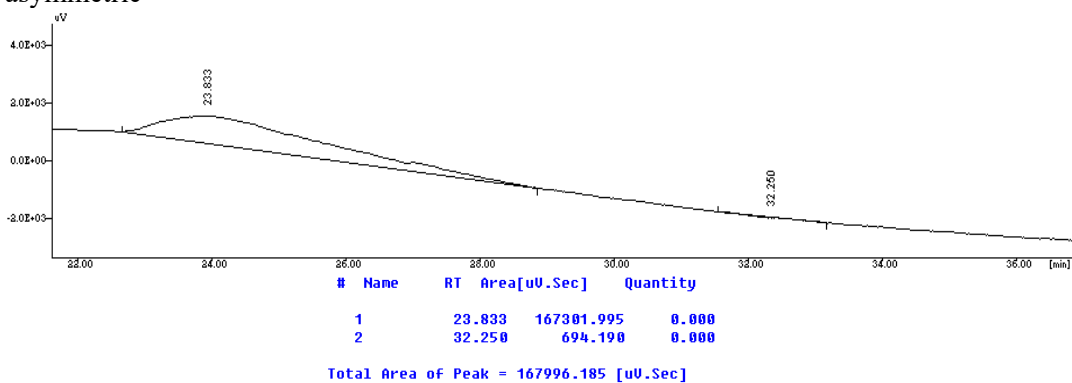

Fig. 2c-2k

racemic

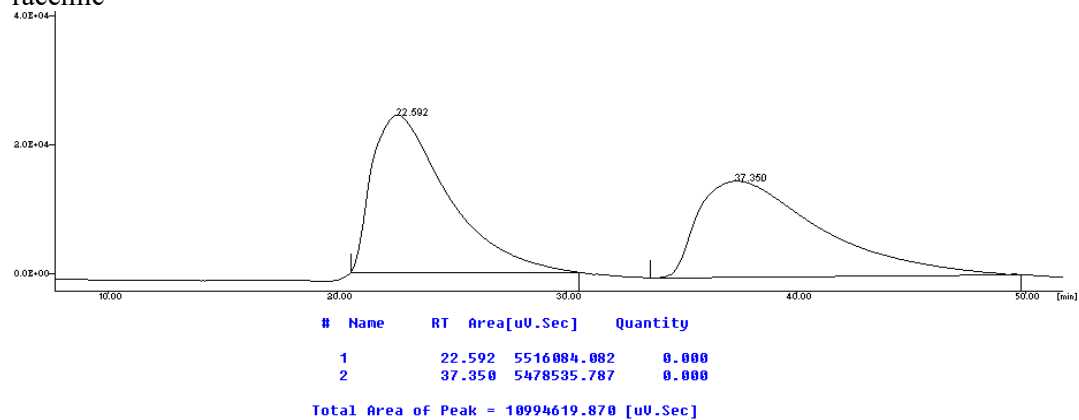

asymmetric

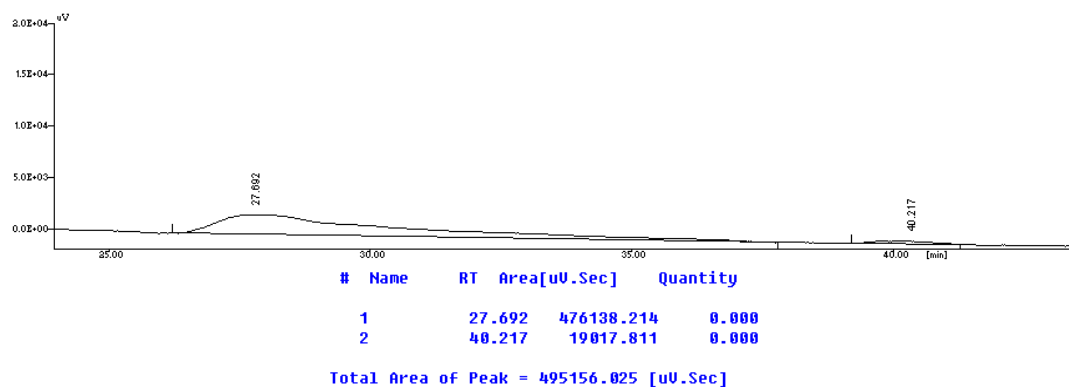

Fig. 2c-2i

racemic

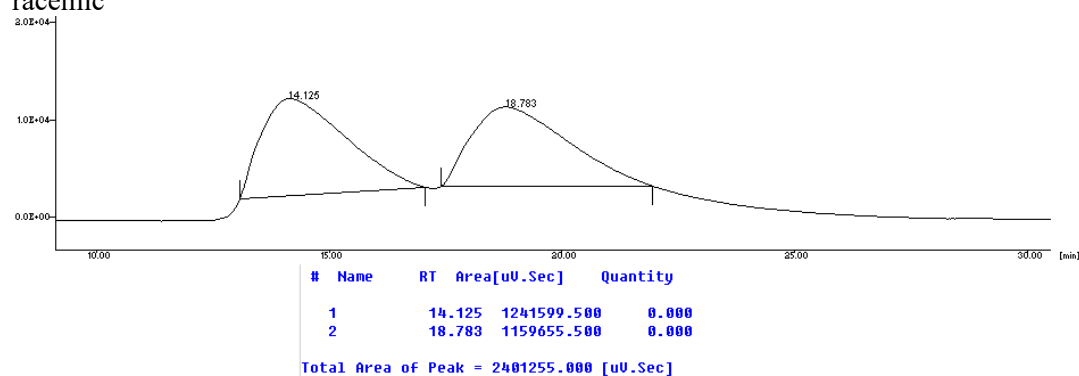

asymmetric

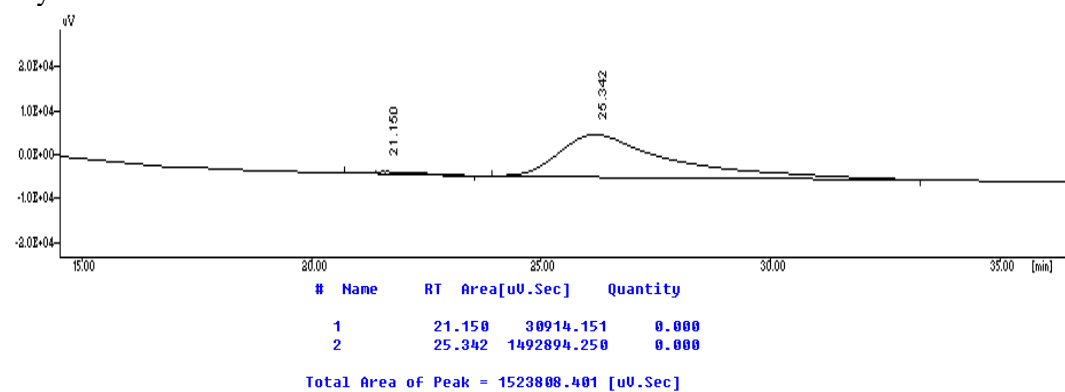

Fig. 2c-2j

racemic



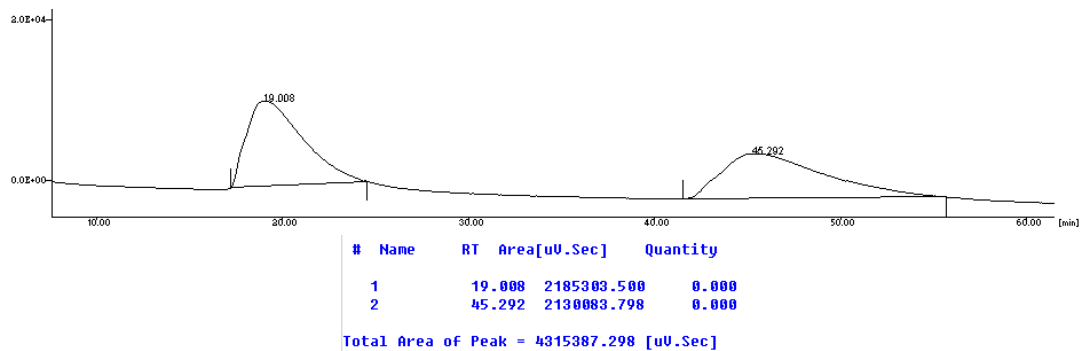

asymmetric

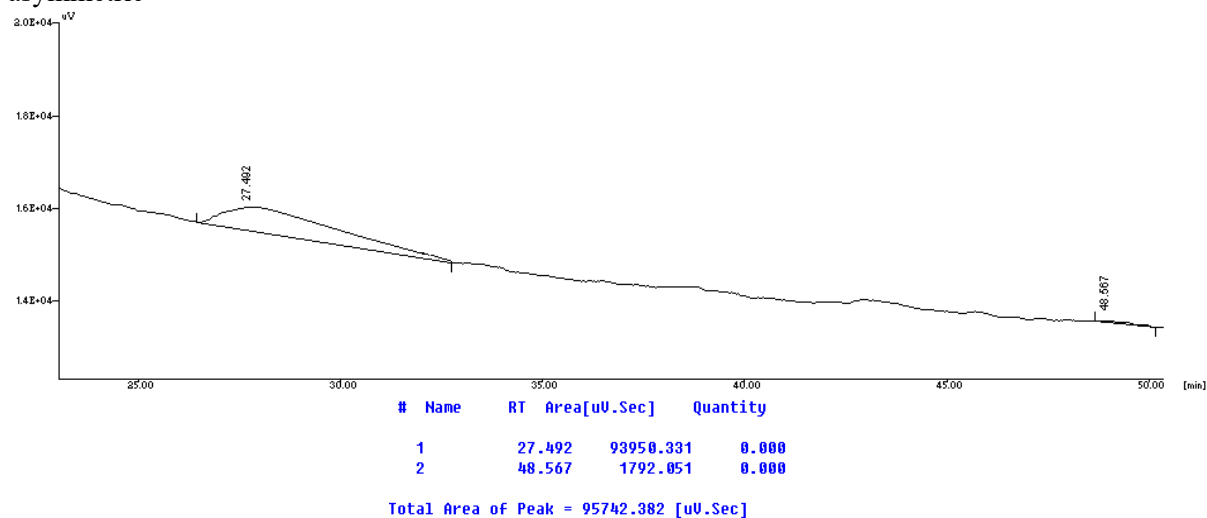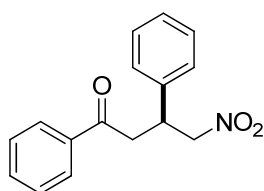

3a

Racemic

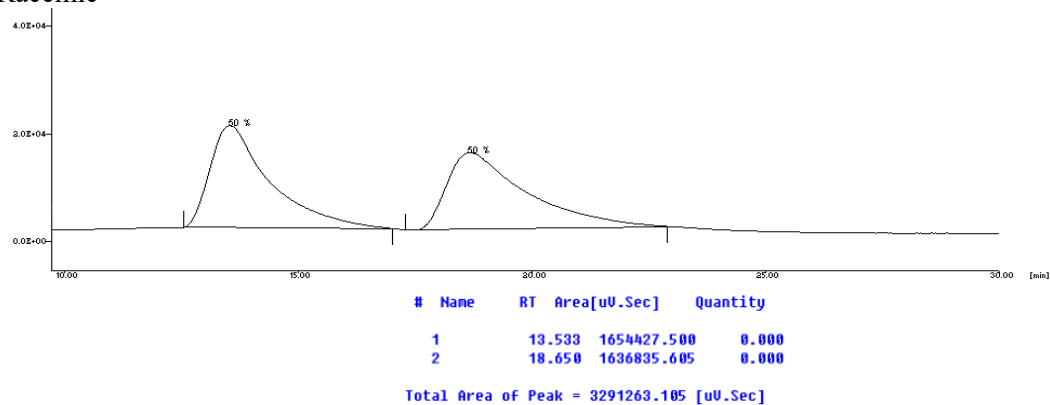

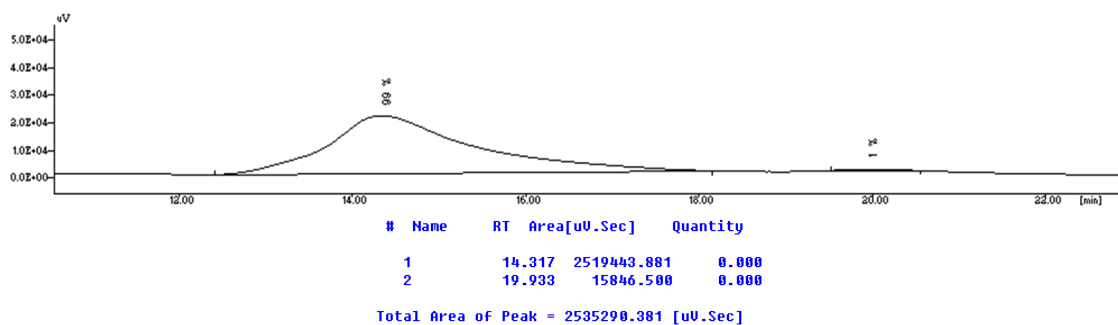

**3b**

Racemic

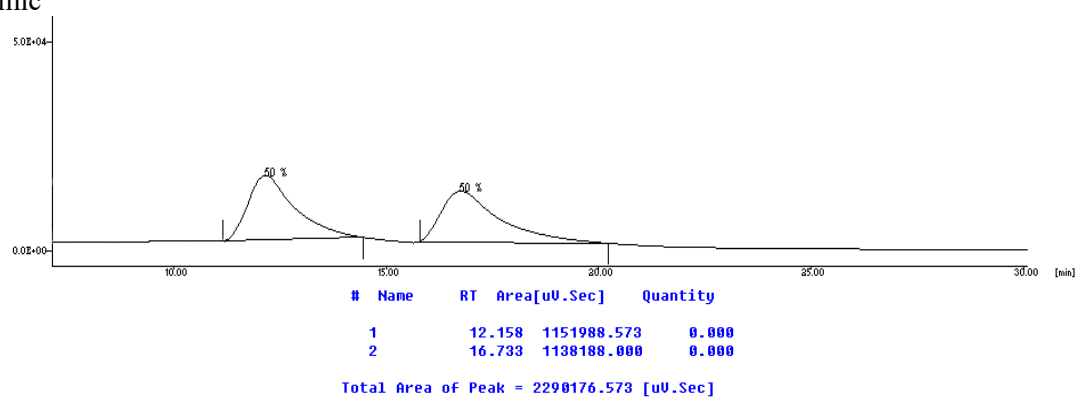

Asymmetric

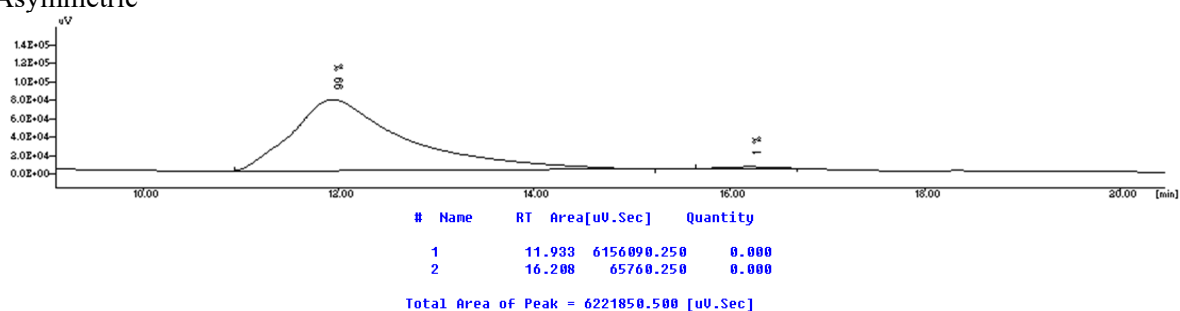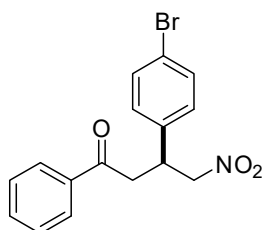

3c

Racemic

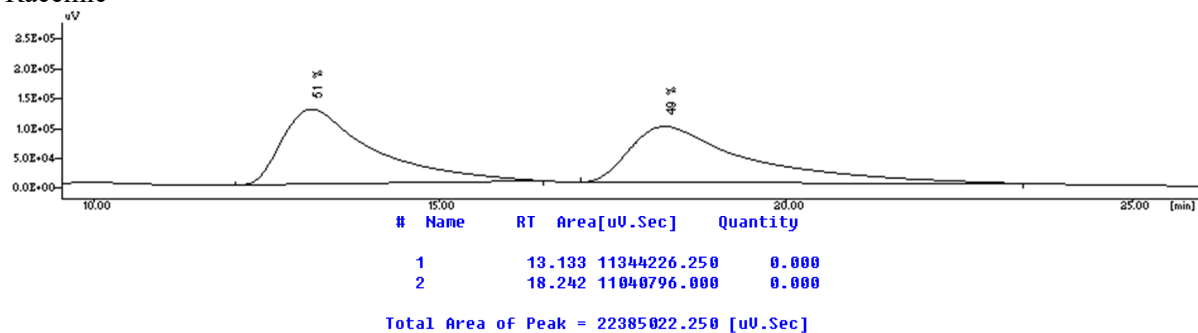

Asymmetric

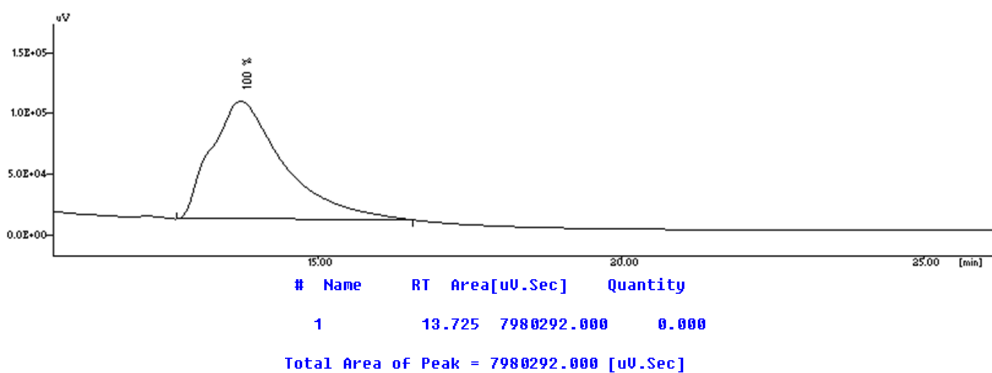

Table 7, entry 3

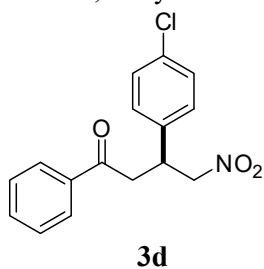

Racemic

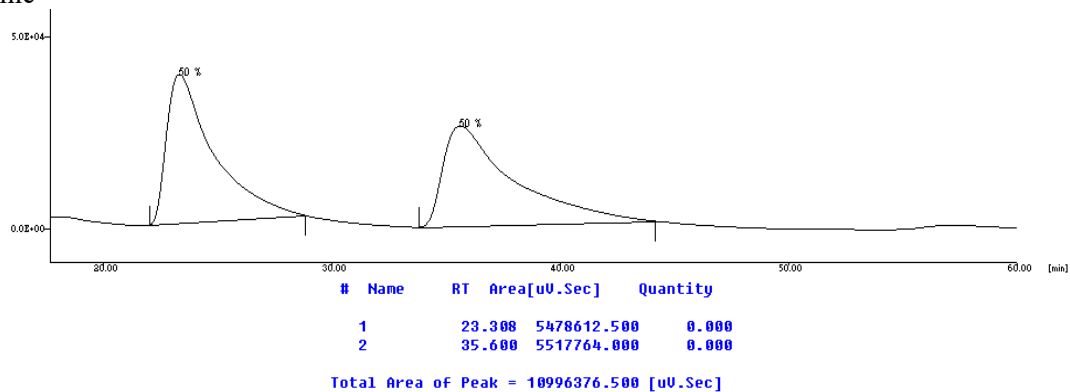

Asymmetric

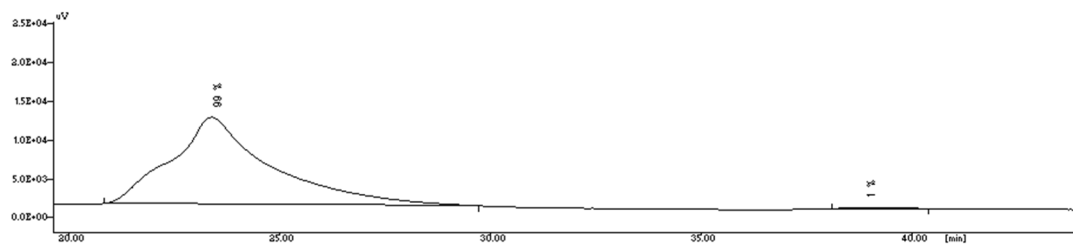

| # | Name | RT     | Area[uV.Sec] | Quantity |
|---|------|--------|--------------|----------|
| 1 |      | 23.400 | 1818559.000  | 0.000    |
| 2 |      | 38.883 | 9253.723     | 0.000    |

Total Area of Peak = 1827812.723 [uV.Sec]

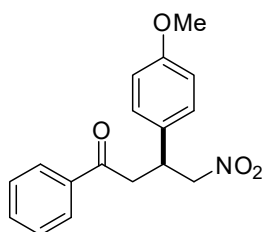

**3e**

Racemic

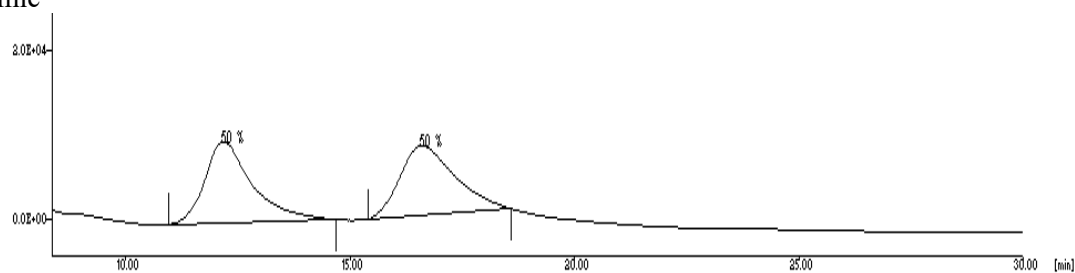

| # | Name | RT     | Area[uV.Sec] | Quantity |
|---|------|--------|--------------|----------|
| 1 |      | 12.150 | 688459.962   | 0.000    |
| 2 |      | 16.550 | 702212.750   | 0.000    |

Total Area of Peak = 1390672.712 [uV.Sec]

Asymmetric

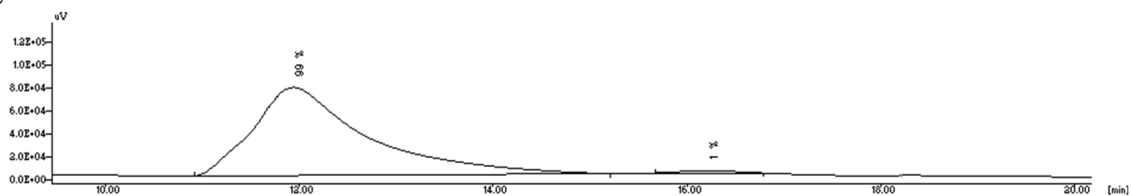

| # | Name | RT     | Area[uV.Sec] | Quantity |
|---|------|--------|--------------|----------|
| 1 |      | 11.933 | 6194063.500  | 0.000    |
| 2 |      | 16.208 | 77154.750    | 0.000    |

Total Area of Peak = 6271218.250 [uV.Sec]

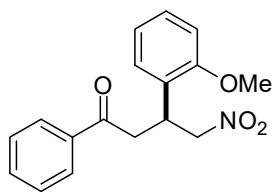

**3f**

Racemic

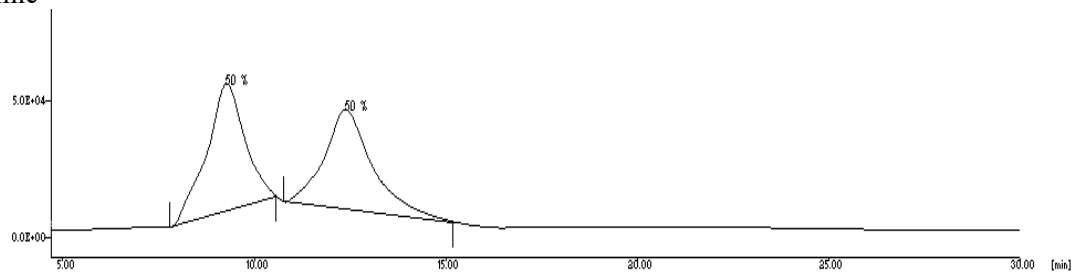

| # | Name | RT     | Area[uV.Sec] | Quantity |
|---|------|--------|--------------|----------|
| 1 |      | 9.258  | 3130431.565  | 0.000    |
| 2 |      | 12.367 | 3107225.040  | 0.000    |

Total Area of Peak = 6237656.605 [uV.Sec]

Asymmetric

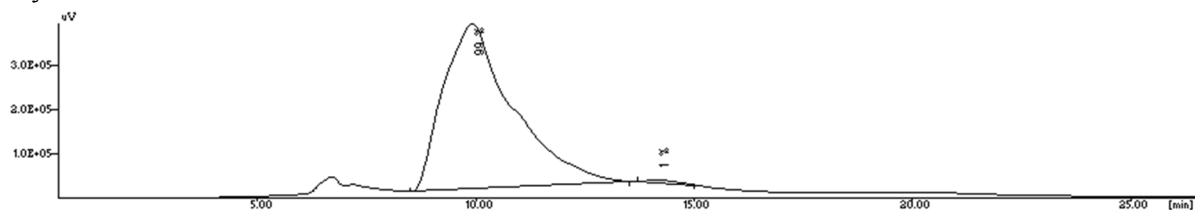

| # | Name | RT     | Area[uV.Sec] | Quantity |
|---|------|--------|--------------|----------|
| 1 |      | 9.908  | 40342558.053 | 0.000    |
| 2 |      | 14.133 | 261316.500   | 0.000    |

Total Area of Peak = 40603874.553 [uV.Sec]

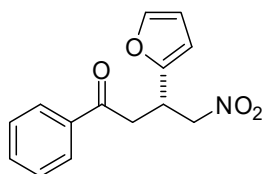

**3g**

Racemic

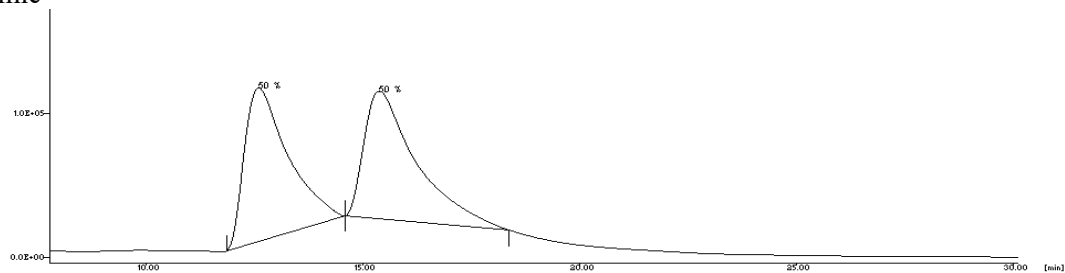

| # | Name | RT     | Area[uV.Sec] | Quantity |
|---|------|--------|--------------|----------|
| 1 |      | 12.600 | 7304910.284  | 0.000    |
| 2 |      | 15.383 | 7270880.500  | 0.000    |

Total Area of Peak = 14575790.784 [uV.Sec]

Asymmetric

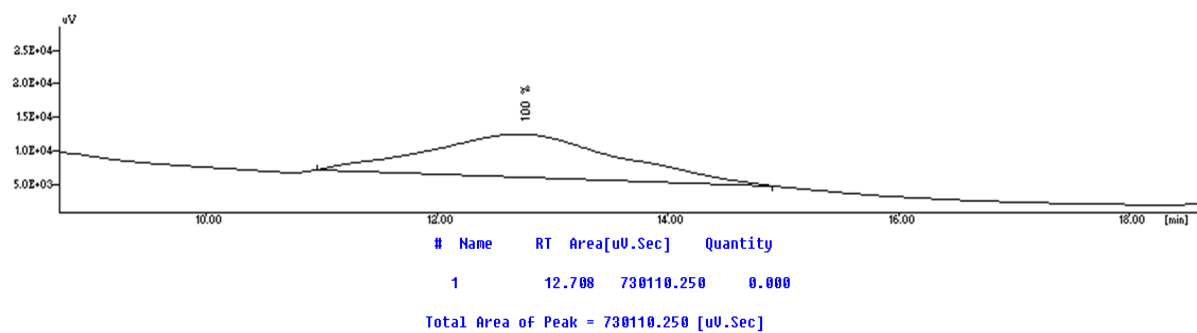

# Copy of NMR Spectra

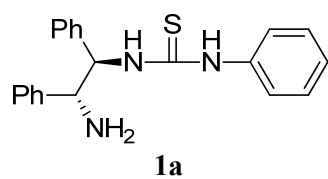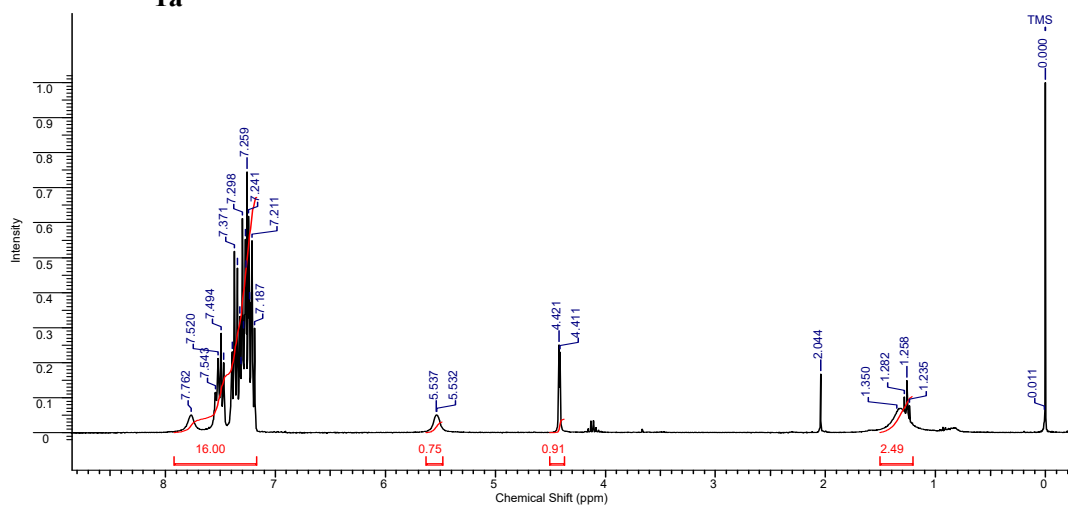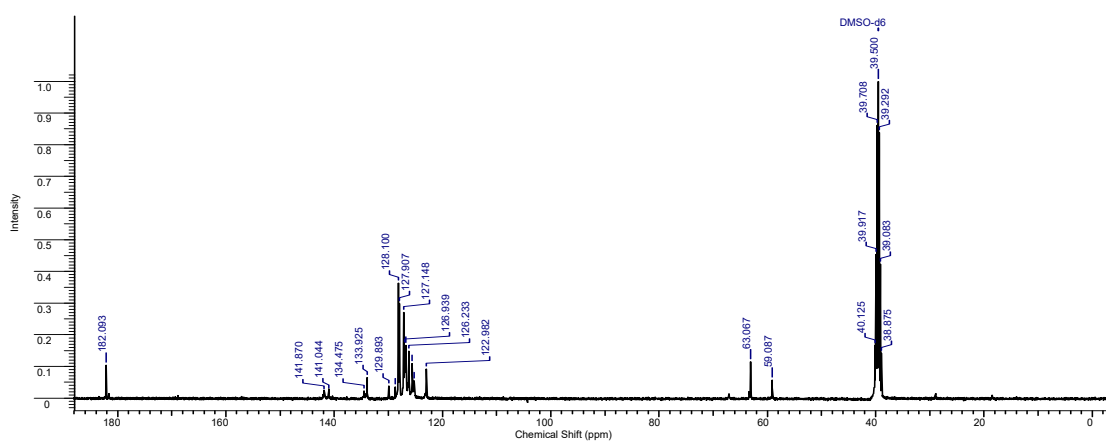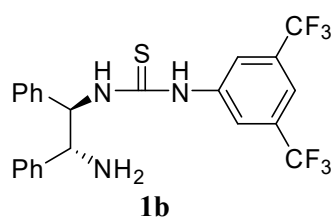

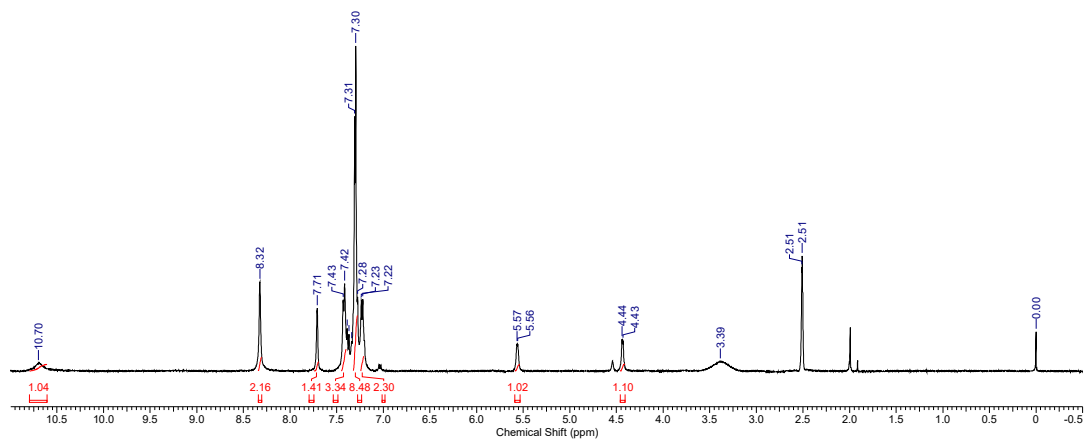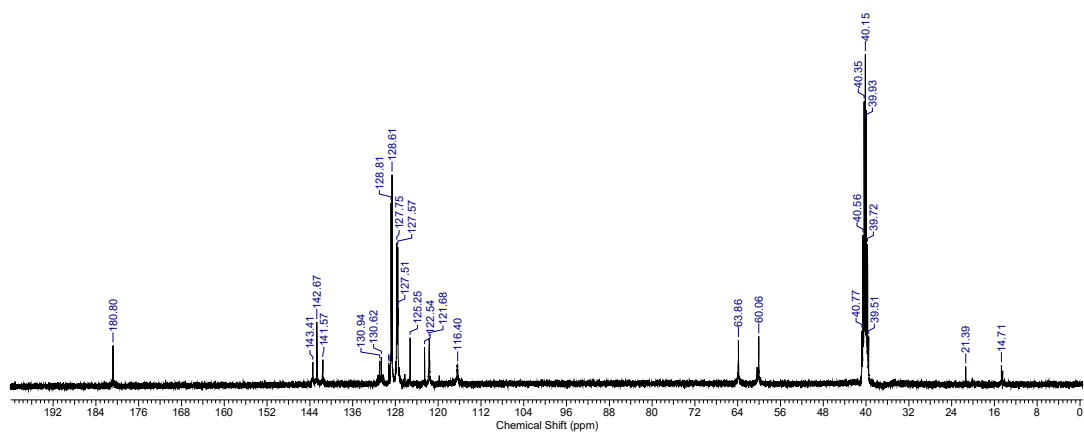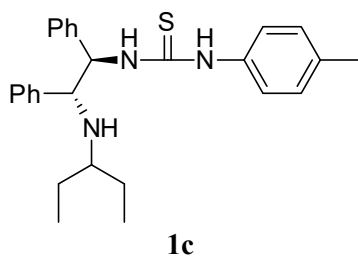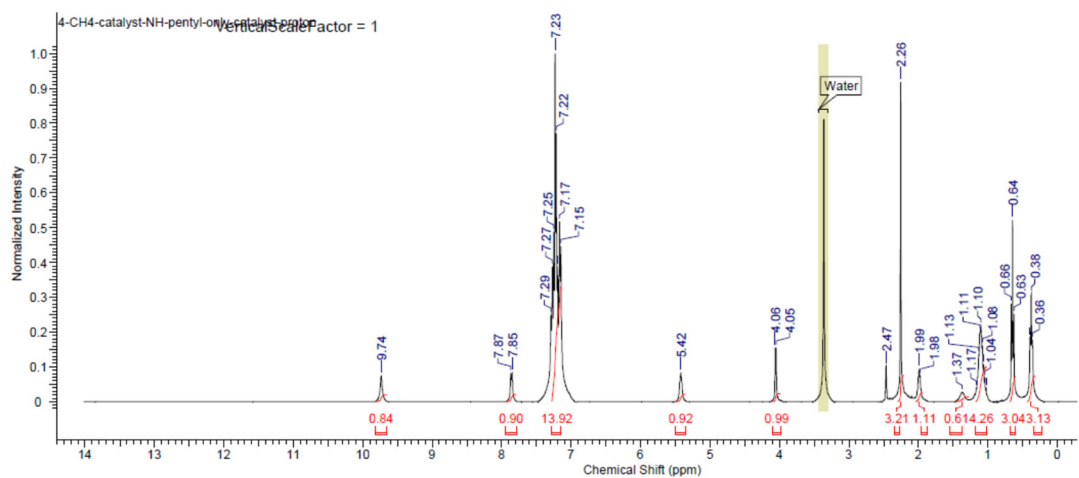



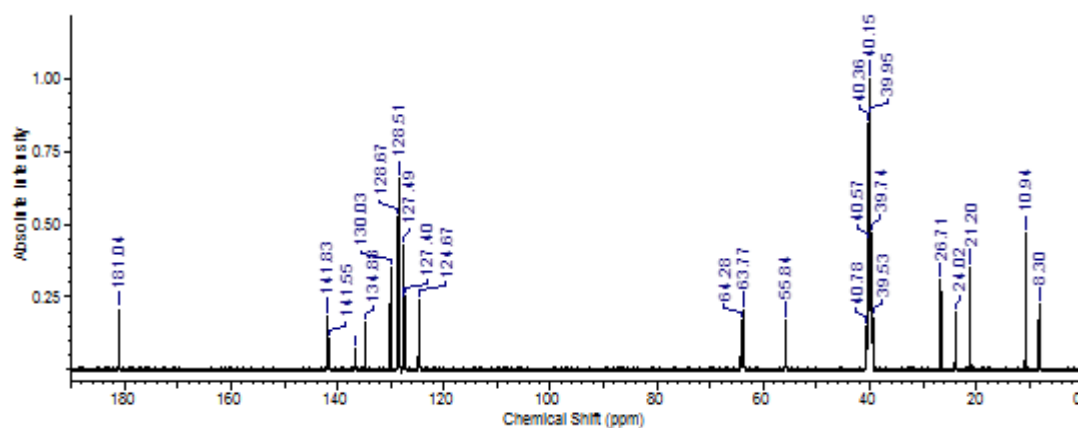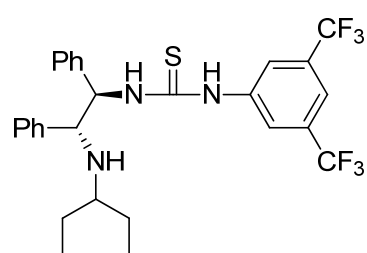

**1d**

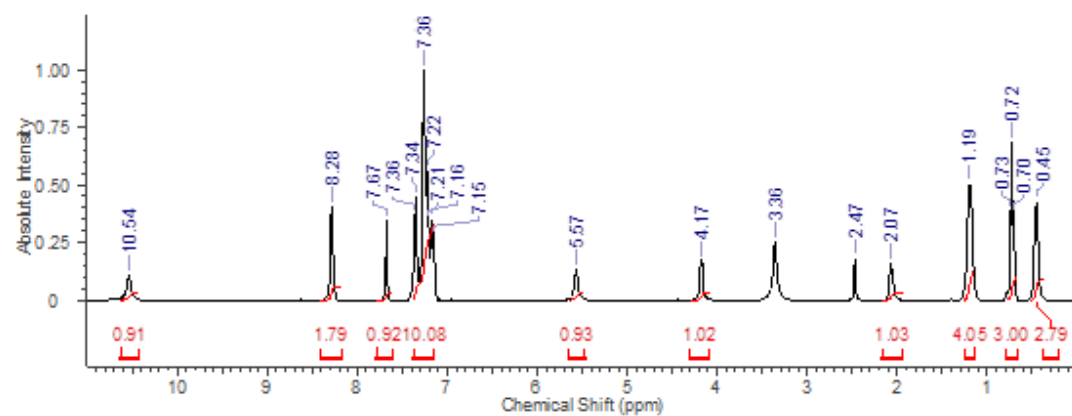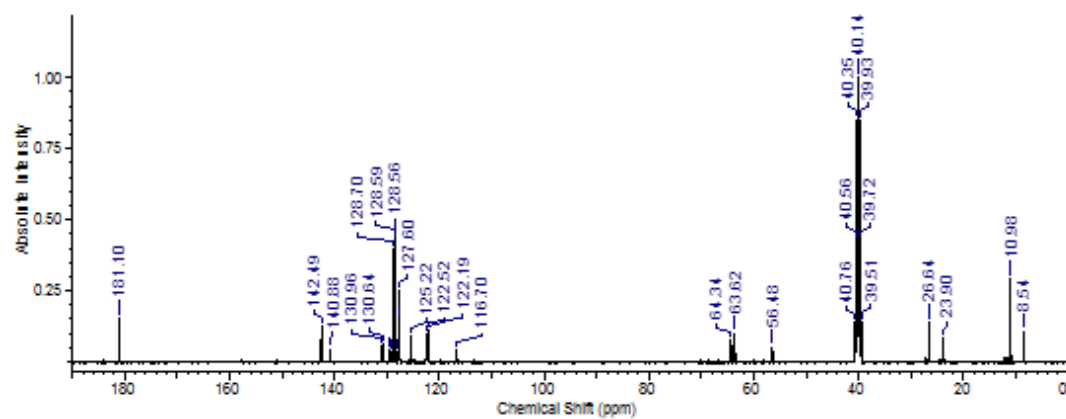

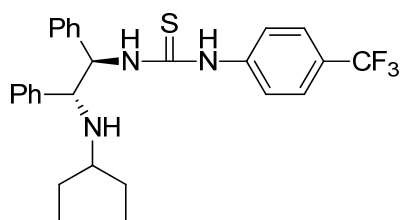

**1e**

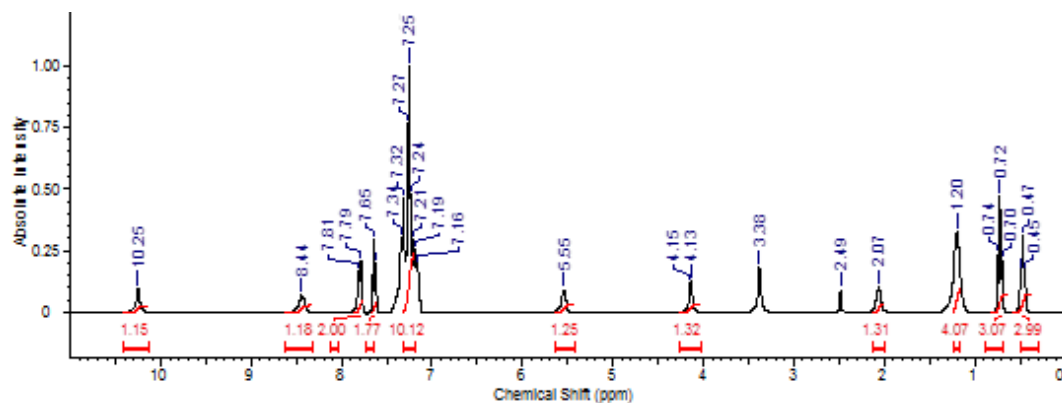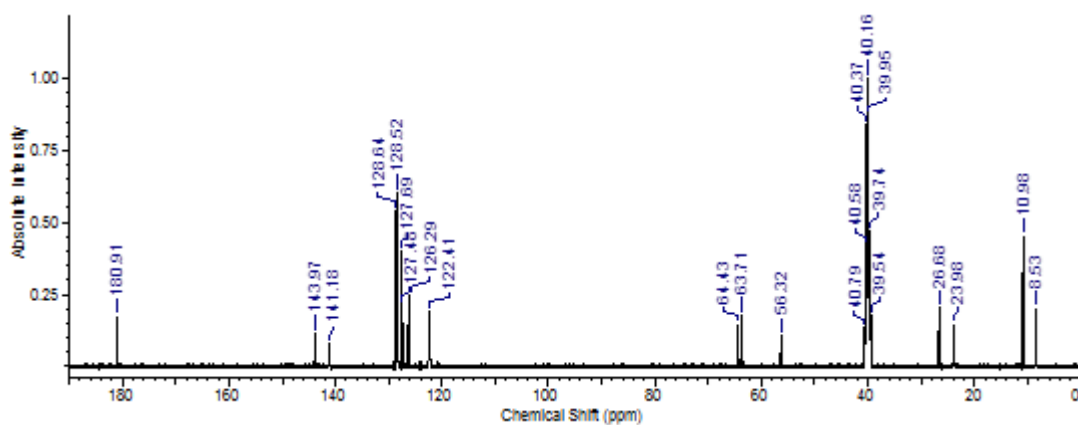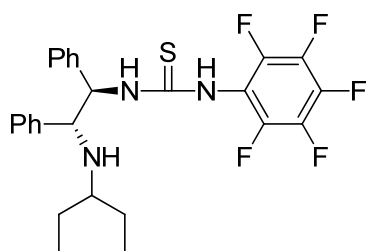

**1f**

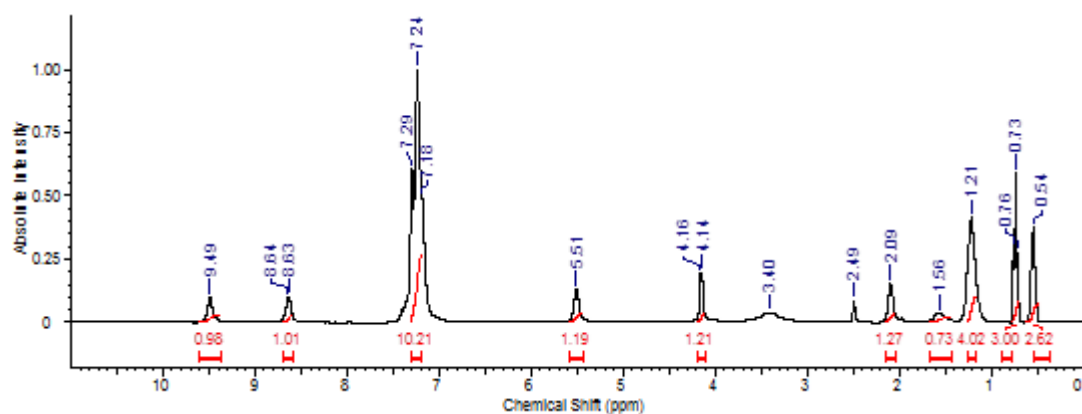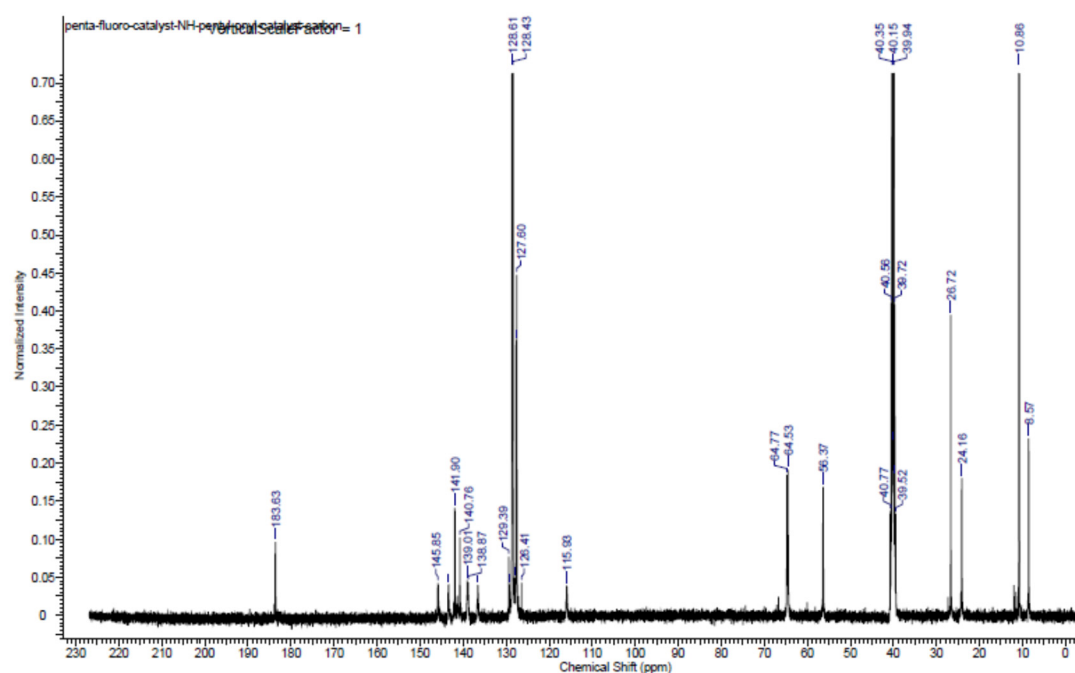

1g

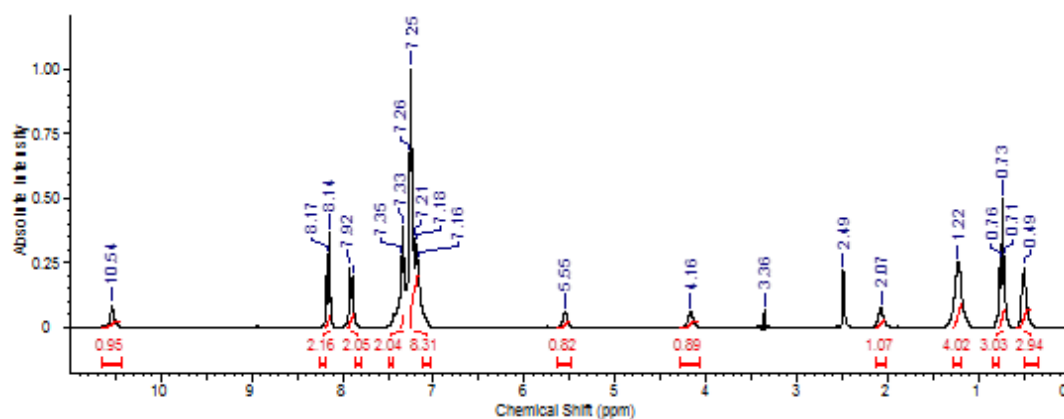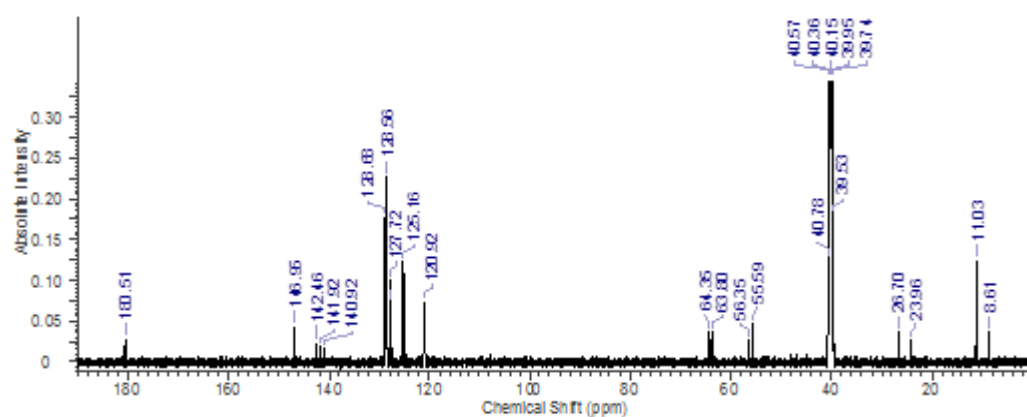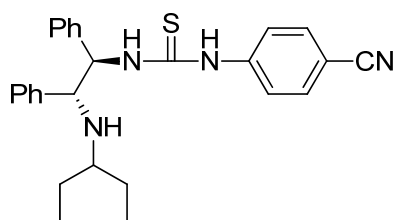

**1h**

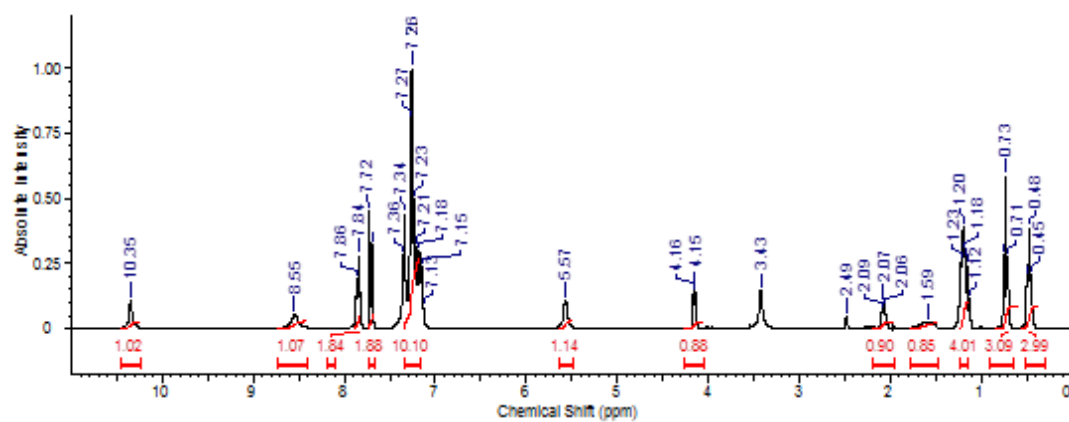

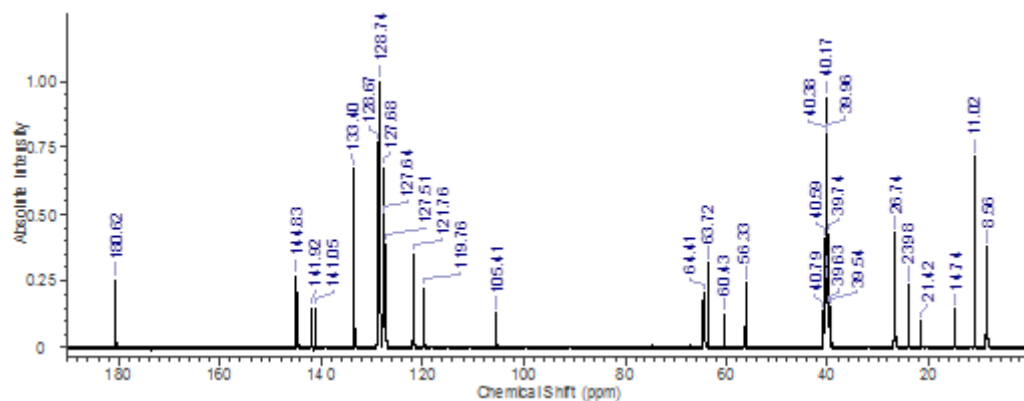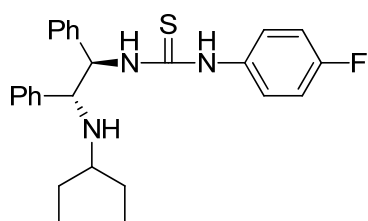

1i

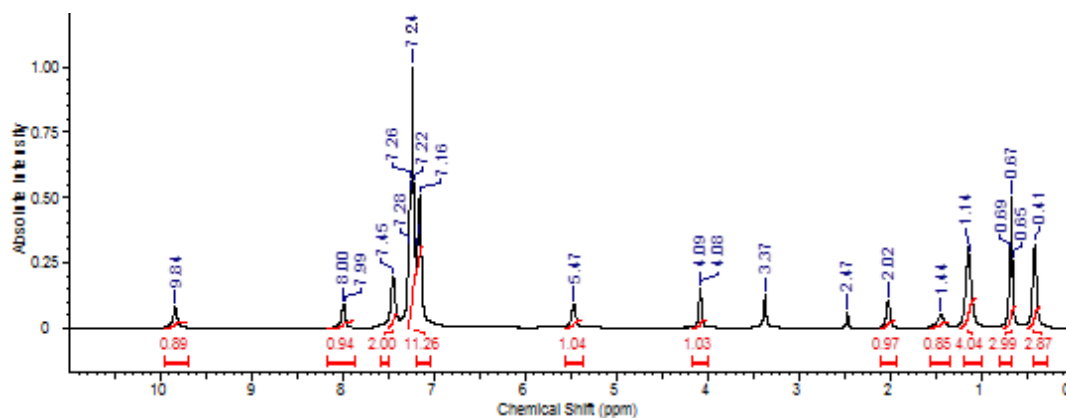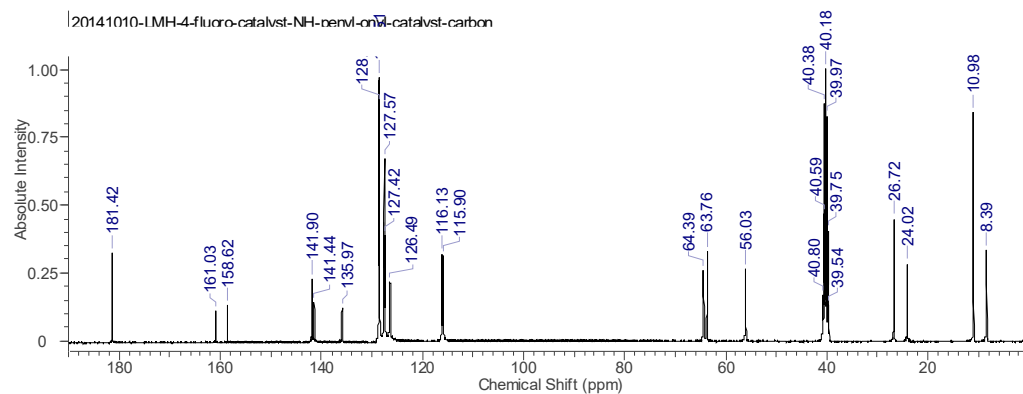

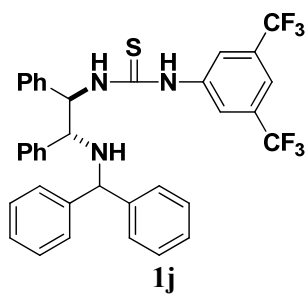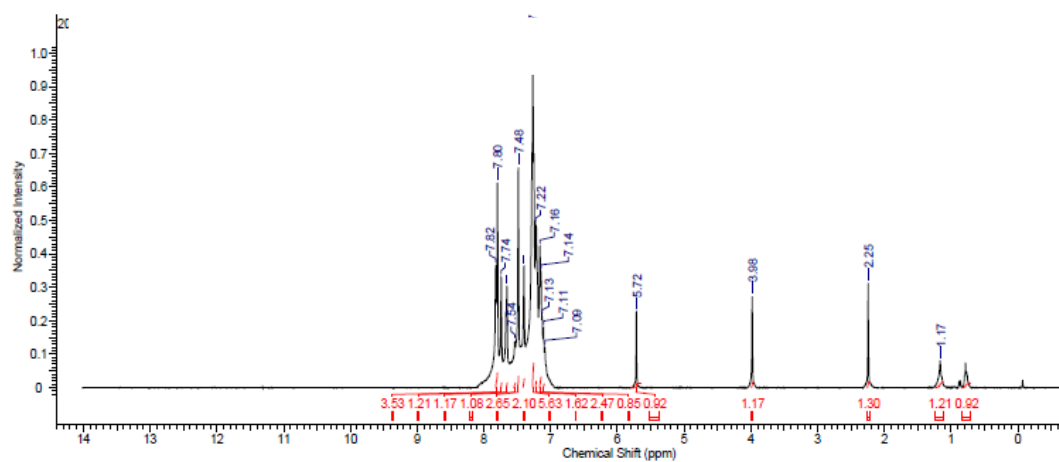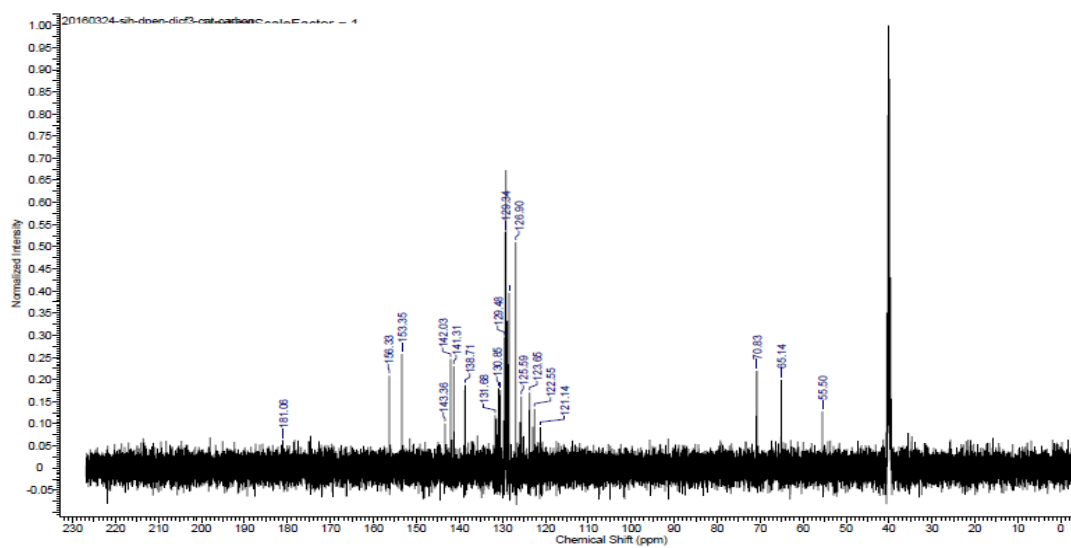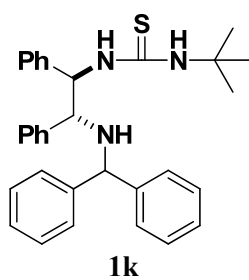

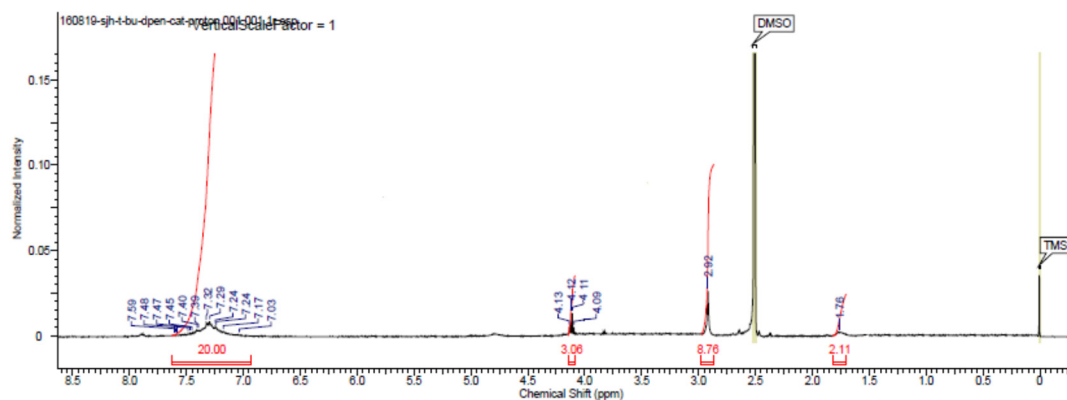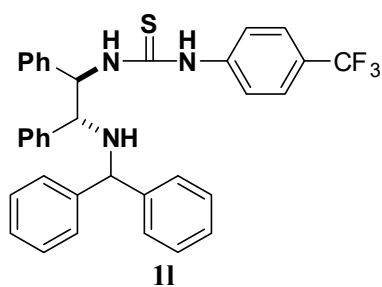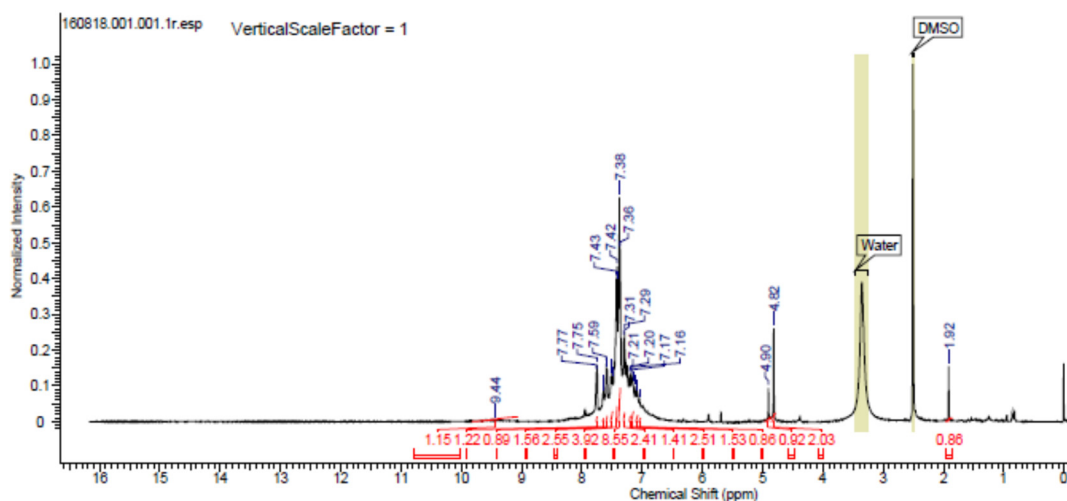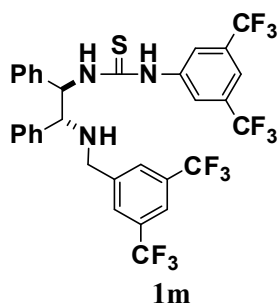

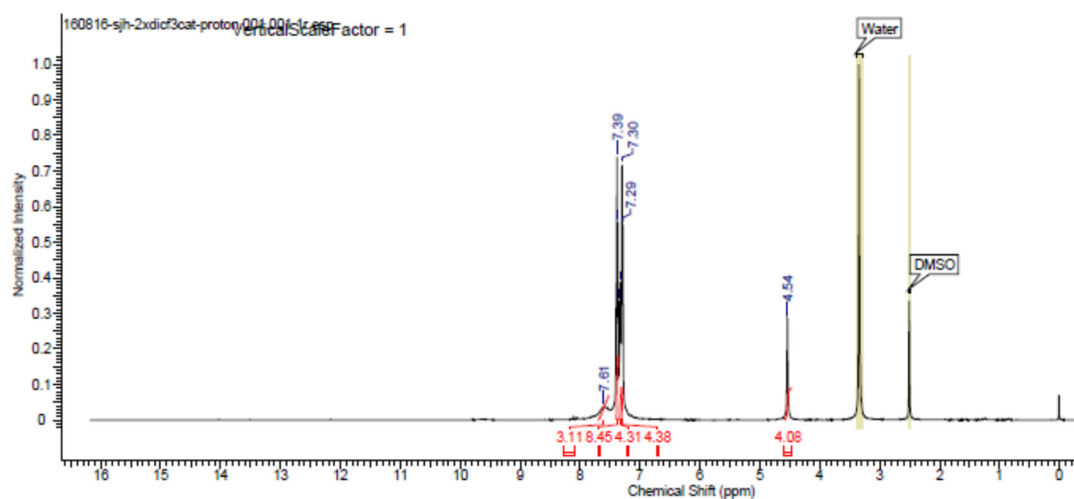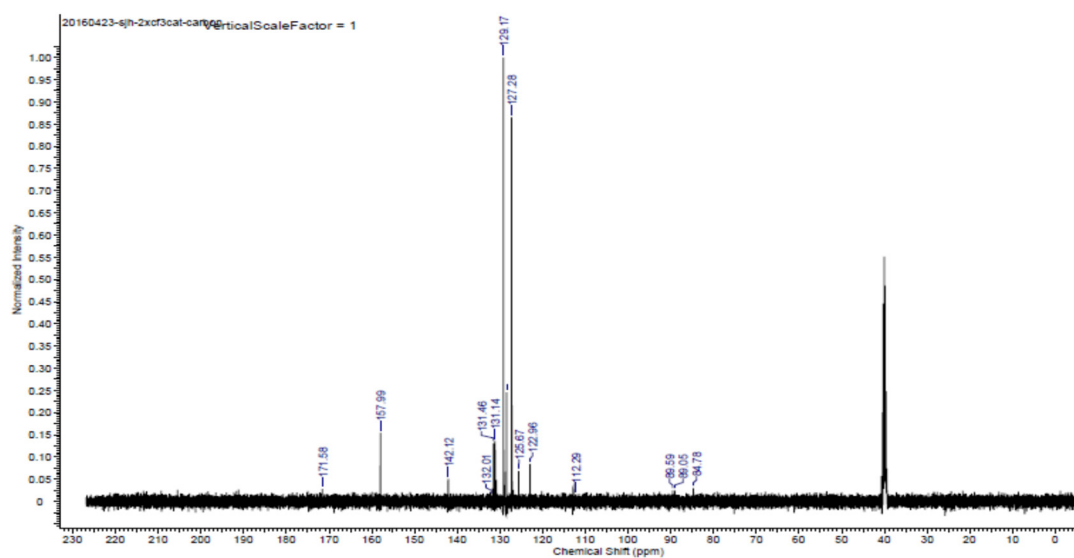

$^{13}\text{C}$  NMR-DMSO- $d_6$

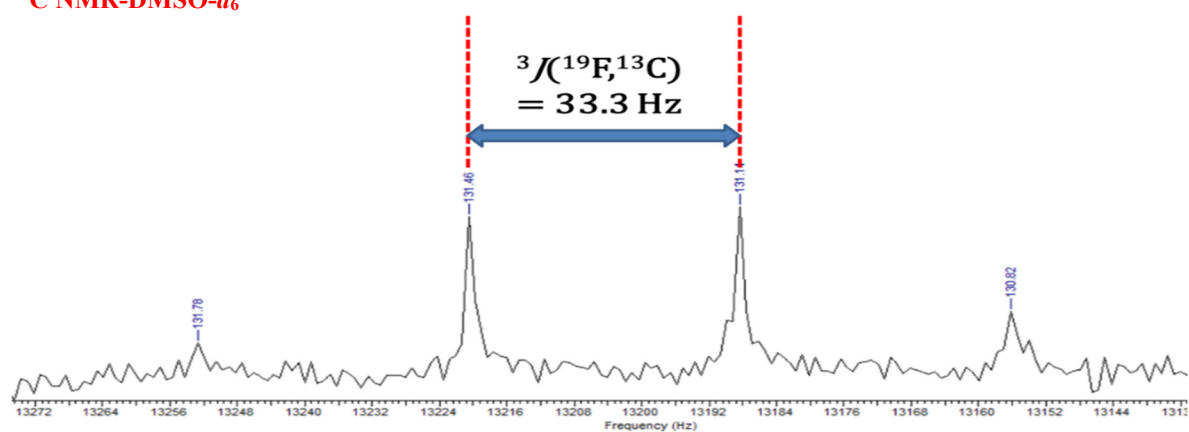

$^{19}\text{F}$  NMR-MeOH+ $\text{D}_2\text{O}$



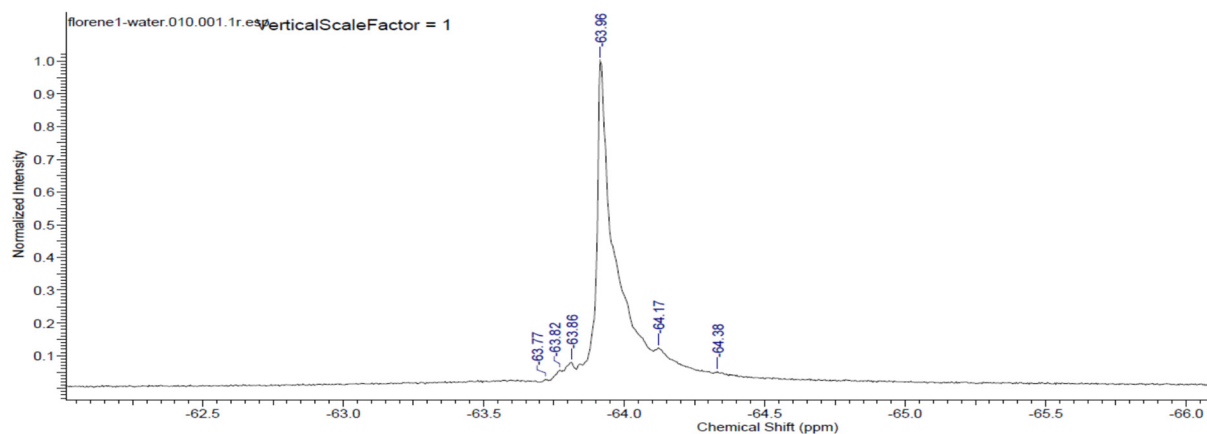

### <sup>19</sup>F NMR-MeOH-*d*<sub>4</sub>

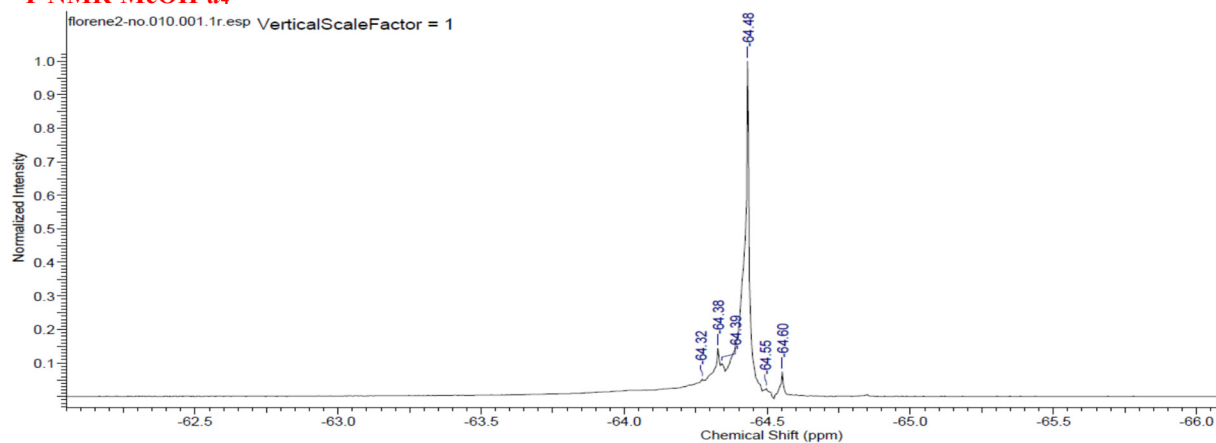

### 1n

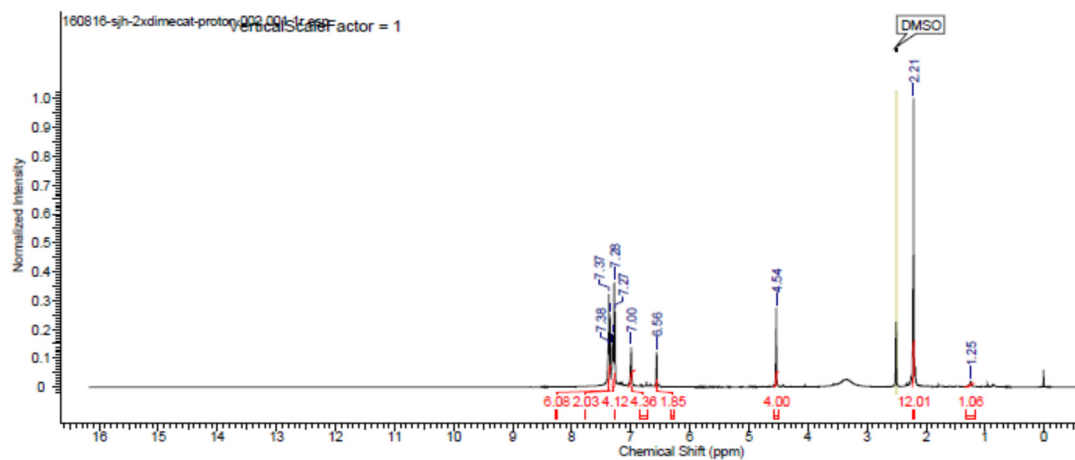

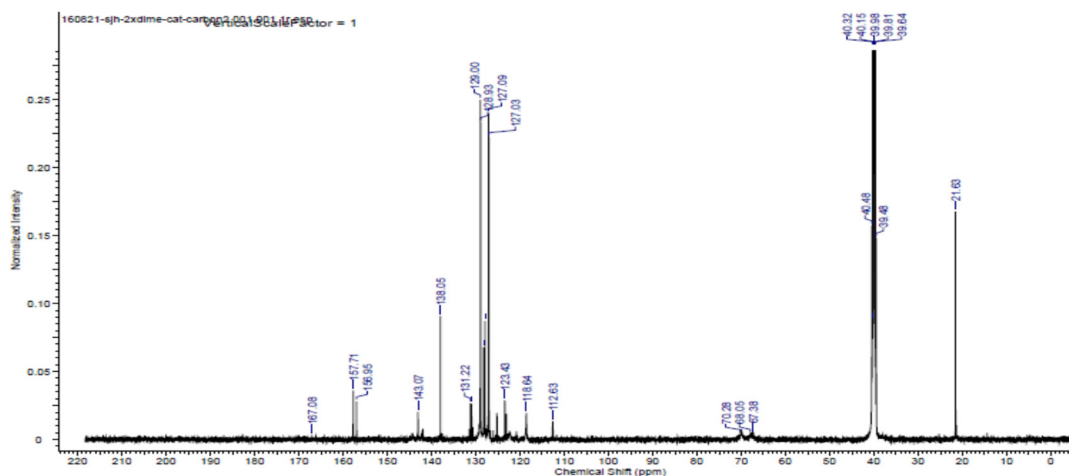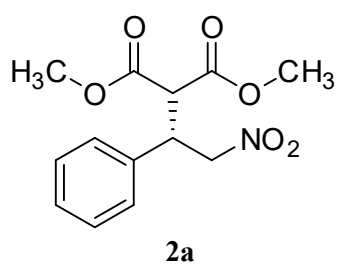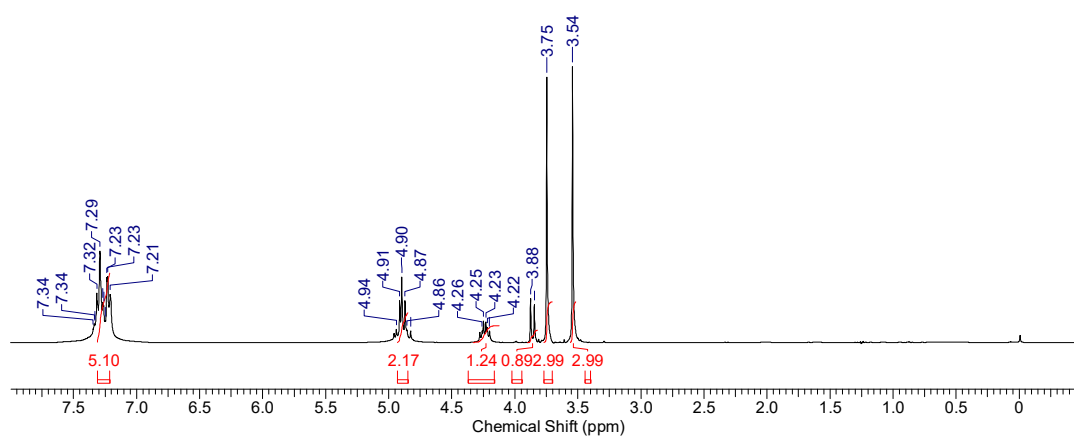

20140004 1 MU DIMETHYL MALONATE X 6 PRODUCT CARBON-13

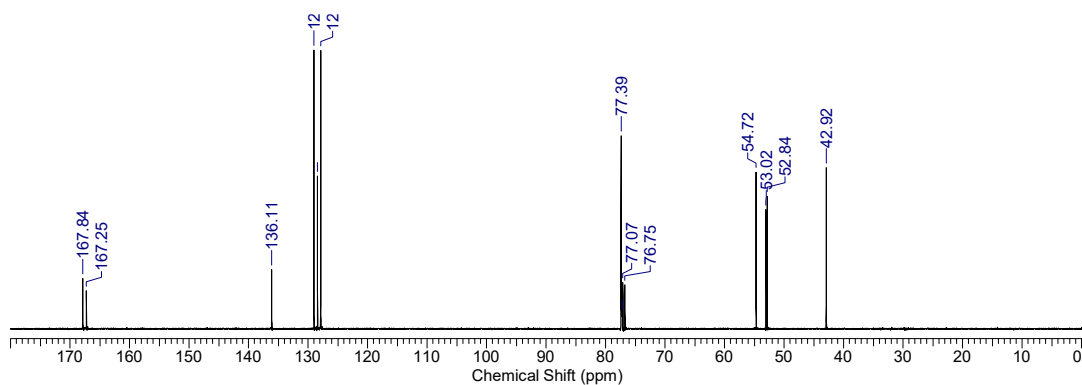

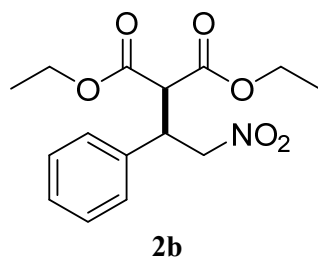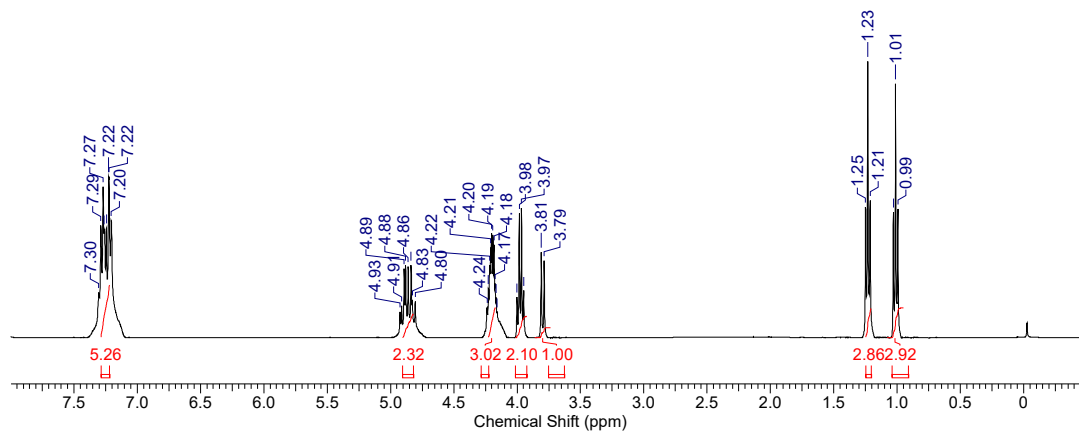

20414047 13C NMR DIETYL NITROSTYRENE CARBON-13

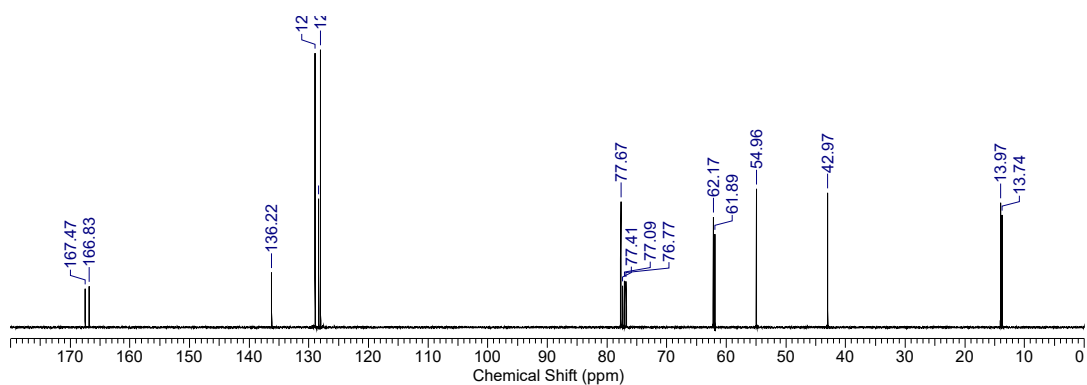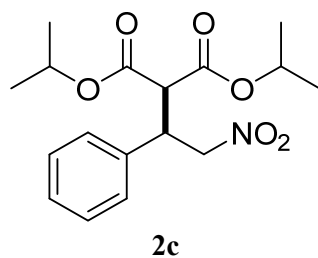

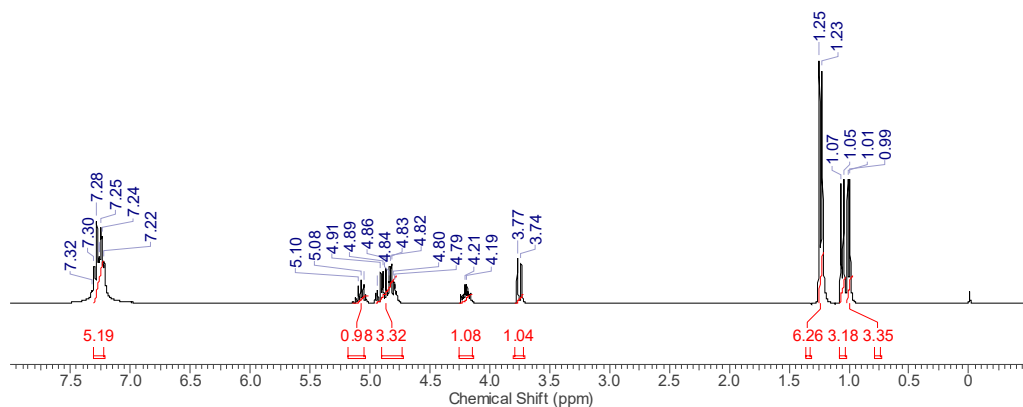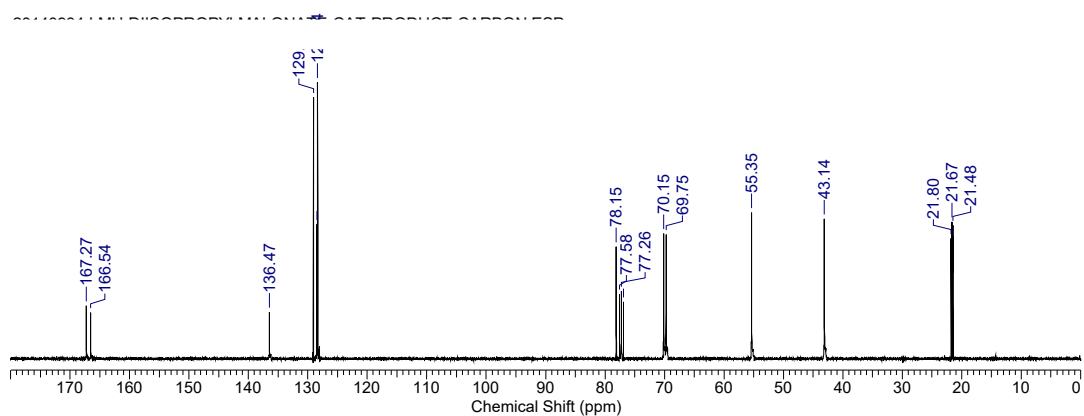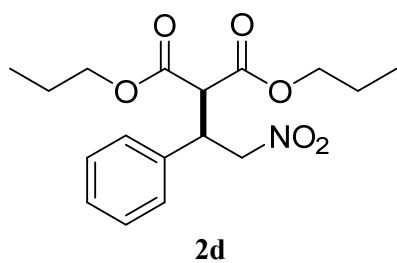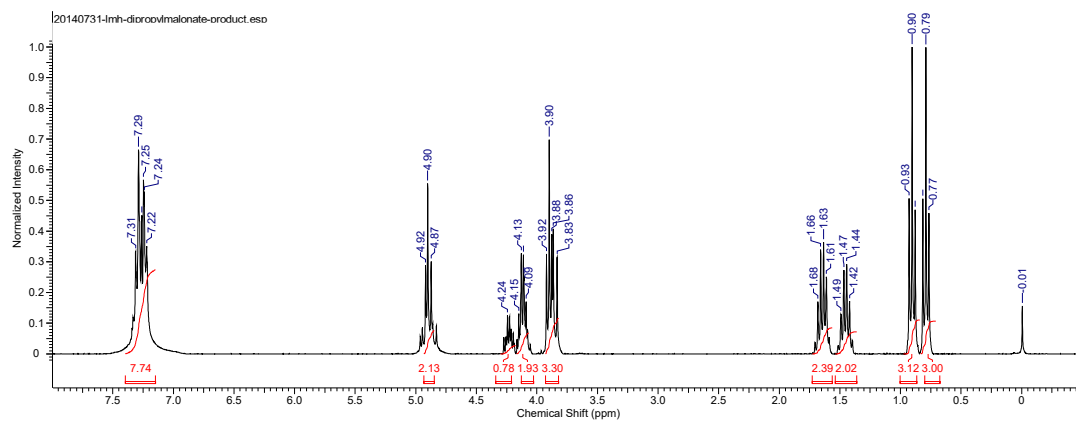

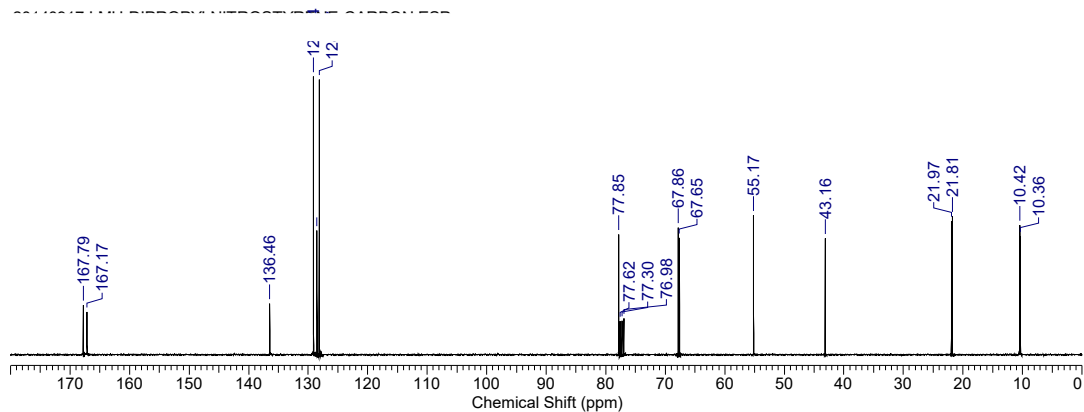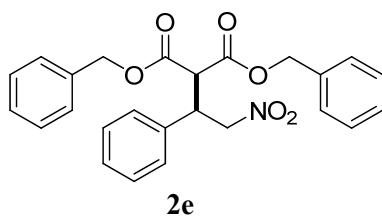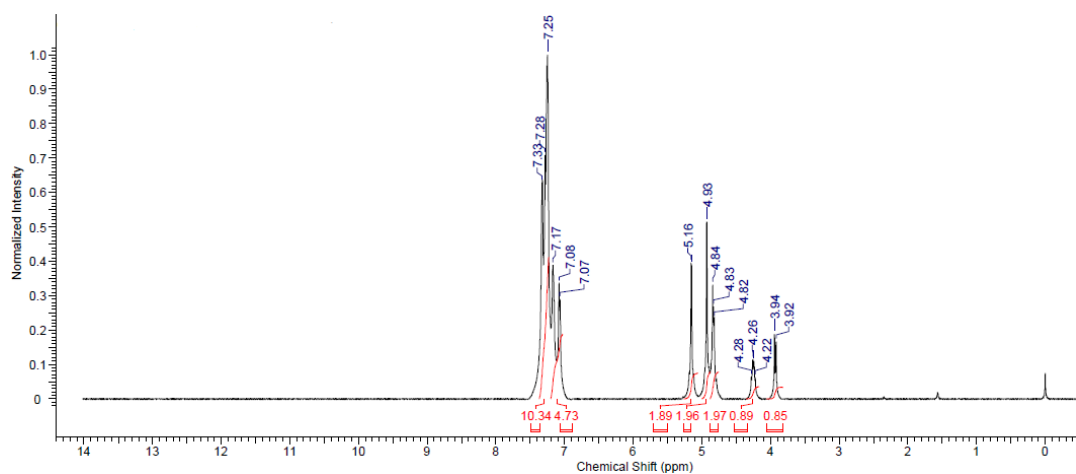

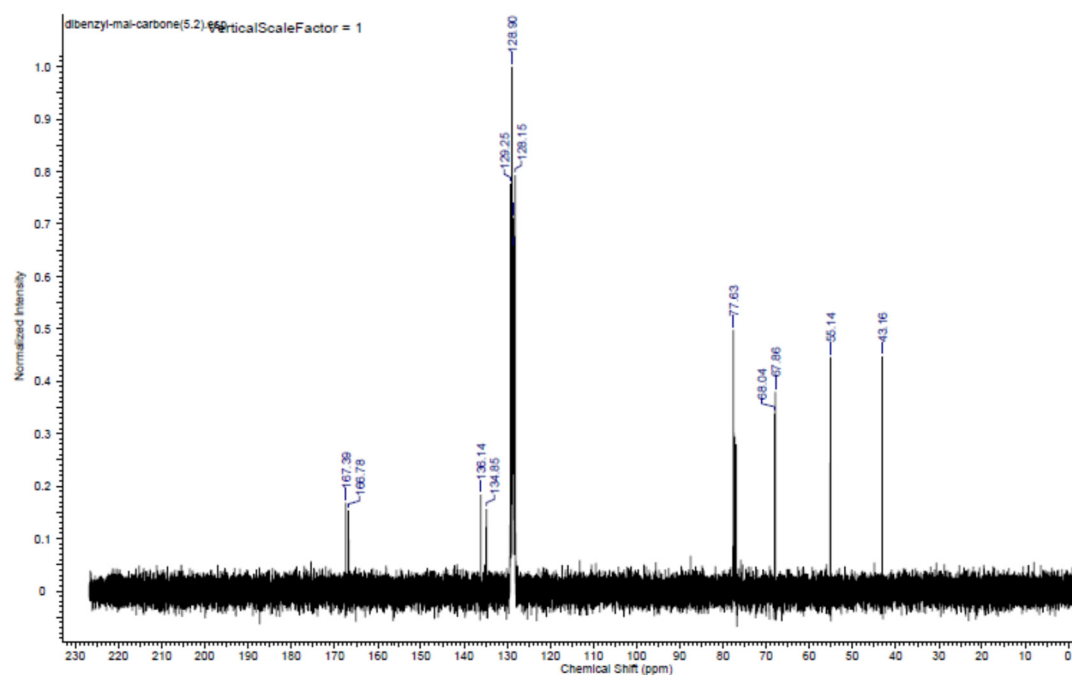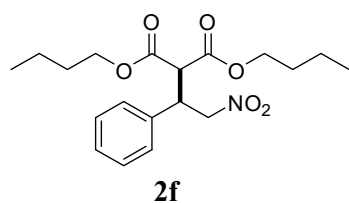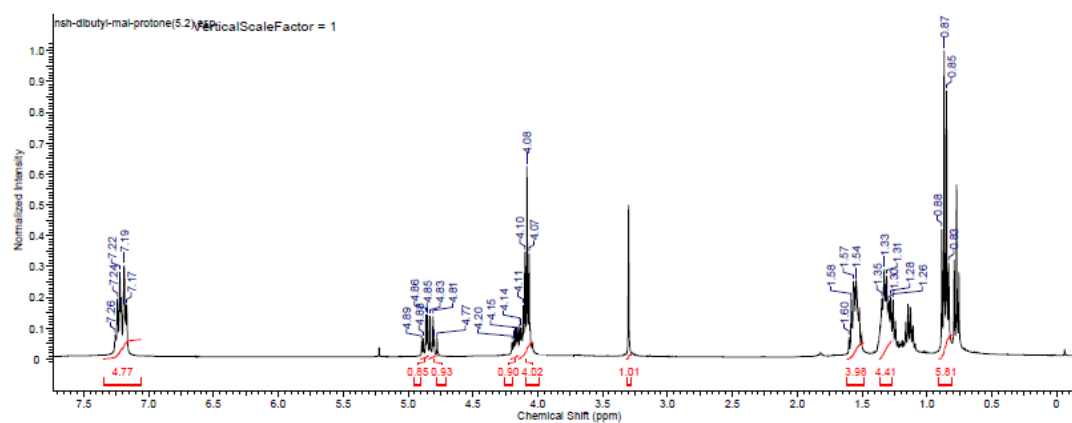

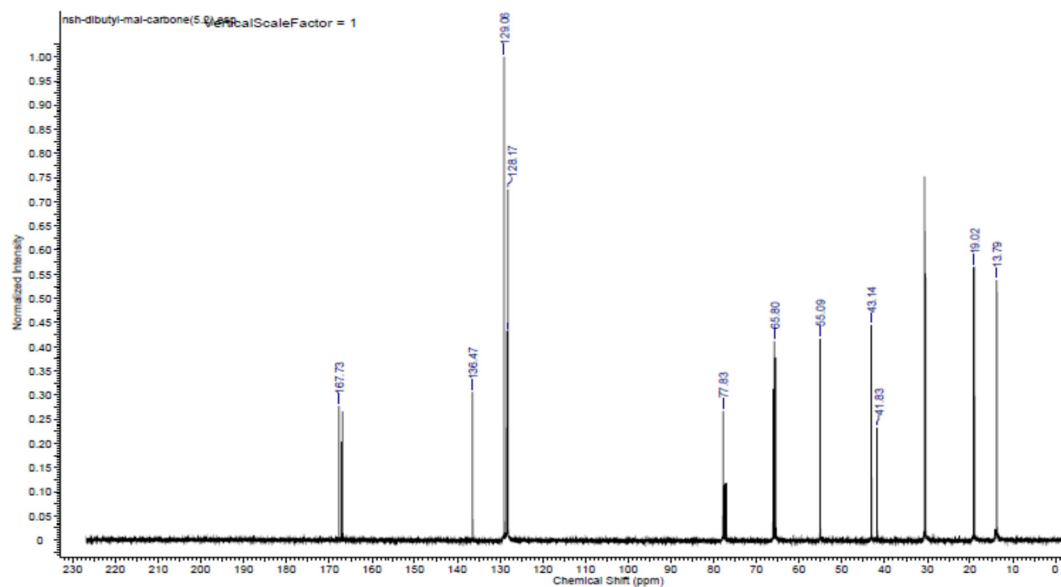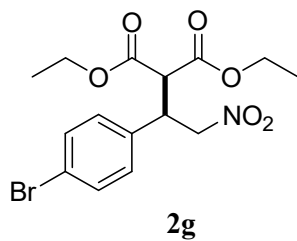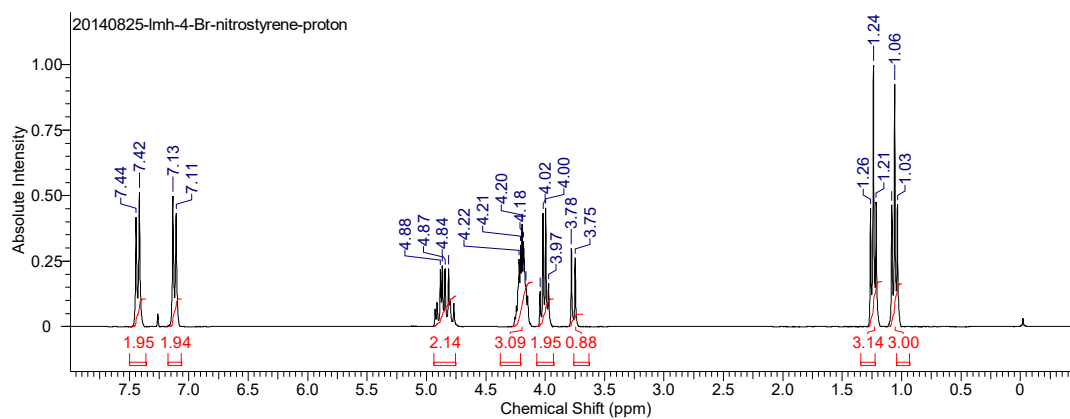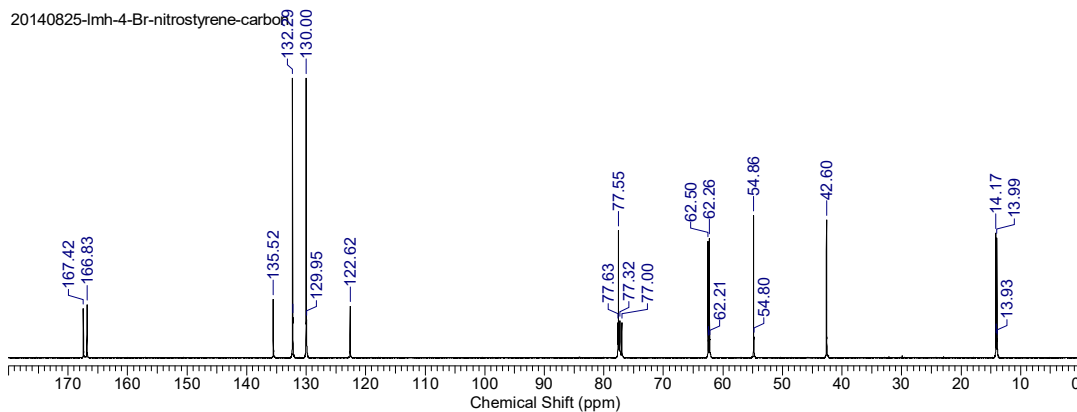

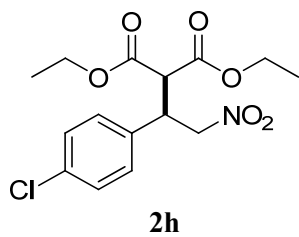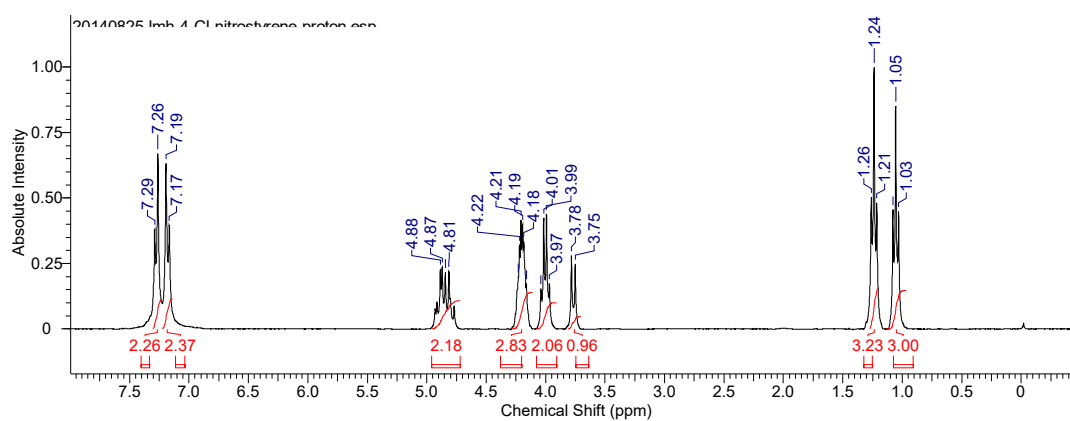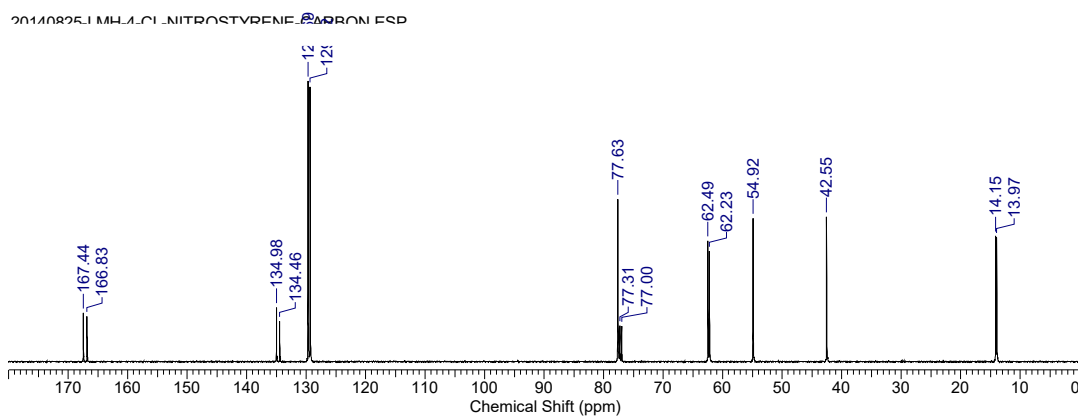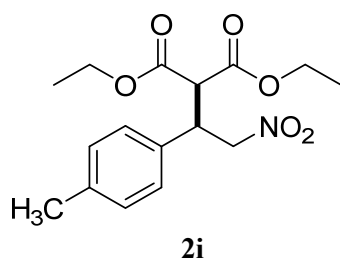



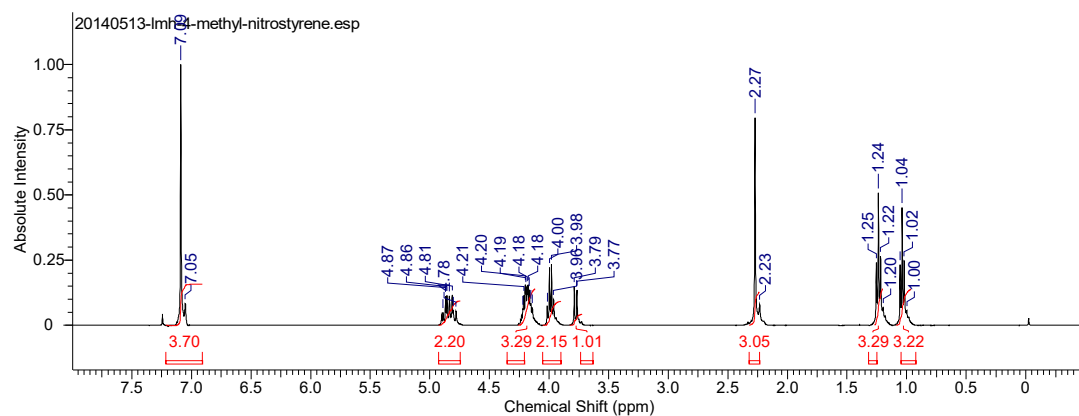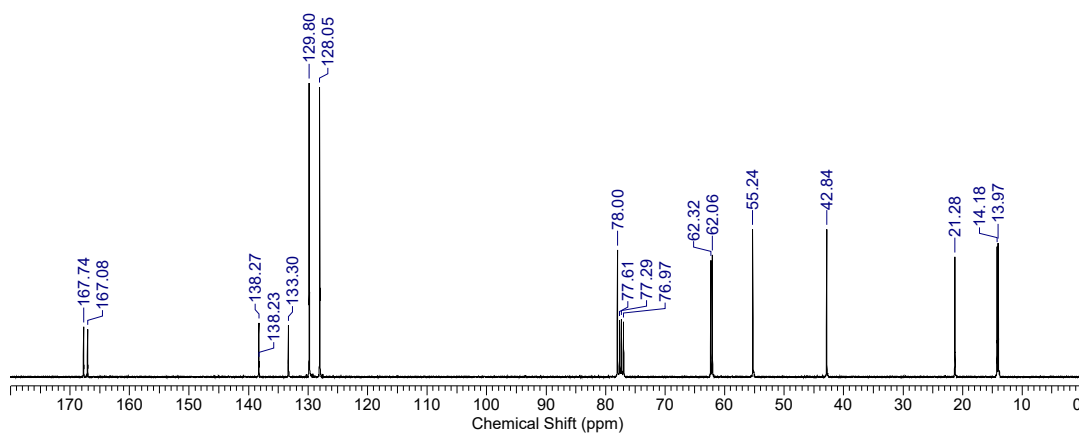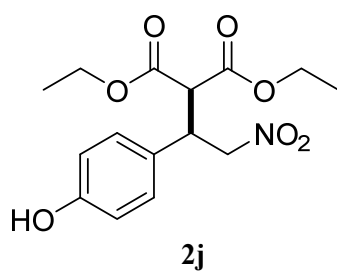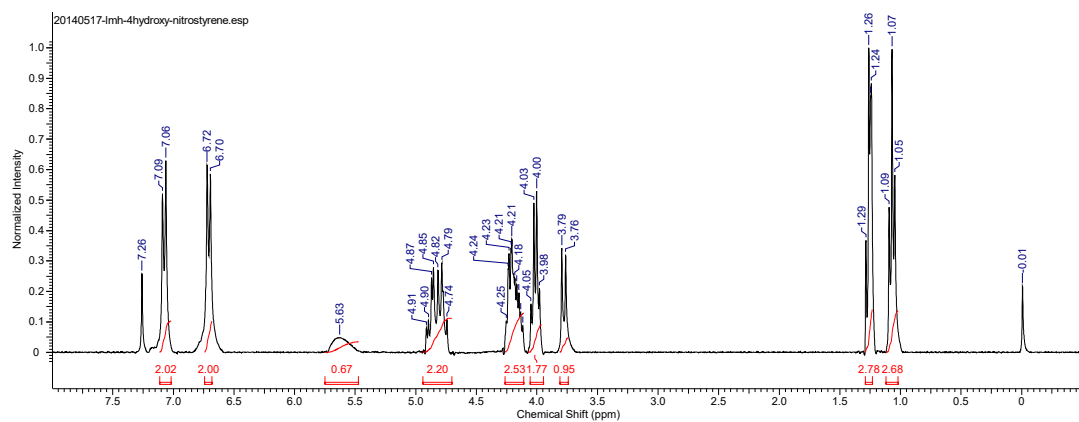

2010828-LMH-4-OH-NITROSTYRENE-CAT-CARBON.ESP

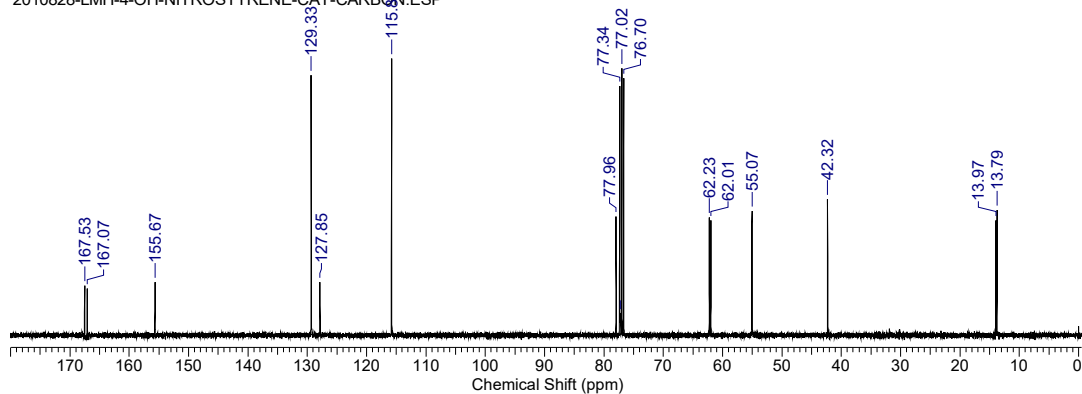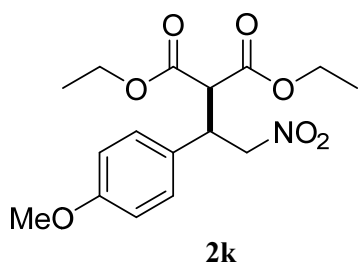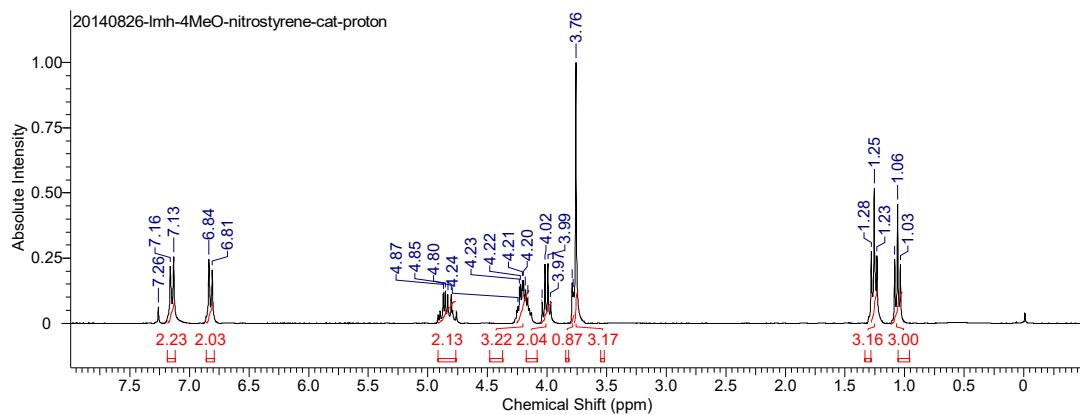

20140825-lmh-4-MeO-nitrostyrene-carbon.ESP

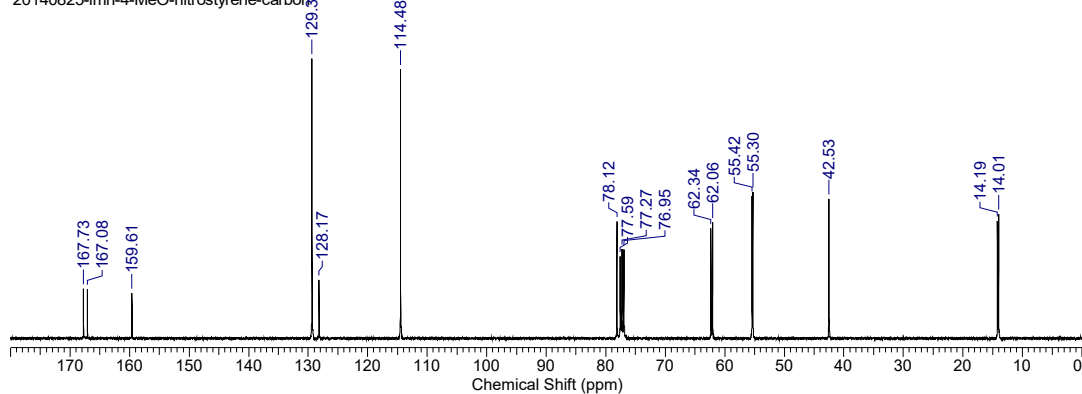

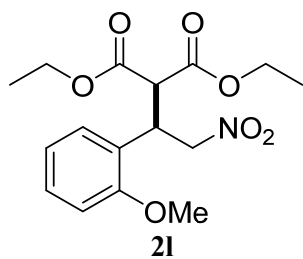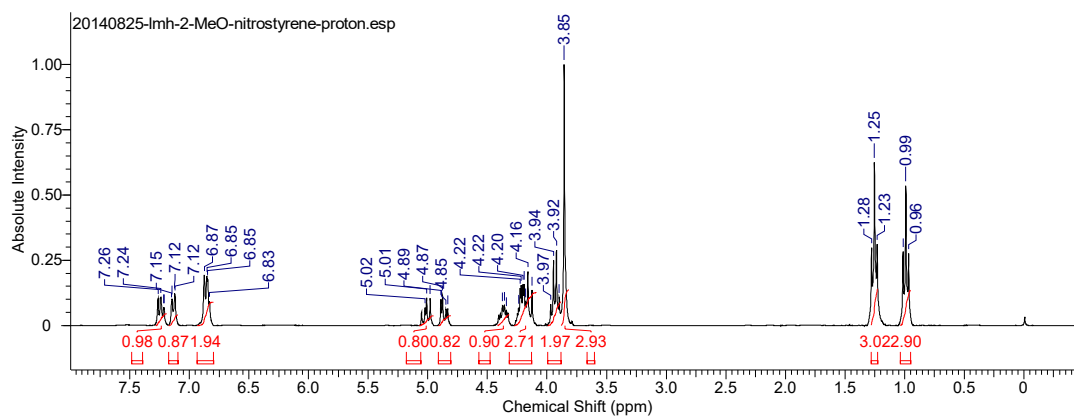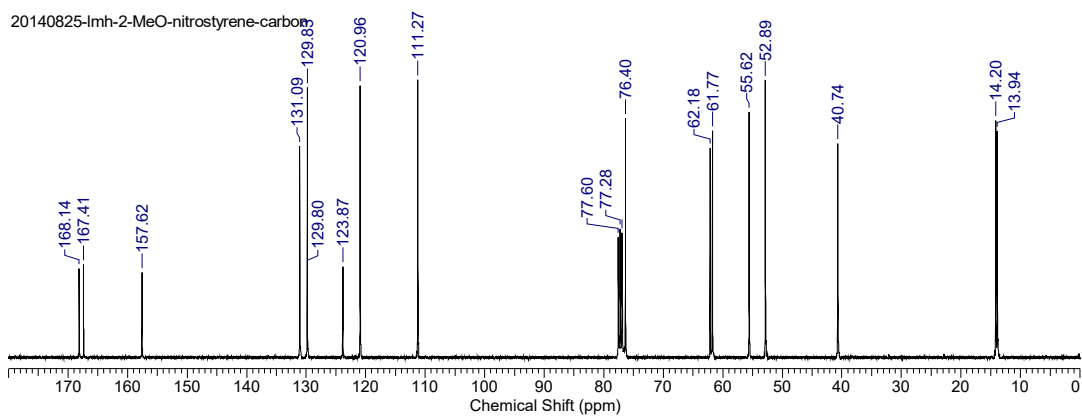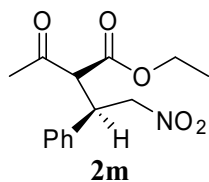

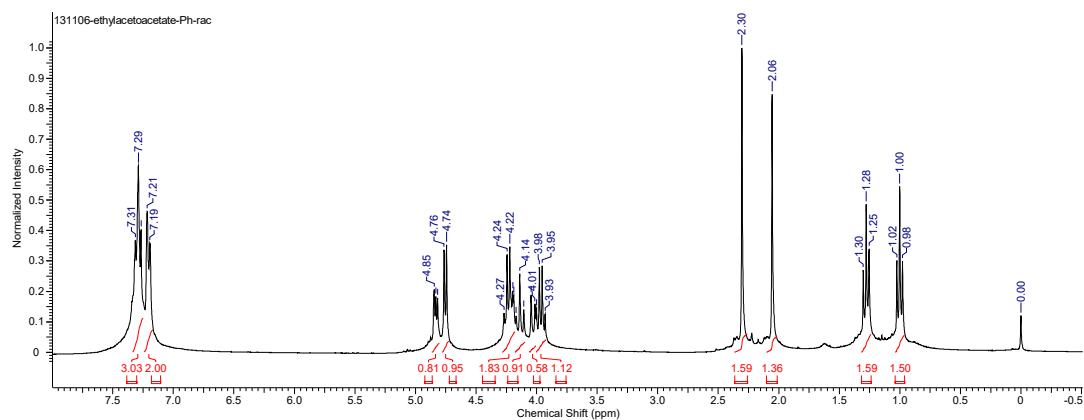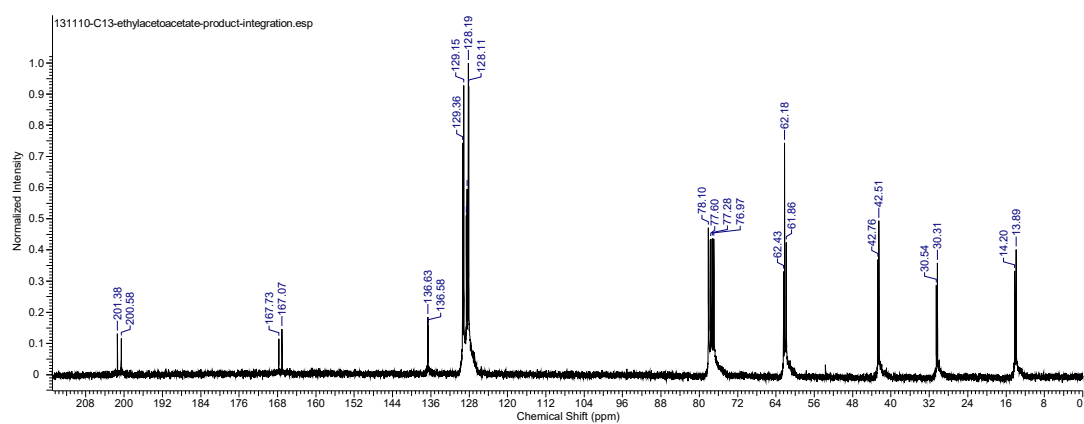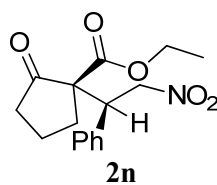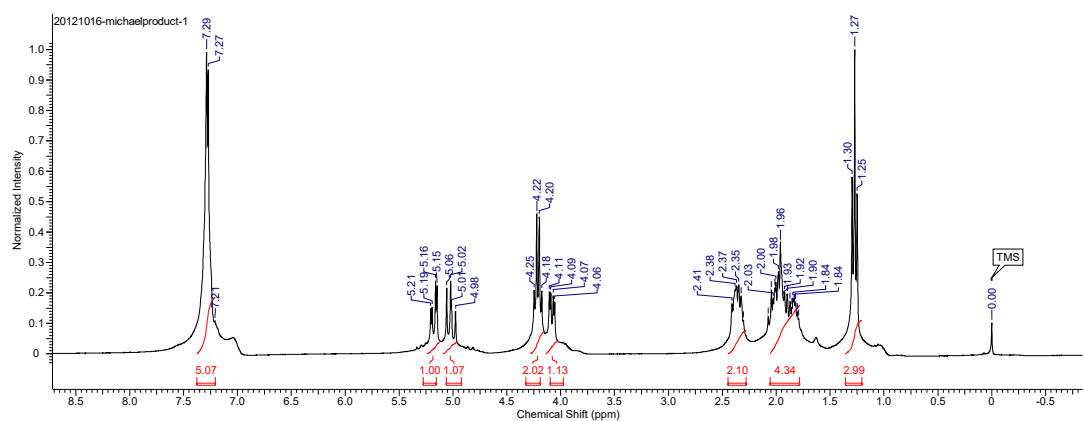

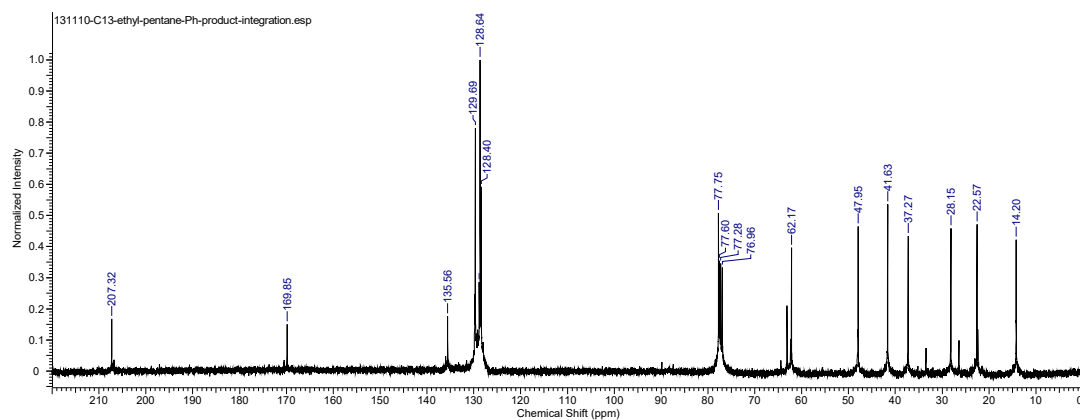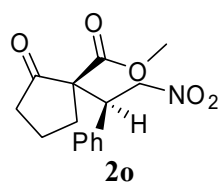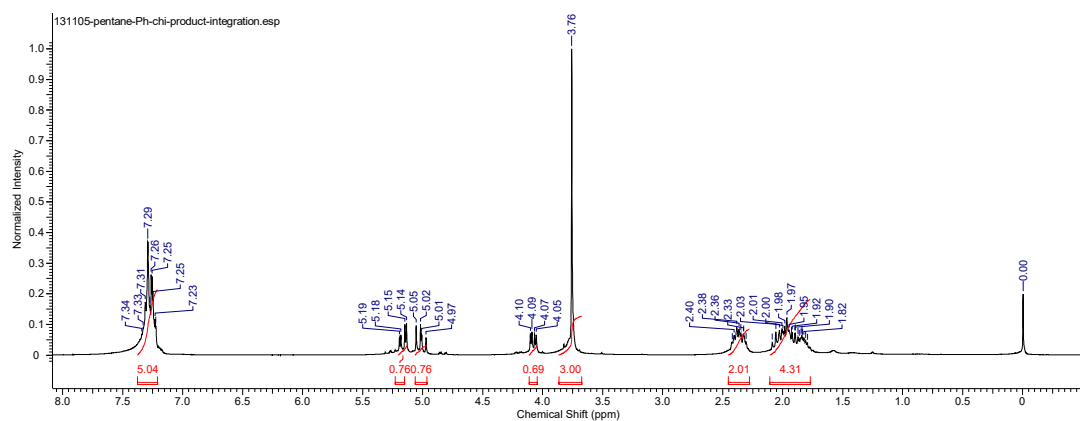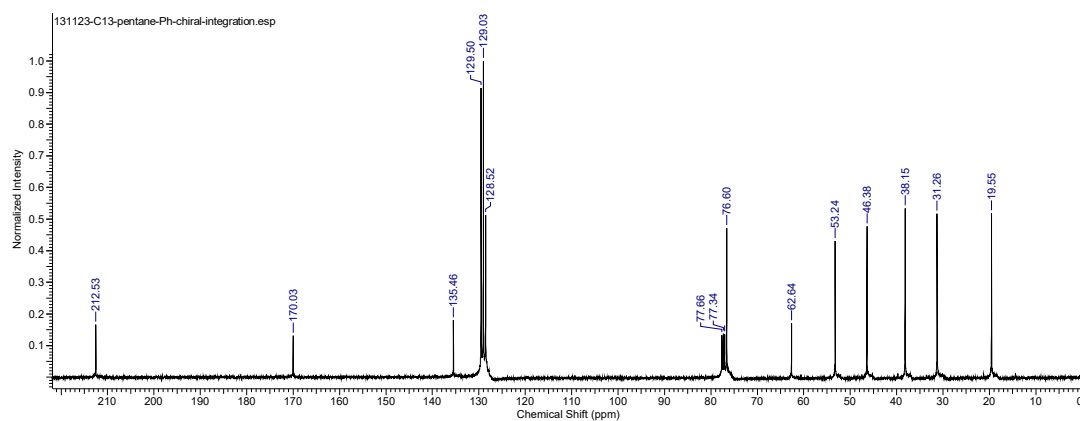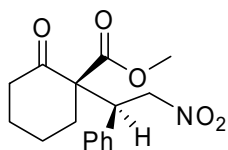

2p

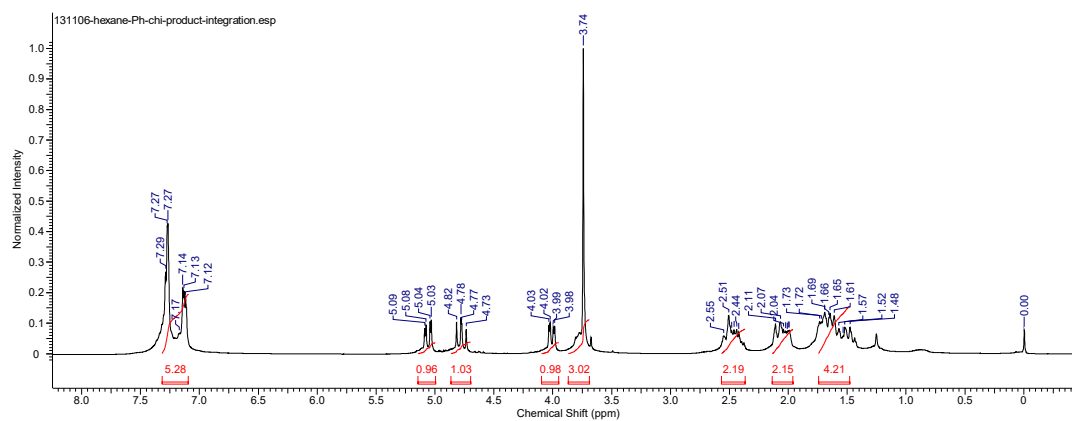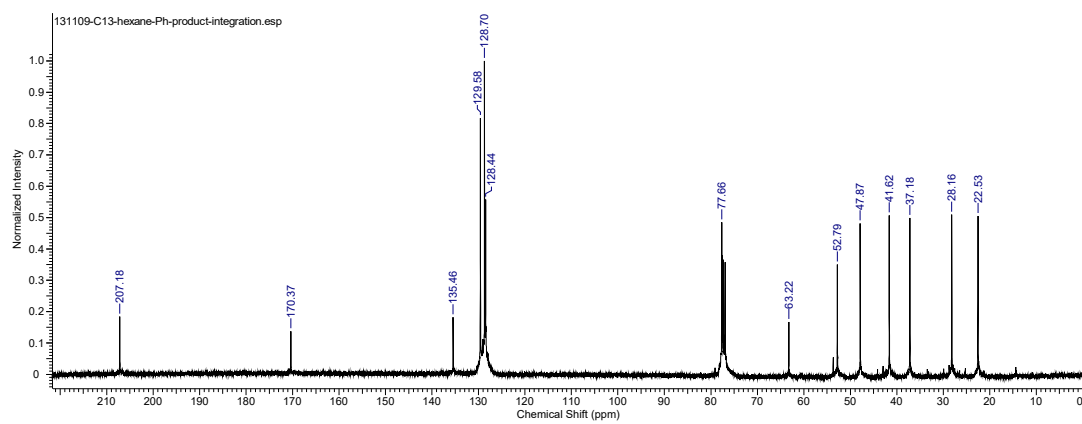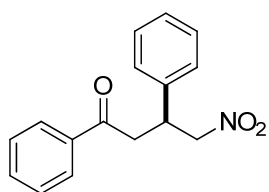

3a

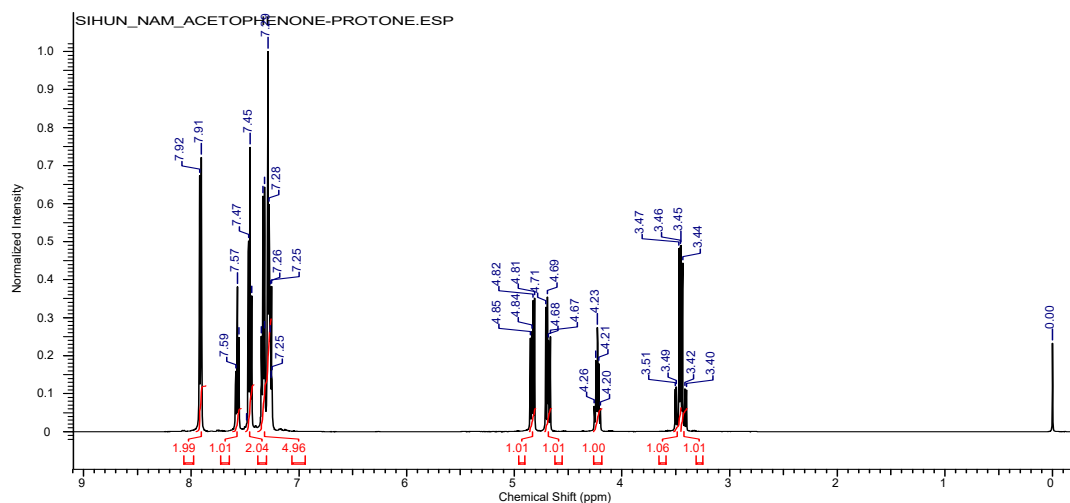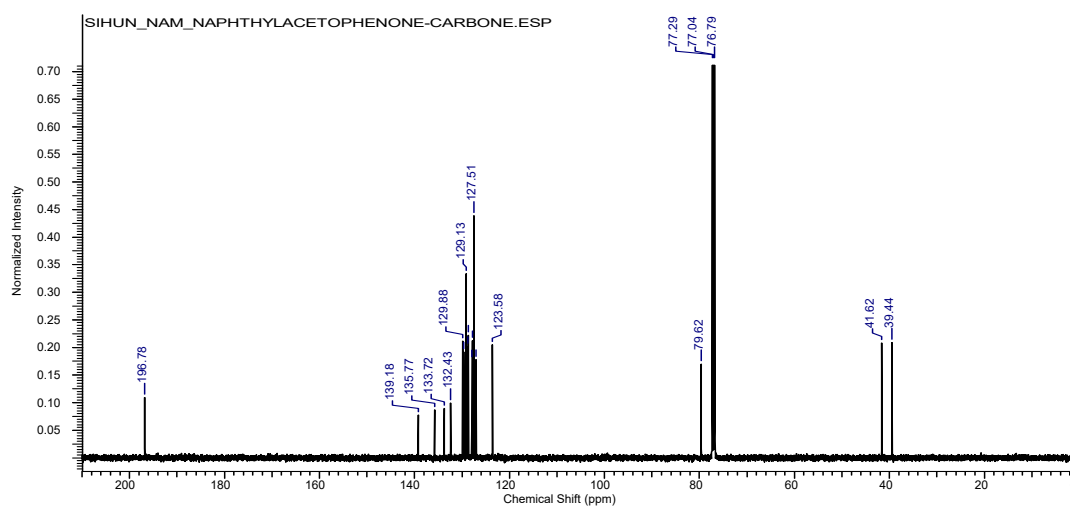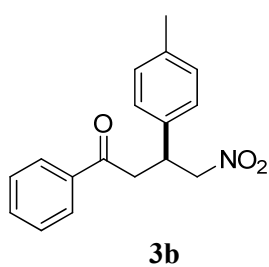

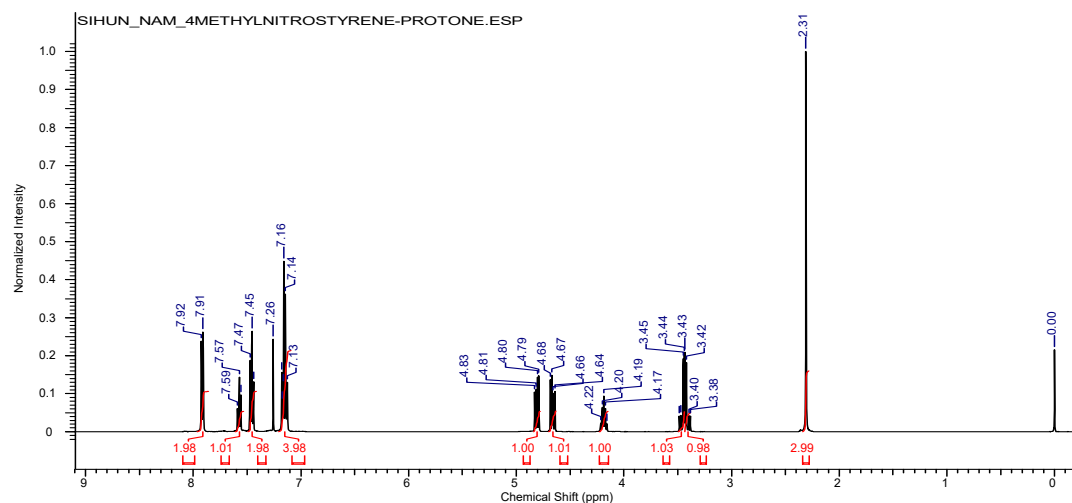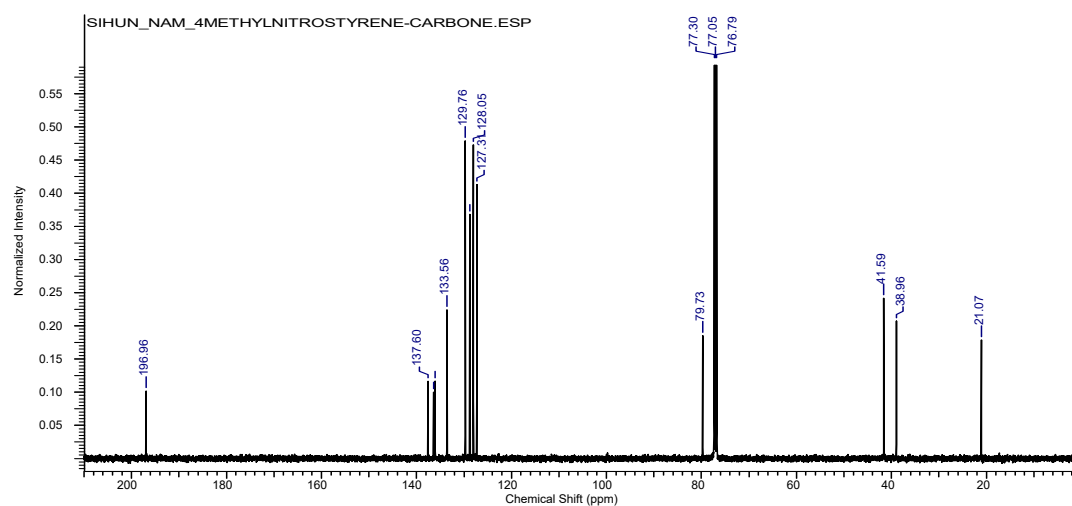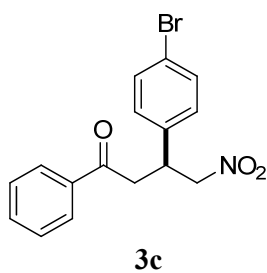



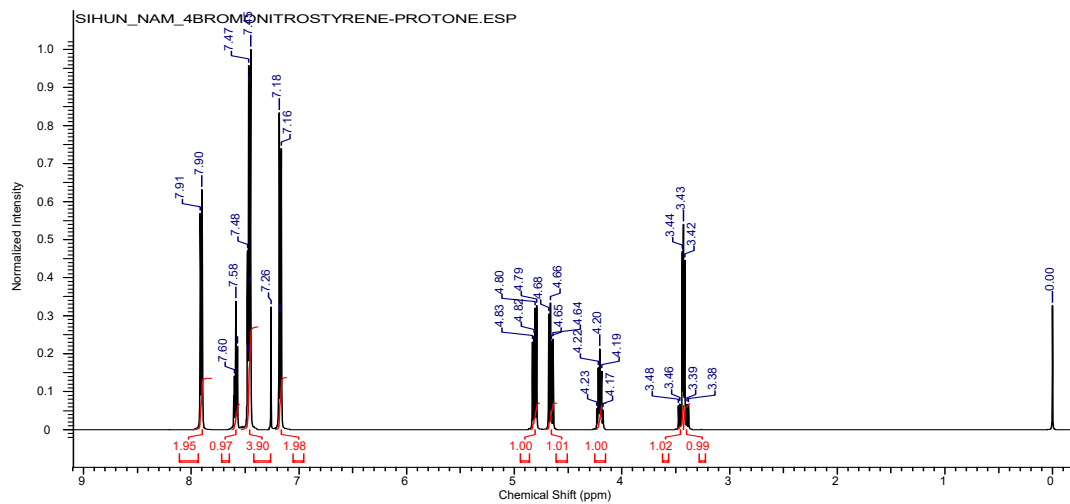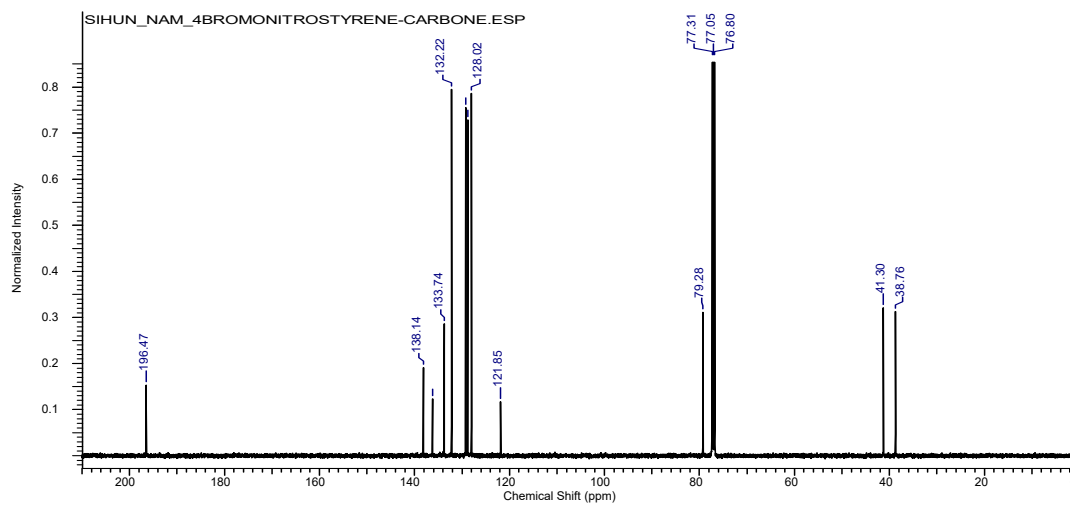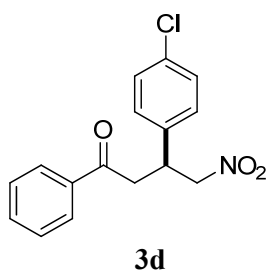

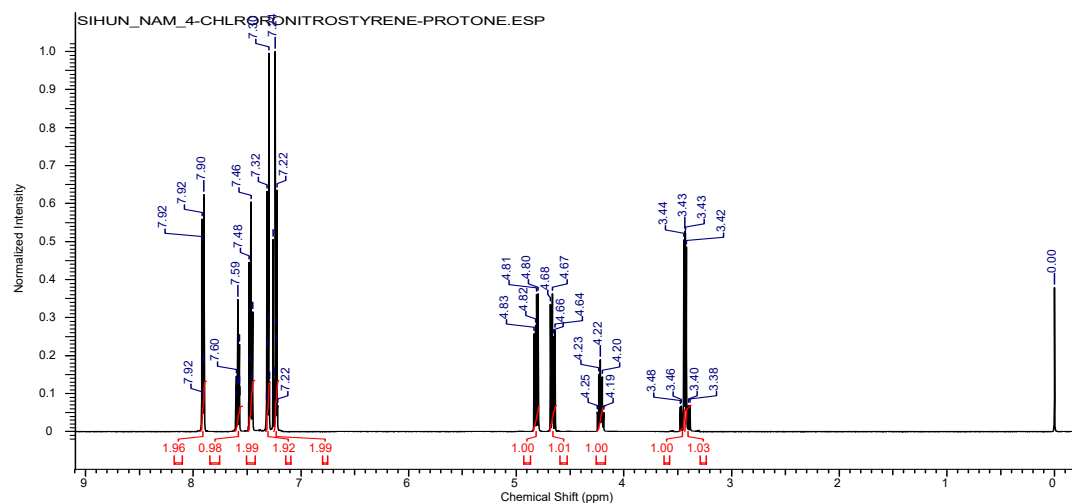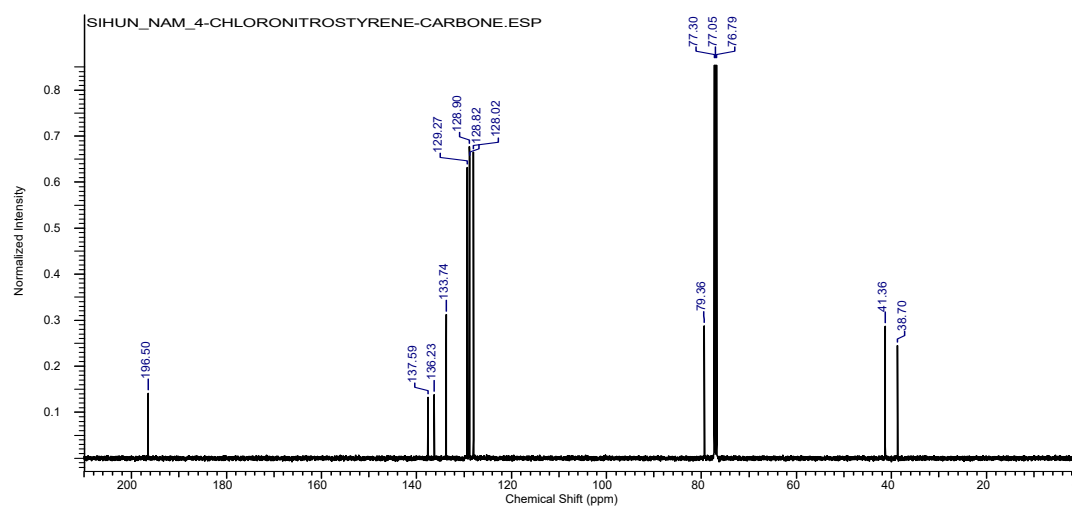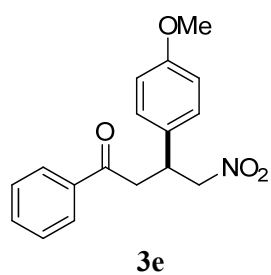

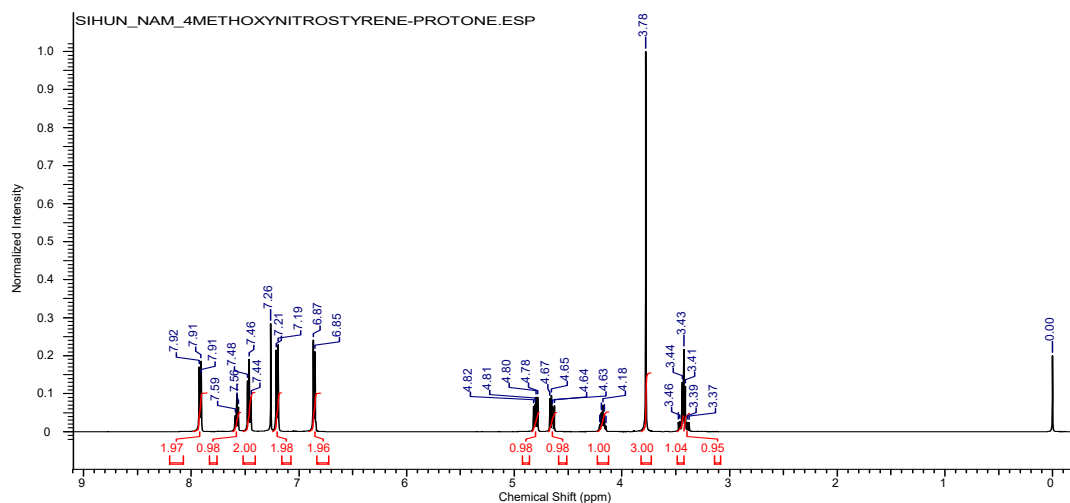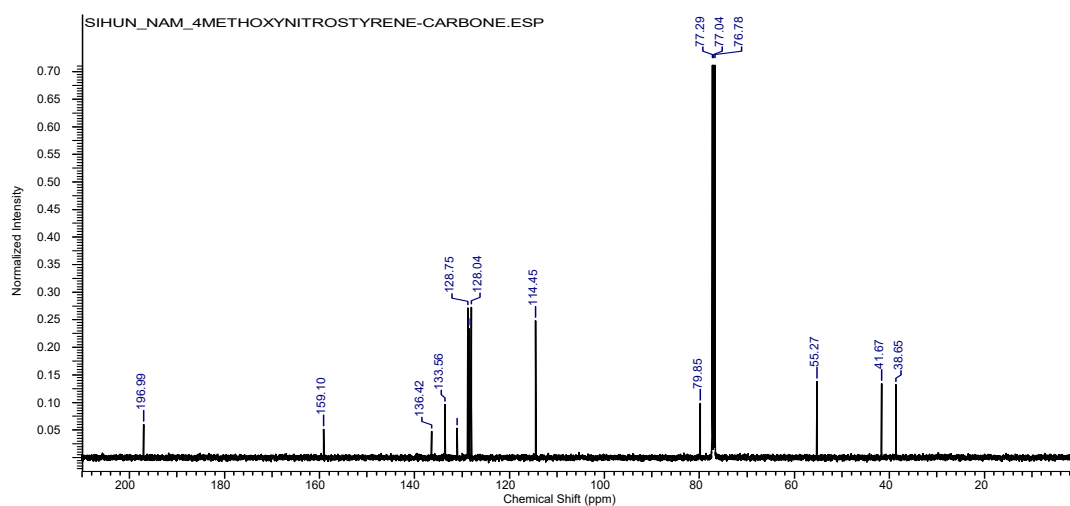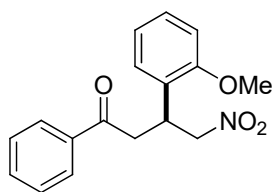

**3f**

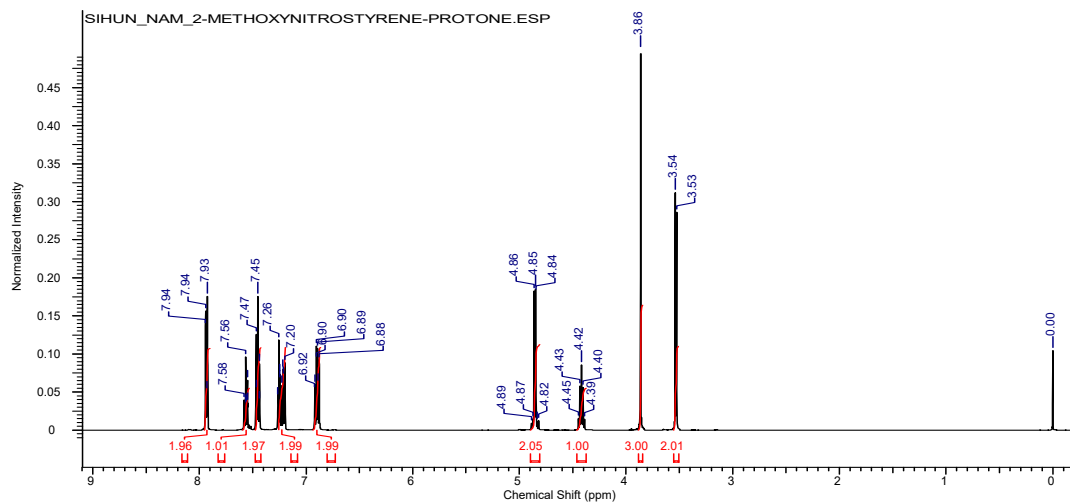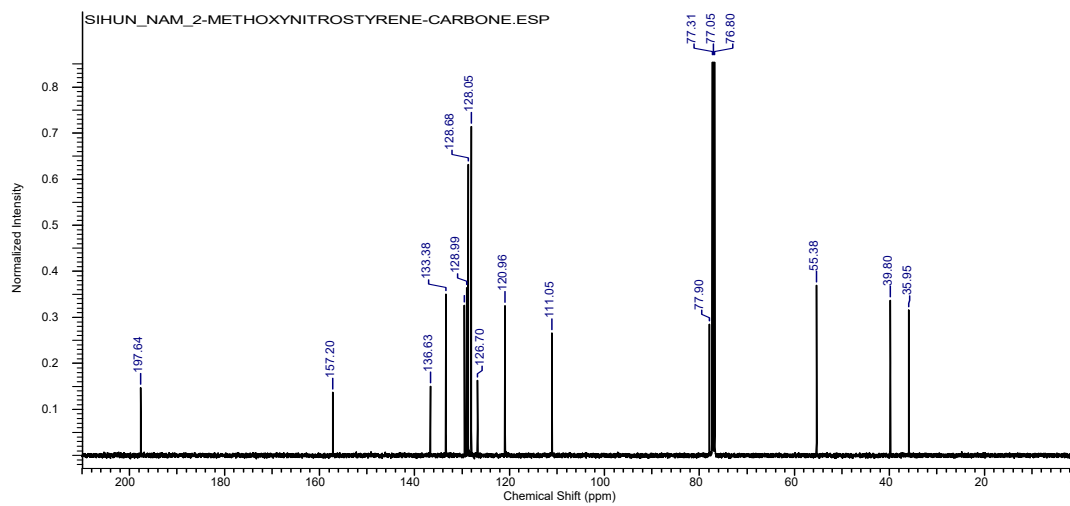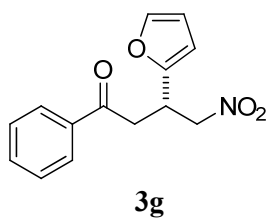

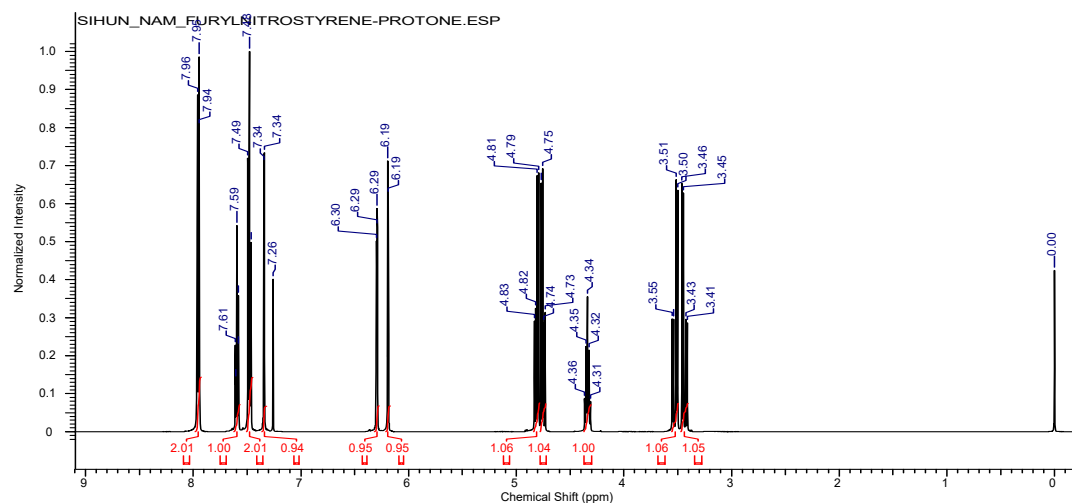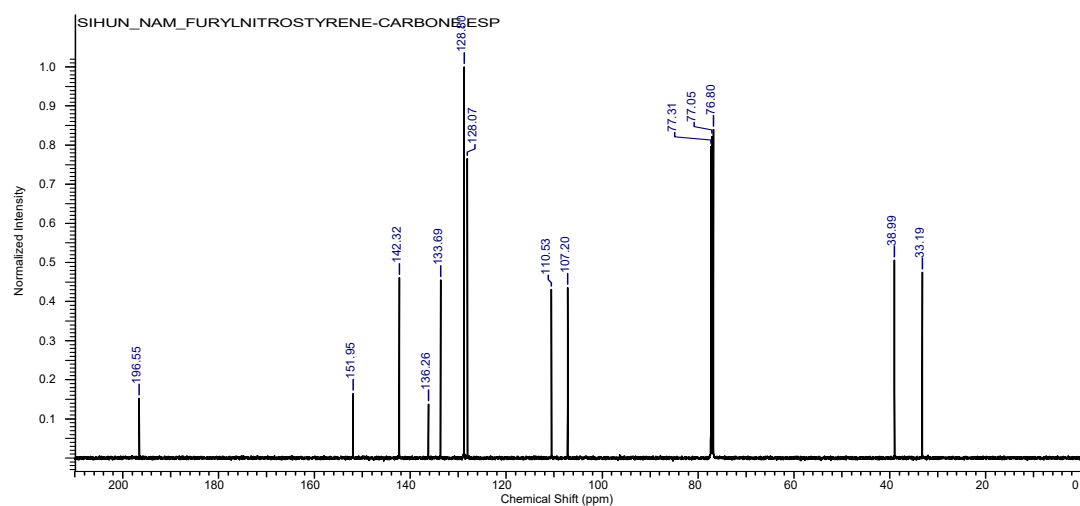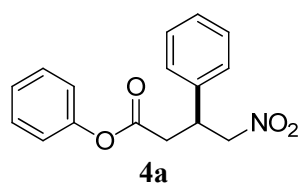

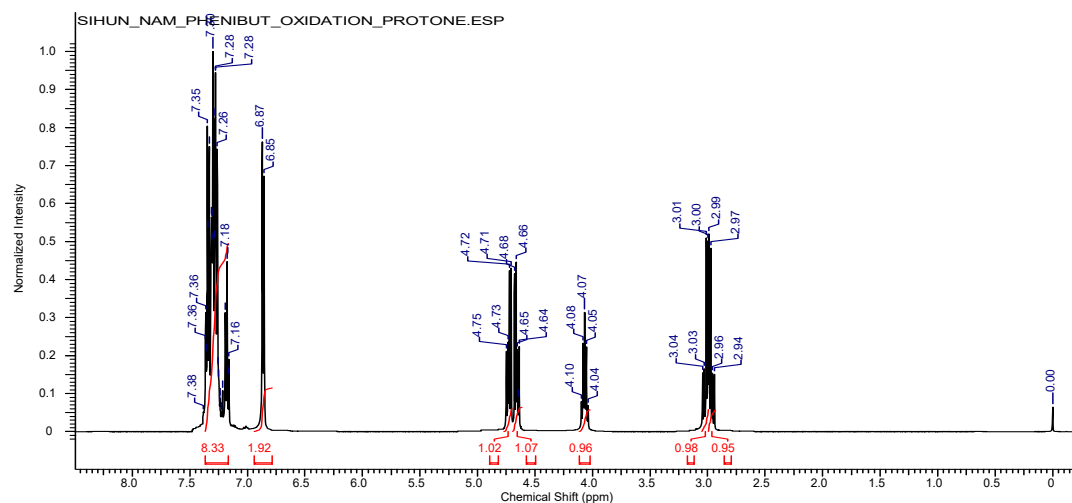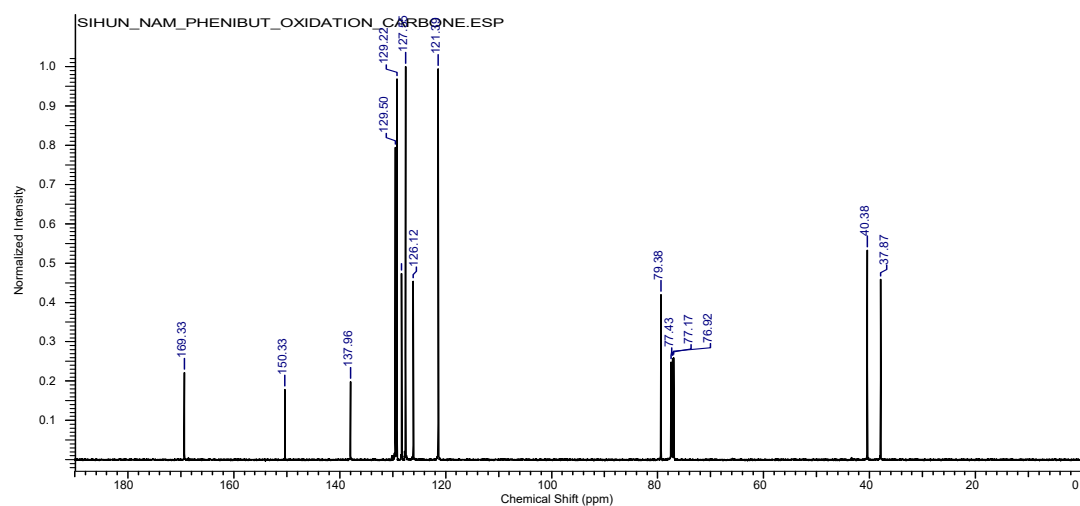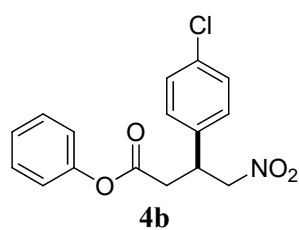

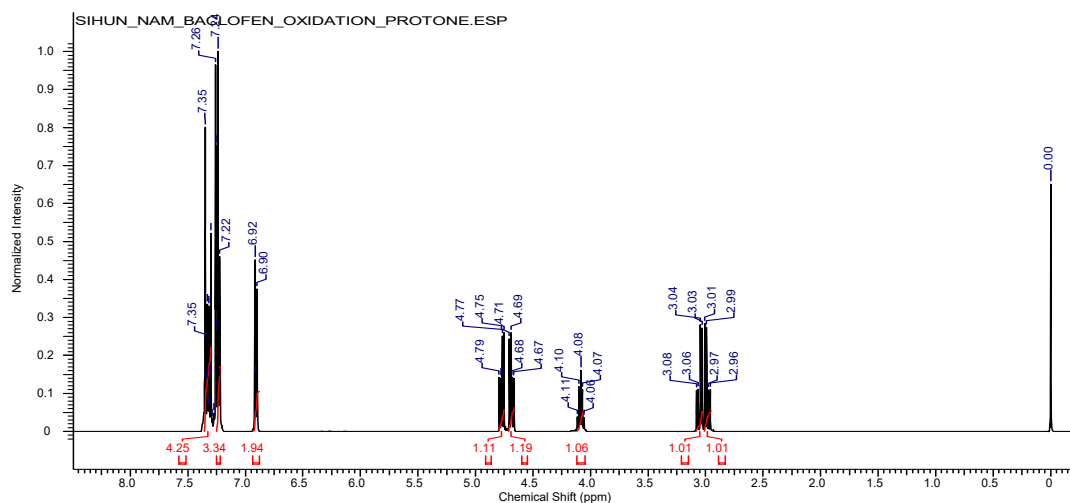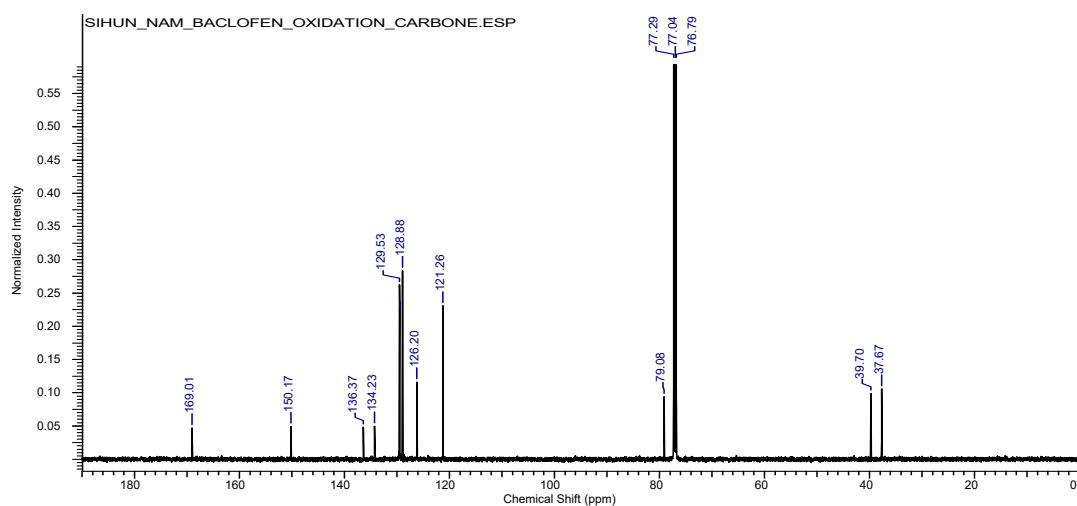

**(*R* or *S*)-4-Phenylpyrrolidin-2-one(4c, 4e)**

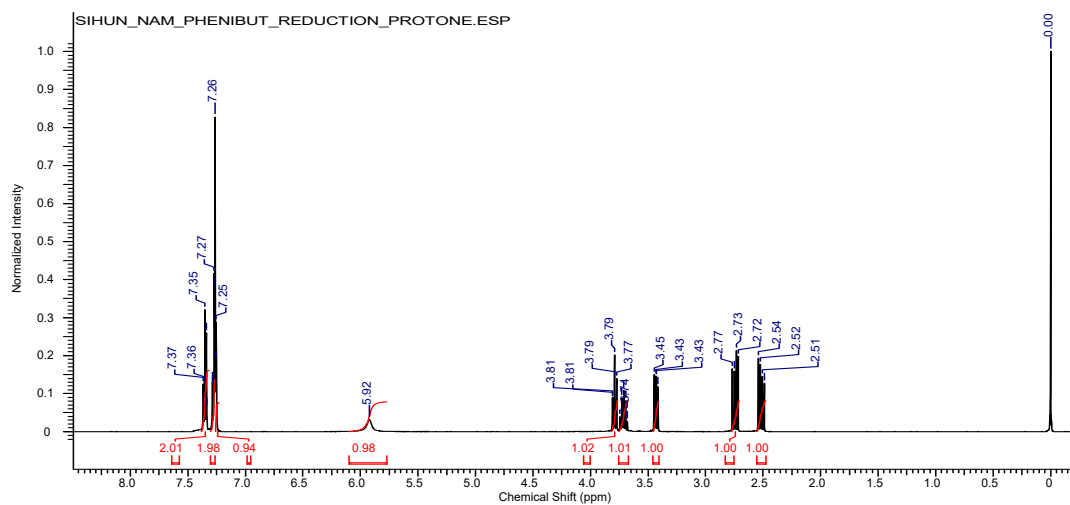

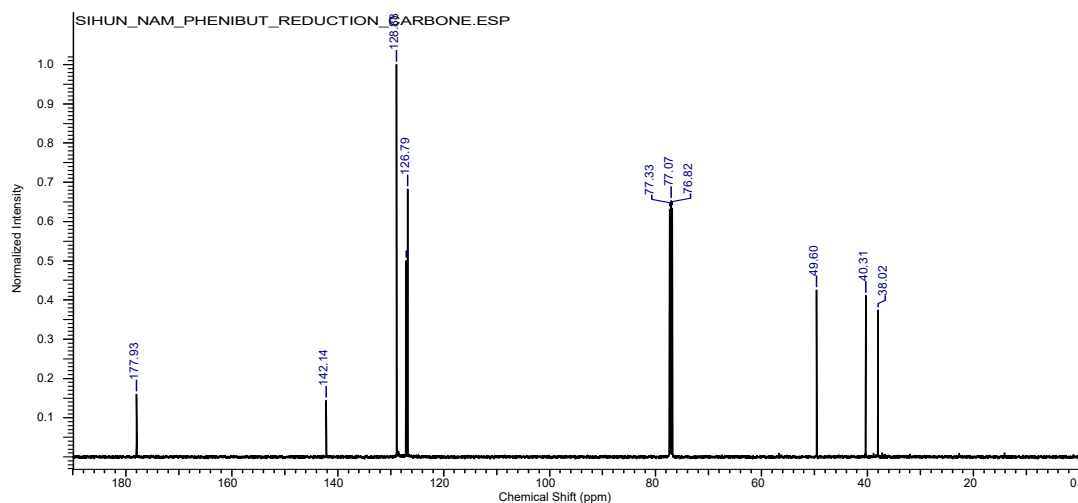

**(*R* or *S*)-4-(4-Chlorophenyl)pyrrolidin-2-one (4d, 4f)**

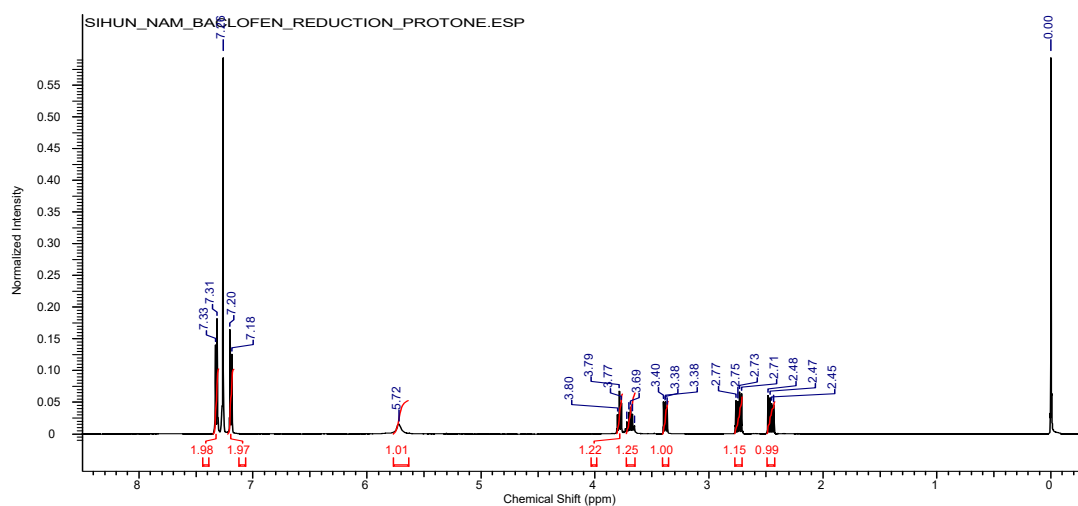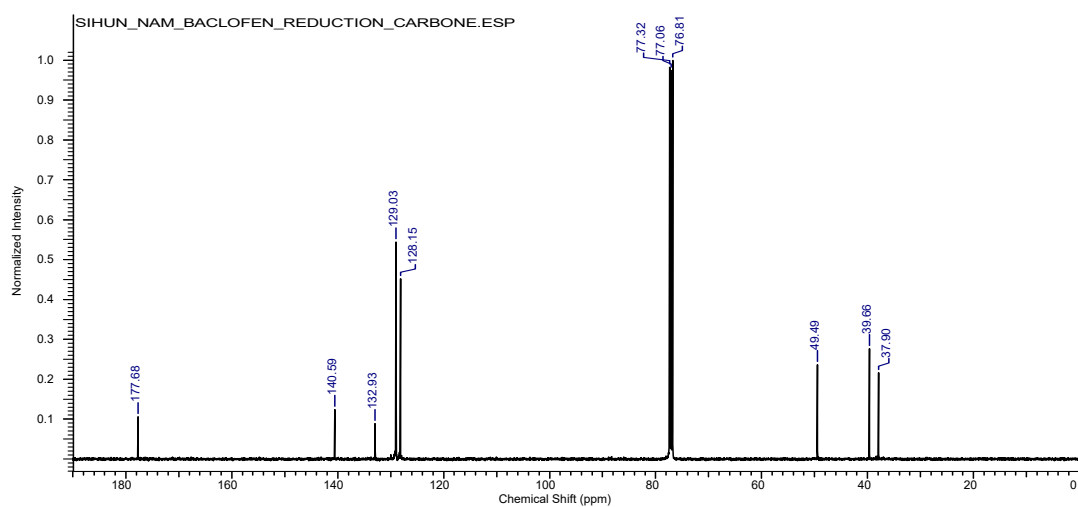



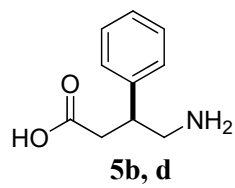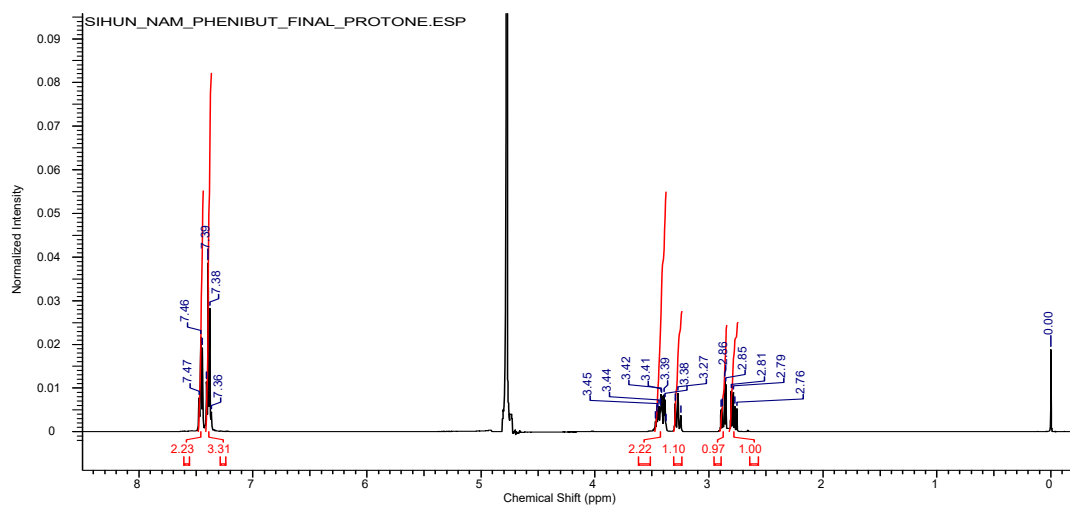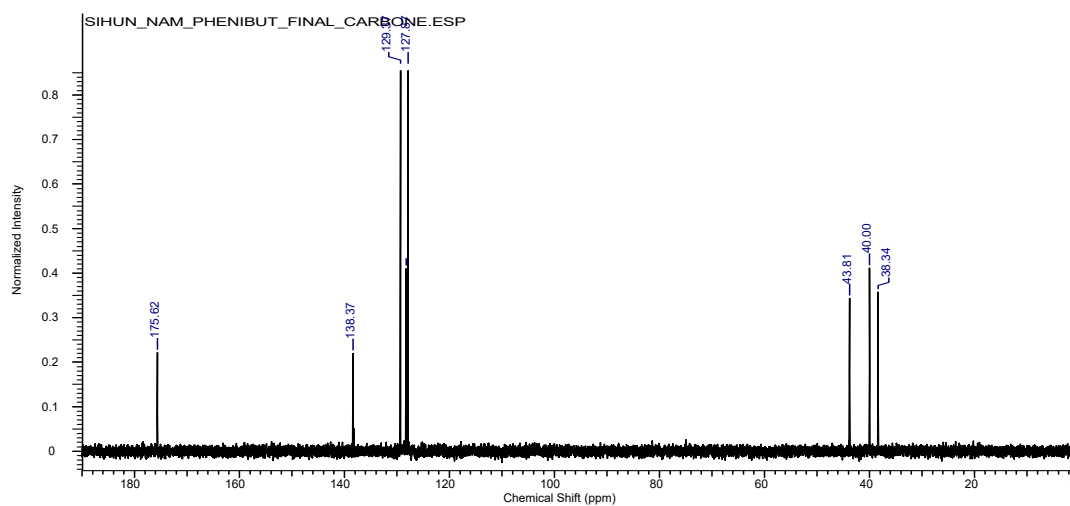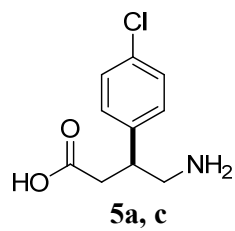

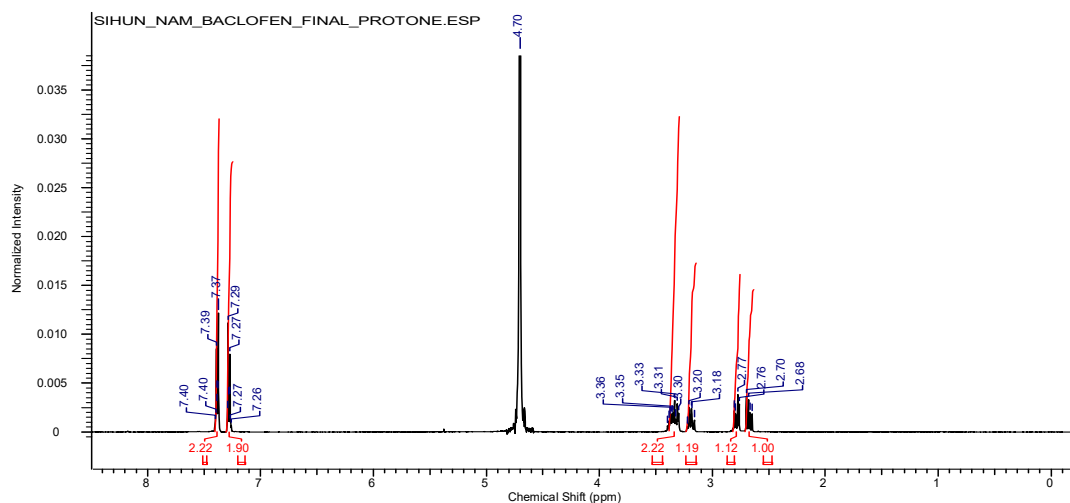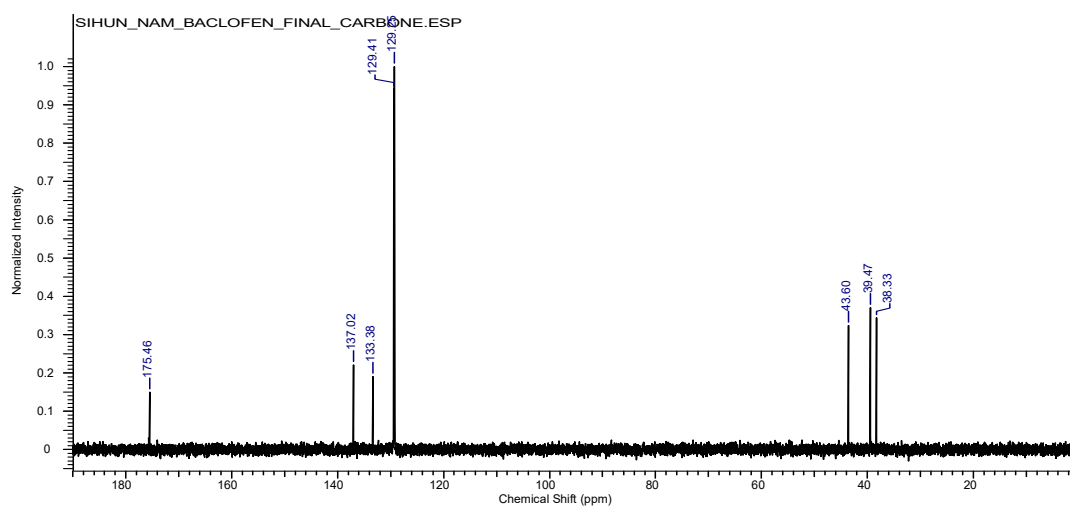

**(R or S)-Phenylpiracetam(5e, f)**

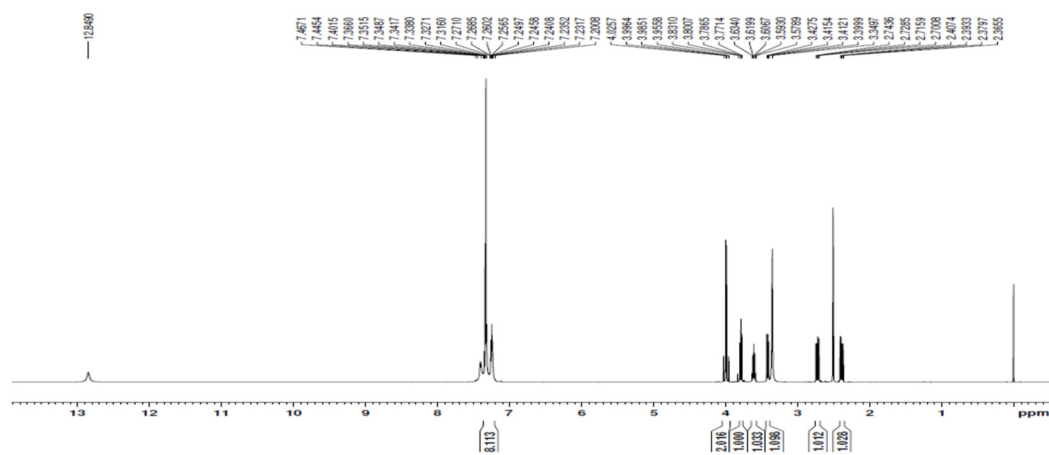

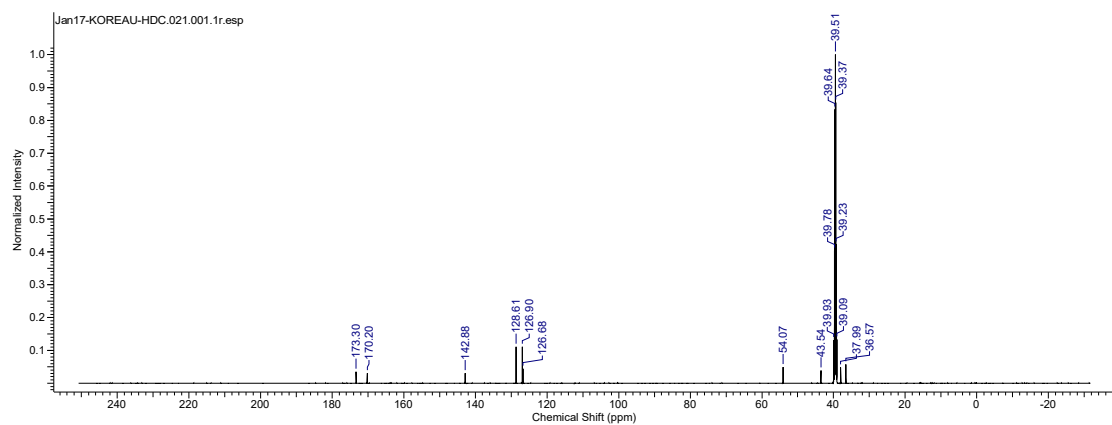

# Computational Results of DFT Calculations for all Calculated Structures

## Results of DFT Calculations and Discussion

Density functional theory(DFT) calculations were performed with the Gaussian 16 and Gauss-View 6.0 programs. DFT computations were performed to show the mechanism of the substrates and catalysis. B3LYP/6-31G(d,p)-calculated transition state of the DPEN-thiourea-catalyzed enantioselective Michael reaction. Transition state structures for the C–C bond formation, through which the main product (*R* or *S*) is possibly formed, are also shown.. The geometries of the reactants, intermediates (IM), transition states (TS). The temperature-dependent enthalpy corrections and the entropy effects are computed at 298 K and 1 atm of pressure

**1(catalyst 1m)**

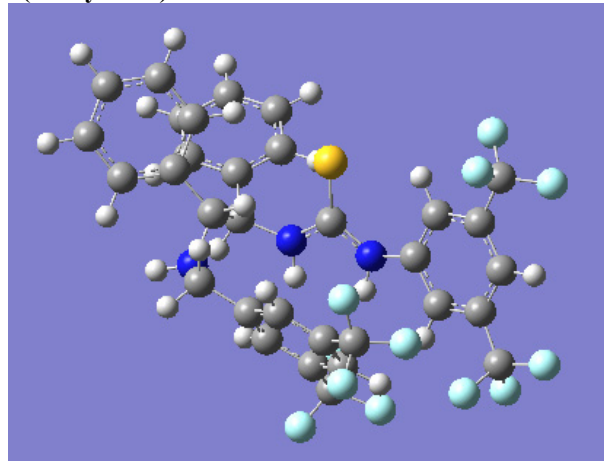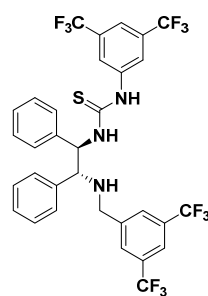

Symbolic Z-matrix:

Charge = 0 Multiplicity = 1

|   |          |          |          |
|---|----------|----------|----------|
| C | -5.51804 | -1.90252 | 0.49784  |
| C | -4.52694 | -0.92761 | 0.66864  |
| C | -4.72903 | 0.08481  | 1.61809  |
| C | -5.89609 | 0.12257  | 2.38076  |
| C | -6.87971 | -0.85451 | 2.20577  |
| C | -6.6883  | -1.86385 | 1.26062  |
| H | -5.39522 | -2.68453 | -0.24285 |
| H | -3.96768 | 0.84793  | 1.74045  |
| H | -6.03764 | 0.91179  | 3.11038  |
| H | -7.78627 | -0.82846 | 2.79964  |
| H | -7.44901 | -2.62322 | 1.11629  |
| C | -4.32266 | 1.02503  | -1.55162 |
| C | -5.63206 | 0.65918  | -1.89917 |
| C | -6.62955 | 1.62295  | -2.04226 |
| C | -6.32742 | 2.97378  | -1.85342 |
| C | -5.0249  | 3.34589  | -1.51794 |
| C | -4.02677 | 2.3795   | -1.36876 |
| H | -5.87329 | -0.38872 | -2.04232 |
| H | -7.6382  | 1.32112  | -2.30121 |
| H | -7.09934 | 3.72647  | -1.96654 |
| H | -4.78068 | 4.39137  | -1.36739 |
| H | -3.02715 | 2.66858  | -1.07783 |

|   |          |          |          |
|---|----------|----------|----------|
| C | -3.22233 | -0.93177 | -0.12824 |
| C | -3.27477 | -0.08203 | -1.45688 |
| N | -1.89886 | 0.33479  | -1.849   |
| N | -2.7184  | -2.27859 | -0.5043  |
| H | -3.53542 | -0.80788 | -2.23381 |
| H | -2.46276 | -0.46413 | 0.49821  |
| H | -3.43699 | -2.82396 | -0.99002 |
| H | -1.63245 | -0.03773 | -2.76664 |
| C | -0.91949 | 0.88302  | -1.08778 |
| C | 1.78154  | 2.39795  | -0.55994 |
| C | 3.05303  | 2.74768  | -0.11892 |
| C | 4.14004  | 1.89514  | -0.27046 |
| C | 3.93035  | 0.66968  | -0.88928 |
| C | 2.67232  | 0.29943  | -1.35087 |
| C | 1.5748   | 1.15408  | -1.17254 |
| H | 0.96144  | 3.08398  | -0.42703 |
| H | 5.12522  | 2.18809  | 0.0624   |
| H | 2.54211  | -0.66772 | -1.816   |
| N | 0.32914  | 0.71344  | -1.65499 |
| H | 0.38863  | -0.02632 | -2.36656 |
| F | 6.26389  | 0.29406  | -0.99869 |
| F | 4.91066  | -1.15723 | -2.03392 |
| F | 5.06082  | -1.14307 | 0.17064  |
| F | 3.06293  | 3.96191  | 1.93574  |
| F | 4.52324  | 4.52428  | 0.37843  |
| F | 2.35056  | 4.99144  | 0.11615  |
| C | 5.03667  | -0.31718 | -0.9548  |
| C | 3.24357  | 4.0518   | 0.5759   |
| C | -2.12866 | -3.03927 | 0.63078  |
| C | -0.64483 | -2.71686 | 0.74633  |
| C | 0.27034  | -3.31558 | -0.12524 |
| C | -0.17298 | -1.77249 | 1.66211  |
| C | 1.62242  | -2.98153 | -0.06803 |
| H | -0.06837 | -4.05184 | -0.8438  |
| C | 1.17942  | -1.43634 | 1.69866  |
| H | -0.85654 | -1.26414 | 2.32943  |
| C | 2.09148  | -2.0358  | 0.84123  |
| H | 3.13114  | -1.74099 | 0.84237  |
| H | -2.63455 | -2.83032 | 1.58464  |
| H | -2.2473  | -4.10765 | 0.41937  |
| C | 1.66446  | -0.42279 | 2.67955  |
| C | 2.56765  | -3.56672 | -1.04699 |
| F | 2.13909  | -1.00714 | 3.8359   |
| F | 2.70574  | 0.3032   | 2.14994  |
| F | 0.65709  | 0.43162  | 3.04702  |
| F | 2.61928  | -2.83347 | -2.24594 |
| F | 2.16424  | -4.83422 | -1.44998 |
| F | 3.84779  | -3.63205 | -0.58698 |
| S | -1.15826 | 1.67832  | 0.44457  |

### 2(malononitrile)

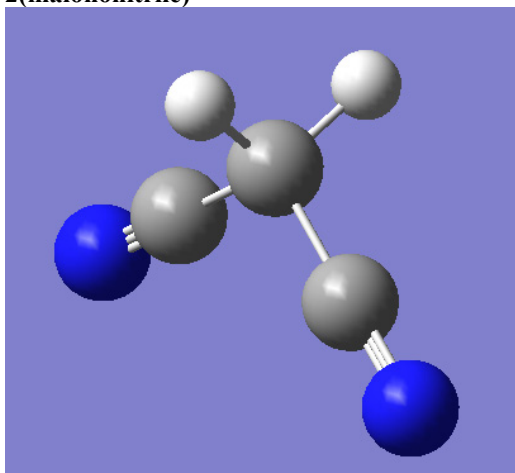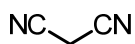

Symbolic Z-matrix:

Charge = 0 Multiplicity = 1

|   |          |          |          |
|---|----------|----------|----------|
| C | 0.       | 1.21914  | 0.06229  |
| C | 0.       | 0.       | 0.729    |
| C | 0.       | -1.21914 | 0.06229  |
| N | 0.       | 2.25282  | -0.49548 |
| N | 0.       | -2.25282 | -0.49548 |
| H | 0.86082  | 0.       | 1.36453  |
| H | -0.86082 | 0.       | 1.36453  |

### 3(nitrostyrene)

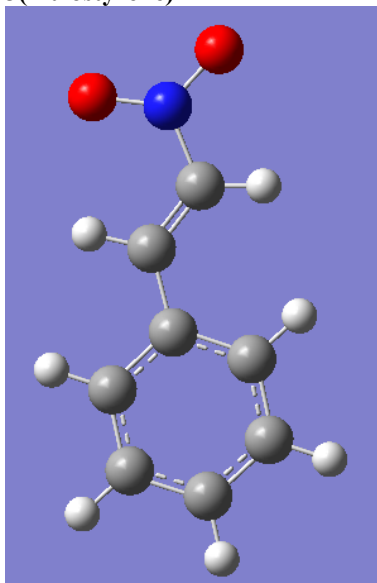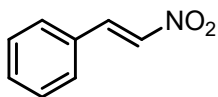

Symbolic Z-matrix:

Charge = 0 Multiplicity = 1

|   |         |          |          |
|---|---------|----------|----------|
| O | 1.76001 | -1.37716 | -1.98564 |
| O | 3.19823 | -1.11784 | -0.47478 |
| N | 2.64614 | -1.84859 | -1.29    |
| C | 3.02612 | -3.24943 | -1.44281 |
| C | 3.98661 | -3.84953 | -0.71215 |
| H | 4.55649 | -3.30056 | 0.05538  |
| C | 4.32701 | -5.25174 | -0.89146 |
| C | 5.35038 | -5.81206 | -0.11593 |
| C | 3.65025 | -6.05169 | -1.82031 |
| C | 5.687   | -7.15035 | -0.27298 |

|   |         |          |          |
|---|---------|----------|----------|
| H | 5.8857  | -5.19524 | 0.6162   |
| C | 3.9914  | -7.38882 | -1.97192 |
| H | 2.84485 | -5.60325 | -2.42362 |
| C | 5.00976 | -7.93918 | -1.19895 |
| H | 6.48748 | -7.58613 | 0.33496  |
| H | 3.45723 | -8.00967 | -2.69941 |
| H | 5.27819 | -8.99461 | -1.31863 |
| H | 2.46517 | -3.83548 | -2.2003  |

IM 1

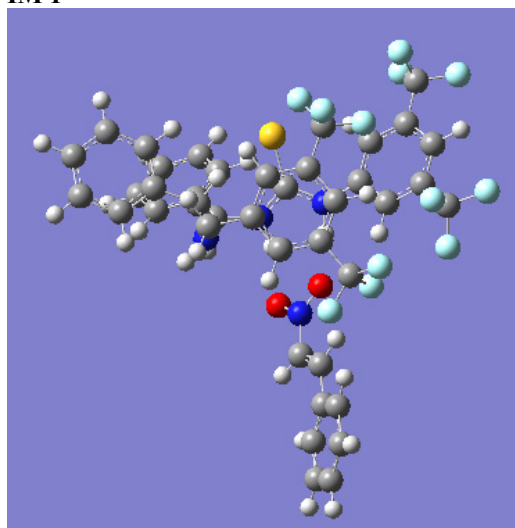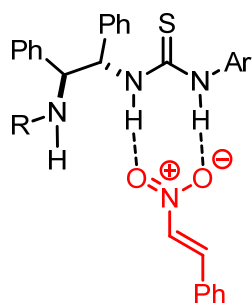

Symbolic Z-matrix:

Charge = 0 Multiplicity = 1

|   |         |          |          |
|---|---------|----------|----------|
| C | 4.09992 | -3.08706 | 2.1835   |
| C | 2.80501 | -3.28171 | 1.68628  |
| C | 2.18559 | -4.52544 | 1.87792  |
| C | 2.84543 | -5.55279 | 2.55191  |
| C | 4.13667 | -5.35055 | 3.0465   |
| C | 4.76197 | -4.11689 | 2.85727  |
| H | 4.60853 | -2.14179 | 2.0318   |
| H | 1.18814 | -4.68079 | 1.48051  |
| H | 2.35334 | -6.50859 | 2.69171  |
| H | 4.65009 | -6.14696 | 3.57313  |
| H | 5.76554 | -3.95384 | 3.23466  |
| C | 2.63919 | -3.515   | -1.26366 |
| C | 4.00387 | -3.84116 | -1.24332 |
| C | 4.47002 | -5.00479 | -1.85406 |
| C | 3.57638 | -5.85537 | -2.5095  |
| C | 2.21923 | -5.53196 | -2.54279 |
| C | 1.75138 | -4.36892 | -1.92564 |
| H | 4.70151 | -3.18669 | -0.7317  |
| H | 5.52647 | -5.24614 | -1.81962 |
| H | 3.9351  | -6.75952 | -2.98806 |
| H | 1.51739 | -6.18642 | -3.04721 |
| H | 0.6958  | -4.13826 | -1.92614 |
| C | 2.03037 | -2.18478 | 0.95572  |
| C | 2.2105  | -2.20197 | -0.61188 |
| N | 1.04656 | -1.53935 | -1.26516 |
| N | 2.32824 | -0.79893 | 1.40293  |
| H | 3.02484 | -1.49489 | -0.79981 |
| H | 0.97099 | -2.36443 | 1.13883  |
| H | 3.33412 | -0.60602 | 1.37631  |
| H | 1.3292  | -0.71681 | -1.80863 |

|   |          |          |          |
|---|----------|----------|----------|
| C | -0.27868 | -1.71208 | -1.03478 |
| C | -3.34589 | -1.48013 | -1.67325 |
| C | -4.70752 | -1.20638 | -1.60597 |
| C | -5.18427 | 0.06377  | -1.30463 |
| C | -4.25893 | 1.07392  | -1.07661 |
| C | -2.89197 | 0.83125  | -1.14947 |
| C | -2.41748 | -0.45838 | -1.42965 |
| H | -3.01136 | -2.47645 | -1.91053 |
| H | -6.24531 | 0.26466  | -1.27248 |
| H | -2.19945 | 1.63781  | -0.95308 |
| N | -1.02299 | -0.63594 | -1.47917 |
| H | -0.49105 | 0.2313   | -1.62767 |
| F | -5.98129 | 2.69602  | -1.10339 |
| F | -3.86161 | 3.40751  | -1.00361 |
| F | -4.81757 | 2.48566  | 0.76251  |
| F | -6.00156 | -2.97017 | -0.65172 |
| F | -6.86022 | -1.83413 | -2.33877 |
| F | -5.17001 | -3.26112 | -2.6771  |
| C | -4.72676 | 2.40904  | -0.6286  |
| C | -5.67898 | -2.31611 | -1.81707 |
| C | 1.74004  | -0.45367 | 2.72567  |
| C | 0.33702  | 0.10555  | 2.53112  |
| C | 0.16388  | 1.4288   | 2.11315  |
| C | -0.79623 | -0.69677 | 2.68976  |
| C | -1.11366 | 1.93221  | 1.87347  |
| H | 1.02509  | 2.07277  | 1.9838   |
| C | -2.06718 | -0.18528 | 2.4321   |
| H | -0.69901 | -1.73484 | 2.97949  |
| C | -2.24274 | 1.13033  | 2.02622  |
| H | -3.22514 | 1.51052  | 1.78509  |
| H | 1.71067  | -1.31404 | 3.41001  |
| H | 2.37093  | 0.3148   | 3.18573  |
| C | -3.26509 | -1.05751 | 2.60219  |
| C | -1.27707 | 3.31154  | 1.35865  |
| F | -3.84131 | -0.90868 | 3.84706  |
| F | -4.2331  | -0.735   | 1.67984  |
| F | -2.93568 | -2.38176 | 2.46919  |
| F | -1.1818  | 3.3749   | -0.04303 |
| F | -0.25512 | 4.14427  | 1.79897  |
| F | -2.47661 | 3.8689   | 1.68282  |
| S | -0.99409 | -3.08962 | -0.2422  |
| C | 2.47141  | 3.00452  | -1.542   |
| C | 1.90445  | 4.0025   | -0.82864 |
| O | 2.35031  | 0.82755  | -2.38649 |
| O | 0.47391  | 1.78253  | -1.50111 |
| N | 1.72677  | 1.83195  | -1.81872 |
| C | 2.54101  | 5.23864  | -0.43201 |
| C | 1.81579  | 6.09876  | 0.42448  |
| C | 3.83763  | 5.61733  | -0.85293 |
| C | 2.36162  | 7.31166  | 0.83016  |
| H | 0.85054  | 5.77518  | 0.79209  |
| C | 4.37195  | 6.83184  | -0.4427  |
| H | 4.4329   | 4.9654   | -1.48225 |
| C | 3.63537  | 7.68407  | 0.39133  |
| H | 1.80082  | 7.96304  | 1.48898  |
| H | 5.3642   | 7.1186   | -0.76862 |
| H | 4.05971  | 8.63101  | 0.70355  |
| H | 3.48147  | 2.98117  | -1.91021 |
| H | 0.8751   | 3.85369  | -0.51937 |



# IM 2(catalyst+malonitrile)

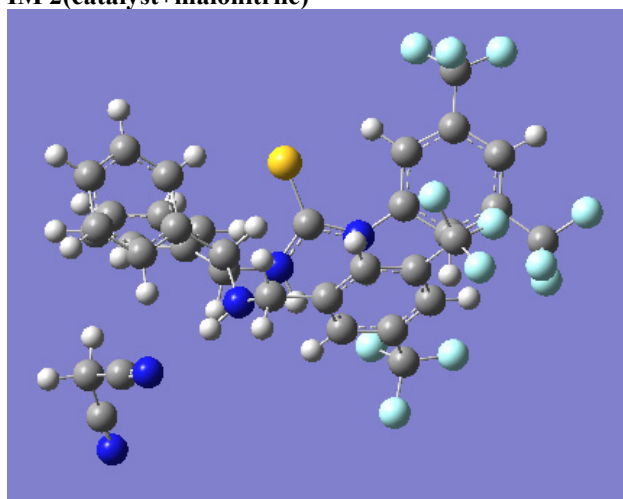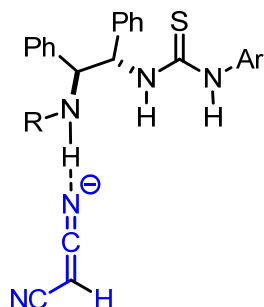

Symbolic Z-matrix:

Charge = 0 Multiplicity = 1

|   |          |          |          |
|---|----------|----------|----------|
| C | 4.09992  | -3.08706 | 2.1835   |
| C | 2.80501  | -3.28171 | 1.68628  |
| C | 2.18559  | -4.52544 | 1.87792  |
| C | 2.84543  | -5.55279 | 2.55191  |
| C | 4.13667  | -5.35055 | 3.0465   |
| C | 4.76197  | -4.11689 | 2.85727  |
| H | 4.60853  | -2.14179 | 2.0318   |
| H | 1.18814  | -4.68079 | 1.48051  |
| H | 2.35334  | -6.50859 | 2.69171  |
| H | 4.65009  | -6.14696 | 3.57313  |
| H | 5.76554  | -3.95384 | 3.23466  |
| C | 2.63919  | -3.515   | -1.26366 |
| C | 4.00387  | -3.84116 | -1.24332 |
| C | 4.47002  | -5.00479 | -1.85406 |
| C | 3.57638  | -5.85537 | -2.5095  |
| C | 2.21923  | -5.53196 | -2.54279 |
| C | 1.75138  | -4.36892 | -1.92564 |
| H | 4.70151  | -3.18669 | -0.7317  |
| H | 5.52647  | -5.24614 | -1.81962 |
| H | 3.9351   | -6.75952 | -2.98806 |
| H | 1.51739  | -6.18642 | -3.04721 |
| H | 0.6958   | -4.13826 | -1.92614 |
| C | 2.03037  | -2.18478 | 0.95572  |
| C | 2.2105   | -2.20197 | -0.61188 |
| N | 1.04656  | -1.53935 | -1.26516 |
| N | 2.32824  | -0.79893 | 1.40293  |
| H | 3.02484  | -1.49489 | -0.79981 |
| H | 0.97099  | -2.36443 | 1.13883  |
| H | 3.33412  | -0.60602 | 1.37631  |
| H | 1.3292   | -0.71681 | -1.80863 |
| C | -0.27868 | -1.71208 | -1.03478 |
| C | -3.34589 | -1.48013 | -1.67325 |
| C | -4.70752 | -1.20638 | -1.60597 |
| C | -5.18427 | 0.06377  | -1.30463 |
| C | -4.25893 | 1.07392  | -1.07661 |
| C | -2.89197 | 0.83125  | -1.14947 |
| C | -2.41748 | -0.45838 | -1.42965 |
| H | -3.01136 | -2.47645 | -1.91053 |
| H | -6.24531 | 0.26466  | -1.27248 |
| H | -2.19945 | 1.63781  | -0.95308 |

|   |          |          |          |
|---|----------|----------|----------|
| N | -1.02299 | -0.63594 | -1.47917 |
| H | -0.49105 | 0.2313   | -1.62767 |
| F | -5.98129 | 2.69602  | -1.10339 |
| F | -3.86161 | 3.40751  | -1.00361 |
| F | -4.81757 | 2.48566  | 0.76251  |
| F | -6.00156 | -2.97017 | -0.65172 |
| F | -6.86022 | -1.83413 | -2.33877 |
| F | -5.17001 | -3.26112 | -2.6771  |
| C | -4.72676 | 2.40904  | -0.6286  |
| C | -5.67898 | -2.31611 | -1.81707 |
| C | 1.74004  | -0.45367 | 2.72567  |
| C | 0.33702  | 0.10555  | 2.53112  |
| C | 0.16388  | 1.4288   | 2.11315  |
| C | -0.79623 | -0.69677 | 2.68976  |
| C | -1.11366 | 1.93221  | 1.87347  |
| H | 1.02509  | 2.07277  | 1.9838   |
| C | -2.06718 | -0.18528 | 2.4321   |
| H | -0.69901 | -1.73484 | 2.97949  |
| C | -2.24274 | 1.13033  | 2.02622  |
| H | -3.22514 | 1.51052  | 1.78509  |
| H | 1.71067  | -1.31404 | 3.41001  |
| H | 2.37093  | 0.3148   | 3.18573  |
| C | -3.26509 | -1.05751 | 2.60219  |
| C | -1.27707 | 3.31154  | 1.35865  |
| F | -3.84131 | -0.90868 | 3.84706  |
| F | -4.2331  | -0.735   | 1.67984  |
| F | -2.93568 | -2.38176 | 2.46919  |
| F | -1.1818  | 3.3749   | -0.04303 |
| F | -0.25512 | 4.14427  | 1.79897  |
| F | -2.47661 | 3.8689   | 1.68282  |
| S | -0.99409 | -3.08962 | -0.2422  |
| C | 5.47842  | 0.10207  | -0.71714 |
| C | 5.43973  | 0.64252  | -2.07628 |
| H | 4.39077  | 0.58399  | -2.41957 |
| N | 5.44927  | -0.3372  | 0.35871  |
| C | 5.83212  | 2.05145  | -2.12411 |
| N | 6.07357  | 3.1884   | -2.1672  |
| H | 6.07142  | 0.04355  | -2.7436  |

IM 3

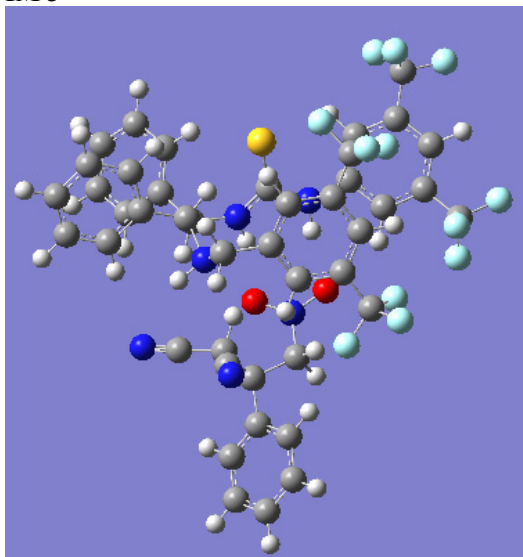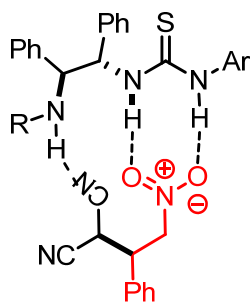

Symbolic Z-matrix:

Charge = 0 Multiplicity = 1

|   |          |          |          |
|---|----------|----------|----------|
| C | -4.16349 | 3.4134   | 1.2075   |
| C | -2.76927 | 3.46648  | 1.37128  |
| C | -2.21816 | 4.5019   | 2.13559  |
| C | -3.03851 | 5.46198  | 2.73347  |
| C | -4.42264 | 5.39741  | 2.57122  |
| C | -4.98246 | 4.37207  | 1.80335  |
| H | -4.62028 | 2.63489  | 0.60239  |
| H | -1.14121 | 4.56135  | 2.24977  |
| H | -2.59606 | 6.257    | 3.32258  |
| H | -5.06137 | 6.14054  | 3.0342   |
| H | -6.05635 | 4.32249  | 1.66461  |
| C | -2.0202  | 3.76168  | -1.46065 |
| C | -3.2318  | 4.02349  | -2.11592 |
| C | -3.44989 | 5.24513  | -2.75485 |
| C | -2.45155 | 6.22042  | -2.75157 |
| C | -1.23903 | 5.96398  | -2.10674 |
| C | -1.02177 | 4.74454  | -1.46392 |
| H | -4.01164 | 3.26808  | -2.12272 |
| H | -4.39382 | 5.43169  | -3.25408 |
| H | -2.61559 | 7.16993  | -3.24814 |
| H | -0.45742 | 6.71521  | -2.10303 |
| H | -0.08013 | 4.54101  | -0.97167 |
| C | -1.86323 | 2.39768  | 0.77674  |
| C | -1.84707 | 2.40248  | -0.78618 |
| N | -0.69066 | 1.62057  | -1.32341 |
| N | -2.27659 | 1.0155   | 1.25036  |
| H | -2.71168 | 1.80329  | -1.09065 |
| H | -0.84032 | 2.57251  | 1.10807  |
| H | -3.29936 | 1.03764  | 1.36219  |
| H | -0.99332 | 0.92251  | -2.00629 |
| C | 0.62359  | 1.63163  | -0.99724 |
| C | 3.72661  | 1.14567  | -1.42795 |
| C | 5.02987  | 0.69632  | -1.24495 |
| C | 5.31627  | -0.64863 | -1.04165 |
| C | 4.26226  | -1.5517  | -1.02291 |
| C | 2.94954  | -1.12882 | -1.20353 |
| C | 2.66847  | 0.22932  | -1.3953  |
| H | 3.537    | 2.19333  | -1.59582 |
| H | 6.33577  | -0.98511 | -0.92269 |
| H | 2.14757  | -1.85194 | -1.1556  |
| N | 1.31495  | 0.59031  | -1.58768 |
| H | 0.76131  | -0.14833 | -2.0342  |
| F | 5.81337  | -3.33436 | -0.98126 |
| F | 3.66676  | -3.81604 | -1.37721 |
| F | 4.32753  | -3.2514  | 0.65375  |
| F | 6.38833  | 2.18785  | 0.02871  |
| F | 7.31456  | 1.10908  | -1.66092 |
| F | 5.85459  | 2.76348  | -2.0357  |
| C | 4.51785  | -2.9786  | -0.70222 |
| C | 6.14174  | 1.68803  | -1.22778 |
| C | -1.69142 | 0.66201  | 2.59798  |
| C | -0.39469 | -0.10855 | 2.42662  |
| C | -0.44482 | -1.432   | 1.9765   |
| C | 0.85285  | 0.47455  | 2.64732  |
| C | 0.72588  | -2.13374 | 1.70953  |
| H | -1.39989 | -1.91908 | 1.84529  |
| C | 2.02119  | -0.24709 | 2.39889  |
| H | 0.93351  | 1.50205  | 2.97391  |

|   |          |          |          |
|---|----------|----------|----------|
| C | 1.97495  | -1.54537 | 1.91128  |
| H | 2.8838   | -2.06831 | 1.64696  |
| H | -1.53173 | 1.55492  | 3.21616  |
| H | -2.42069 | 0.02249  | 3.10645  |
| C | 3.34651  | 0.38741  | 2.65653  |
| C | 0.65686  | -3.51429 | 1.16746  |
| F | 3.83876  | 0.06238  | 3.9033   |
| F | 4.2787   | -0.0439  | 1.7412   |
| F | 3.26199  | 1.75537  | 2.60462  |
| F | 1.38773  | -3.64259 | -0.00049 |
| F | -0.6695  | -3.85424 | 0.84133  |
| F | 1.10597  | -4.48265 | 2.0167   |
| S | 1.41845  | 2.76191  | 0.06786  |
| C | -2.13396 | -2.86002 | -1.68041 |
| C | -3.58578 | -2.48332 | -1.38178 |
| O | -2.01759 | -0.60023 | -2.52846 |
| O | -0.09945 | -1.80463 | -2.32316 |
| N | -1.36737 | -1.66599 | -2.2213  |
| C | -4.39014 | -3.73039 | -1.04348 |
| C | -3.8852  | -4.71492 | -0.1786  |
| C | -5.66426 | -3.89564 | -1.60132 |
| C | -4.64919 | -5.84547 | 0.11444  |
| H | -2.90856 | -4.60312 | 0.2794   |
| C | -6.42694 | -5.02525 | -1.3021  |
| H | -6.06006 | -3.13794 | -2.26937 |
| C | -5.91896 | -6.00326 | -0.44497 |
| H | -4.25318 | -6.59918 | 0.78425  |
| H | -7.41186 | -5.14105 | -1.73832 |
| H | -6.50873 | -6.88191 | -0.21278 |
| H | -2.07587 | -3.62169 | -2.46311 |
| C | -3.88305 | -1.92401 | 1.08955  |
| C | -3.6735  | -1.3735  | -0.24926 |
| N | -3.98944 | -2.32002 | 2.17859  |
| H | -1.55421 | -3.17913 | -0.81621 |
| C | -4.71928 | -0.39338 | -0.55618 |
| N | -5.4953  | 0.43897  | -0.80142 |
| H | -2.74928 | -0.76774 | -0.17475 |
| H | -3.99834 | -2.02808 | -2.28482 |

TS 1

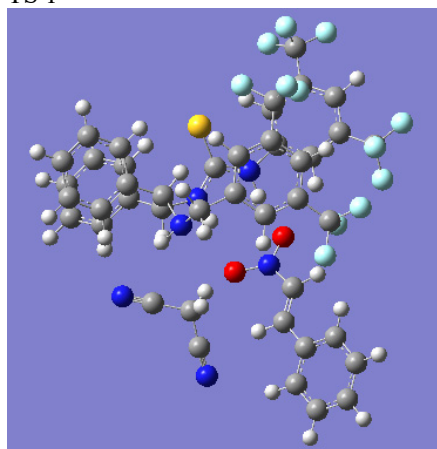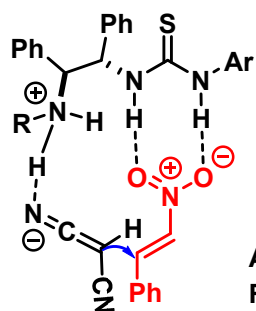

Ar = 3,5-(CF<sub>3</sub>)<sub>2</sub>-Ph  
R = 3,5-(CF<sub>3</sub>)<sub>2</sub>-Ph-CH<sub>2</sub>

Symbolic Z-matrix:

Charge = 0 Multiplicity = 1

|   |          |         |         |
|---|----------|---------|---------|
| C | -2.30021 | 4.78175 | 1.79351 |
| C | -1.08941 | 4.11784 | 1.54788 |

|   |          |          |          |
|---|----------|----------|----------|
| C | 0.10158  | 4.6923   | 2.01469  |
| C | 0.08386  | 5.89388  | 2.72513  |
| C | -1.12752 | 6.54035  | 2.97683  |
| C | -2.31782 | 5.98376  | 2.50285  |
| H | -3.23527 | 4.38959  | 1.40776  |
| H | 1.04241  | 4.20221  | 1.78907  |
| H | 1.01425  | 6.3241   | 3.07796  |
| H | -1.14444 | 7.47319  | 3.52865  |
| H | -3.26078 | 6.48944  | 2.67763  |
| C | -1.01943 | 4.2032   | -1.44196 |
| C | -2.19273 | 4.93555  | -1.68382 |
| C | -2.14456 | 6.17314  | -2.32629 |
| C | -0.92047 | 6.69374  | -2.74894 |
| C | 0.24983  | 5.96886  | -2.51739 |
| C | 0.20409  | 4.73381  | -1.86775 |
| H | -3.15067 | 4.54237  | -1.36019 |
| H | -3.06179 | 6.72434  | -2.49998 |
| H | -0.87947 | 7.6526   | -3.25312 |
| H | 1.2063   | 6.36489  | -2.83956 |
| H | 1.11489  | 4.18811  | -1.67061 |
| C | -1.02192 | 2.77972  | 0.81953  |
| C | -1.16993 | 2.84787  | -0.75023 |
| N | -0.37972 | 1.73228  | -1.36181 |
| N | -2.04845 | 1.7753   | 1.29944  |
| H | -2.20236 | 2.53914  | -0.92783 |
| H | -0.03921 | 2.35756  | 1.01734  |
| H | -2.92661 | 2.27806  | 1.48057  |
| H | -0.96842 | 1.06237  | -1.86338 |
| C | 0.92244  | 1.40025  | -1.17328 |
| C | 3.71151  | 0.11153  | -1.78257 |
| C | 4.89562  | -0.58613 | -1.57527 |
| C | 4.89214  | -1.8898  | -1.09332 |
| C | 3.66985  | -2.49299 | -0.83433 |
| C | 2.4667   | -1.8244  | -1.05653 |
| C | 2.48061  | -0.50355 | -1.51022 |
| H | 3.74416  | 1.11985  | -2.16076 |
| H | 5.81714  | -2.42625 | -0.94149 |
| H | 1.52932  | -2.31036 | -0.82503 |
| N | 1.24456  | 0.16189  | -1.68231 |
| H | 0.47053  | -0.44161 | -1.99814 |
| F | 4.8141   | -4.5109  | -0.37207 |
| F | 2.59905  | -4.6006  | -0.63316 |
| F | 3.46675  | -3.72306 | 1.20213  |
| F | 6.69068  | 0.7667   | -0.74999 |
| F | 7.15621  | -0.83097 | -2.19808 |
| F | 6.07097  | 1.01454  | -2.85282 |
| C | 3.64116  | -3.82798 | -0.19493 |
| C | 6.1971   | 0.0921   | -1.84032 |
| C | -1.65438 | 1.12925  | 2.59667  |
| C | -0.6034  | 0.04965  | 2.40284  |
| C | -0.95232 | -1.22183 | 1.92961  |
| C | 0.74153  | 0.31832  | 2.66585  |
| C | 0.02488  | -2.2032  | 1.74075  |
| H | -1.98838 | -1.45625 | 1.7215   |
| C | 1.70774  | -0.65924 | 2.45256  |
| H | 1.05061  | 1.29887  | 3.00432  |
| C | 1.36599  | -1.92425 | 2.00107  |
| H | 2.12959  | -2.65708 | 1.80457  |
| H | -1.2747  | 1.86665  | 3.31994  |

|   |          |          |          |
|---|----------|----------|----------|
| H | -2.55956 | 0.67931  | 3.02138  |
| C | 3.14268  | -0.36218 | 2.72326  |
| C | -0.36204 | -3.54132 | 1.21351  |
| F | 3.52682  | -0.75701 | 3.98746  |
| F | 3.94231  | -1.04344 | 1.83541  |
| F | 3.39359  | 0.98212  | 2.62695  |
| F | -0.14567 | -3.65786 | -0.17455 |
| F | -1.72634 | -3.75342 | 1.37652  |
| F | 0.30061  | -4.59866 | 1.74686  |
| S | 2.10375  | 2.35988  | -0.31204 |
| C | -2.70419 | -2.59627 | -1.38173 |
| C | -4.0519  | -2.61213 | -1.4325  |
| O | -2.53431 | -0.33869 | -2.11953 |
| O | -0.72831 | -1.73829 | -2.18703 |
| N | -1.97241 | -1.50207 | -1.91649 |
| C | -4.89956 | -3.66072 | -0.89826 |
| C | -4.41393 | -4.65248 | -0.01548 |
| C | -6.26032 | -3.68292 | -1.27692 |
| C | -5.26018 | -5.65821 | 0.4328   |
| H | -3.4016  | -4.59335 | 0.35964  |
| C | -7.09806 | -4.6989  | -0.8265  |
| H | -6.65659 | -2.88124 | -1.88712 |
| C | -6.59818 | -5.69388 | 0.01766  |
| H | -4.88578 | -6.41174 | 1.11498  |
| H | -8.13923 | -4.70959 | -1.12407 |
| H | -7.25108 | -6.48403 | 0.36916  |
| C | -4.7519  | 0.70497  | -0.17543 |
| H | -2.05234 | -3.35638 | -0.99161 |
| C | -4.86533 | 2.15917  | -0.0846  |
| N | -4.9326  | 3.31744  | -0.00591 |
| H | -3.84842 | 0.43827  | -0.74975 |
| H | -4.54476 | -1.79187 | -1.9437  |
| C | -5.91279 | 0.11711  | -0.84536 |
| N | -6.79831 | -0.38379 | -1.40887 |
| H | -4.64114 | 0.27761  | 0.82813  |

TS 2

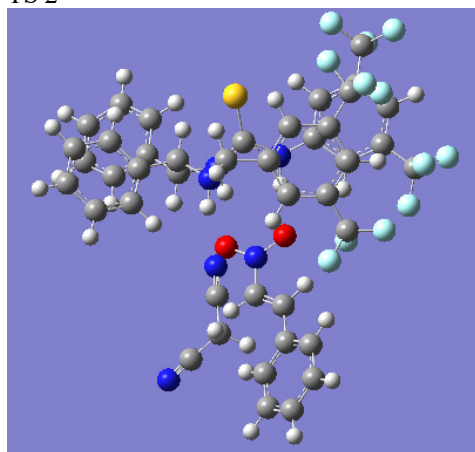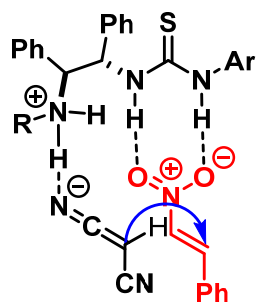

Ar = 3,5-(CF<sub>3</sub>)<sub>2</sub>-Ph  
R = 3,5-(CF<sub>3</sub>)<sub>2</sub>-Ph-CH<sub>2</sub>

Symbolic Z-matrix:

Charge = 0 Multiplicity = 1

|   |          |         |         |
|---|----------|---------|---------|
| C | -4.10702 | 2.80325 | 1.60073 |
| C | -2.94523 | 3.54973 | 1.36493 |
| C | -2.95906 | 4.92187 | 1.65167 |
| C | -4.10602 | 5.5348  | 2.15728 |
| C | -5.26178 | 4.78309 | 2.38245 |

|   |          |          |          |
|---|----------|----------|----------|
| C | -5.25832 | 3.41523  | 2.10203  |
| H | -4.11148 | 1.7357   | 1.41124  |
| H | -2.0689  | 5.51156  | 1.46457  |
| H | -4.09776 | 6.59693  | 2.374    |
| H | -6.15349 | 5.25731  | 2.7762   |
| H | -6.15008 | 2.82387  | 2.27947  |
| C | -1.83035 | 4.37738  | -1.33501 |
| C | -3.10523 | 4.80723  | -1.72663 |
| C | -3.29721 | 6.08579  | -2.25248 |
| C | -2.21082 | 6.95065  | -2.39818 |
| C | -0.93604 | 6.52716  | -2.014   |
| C | -0.74344 | 5.24867  | -1.48695 |
| H | -3.95318 | 4.141    | -1.60948 |
| H | -4.29053 | 6.40329  | -2.5488  |
| H | -2.35551 | 7.94316  | -2.80969 |
| H | -0.08665 | 7.19154  | -2.12649 |
| H | 0.24148  | 4.91979  | -1.1798  |
| C | -1.67558 | 2.89669  | 0.80722  |
| C | -1.66195 | 2.97336  | -0.7629  |
| N | -0.50503 | 2.23837  | -1.34463 |
| N | -1.48306 | 1.49125  | 1.186    |
| H | -2.52497 | 2.38411  | -1.09909 |
| H | -0.802   | 3.44753  | 1.15996  |
| H | -2.25705 | 0.86788  | 0.95649  |
| H | -0.81763 | 1.57565  | -2.06107 |
| C | 0.74714  | 2.07071  | -0.85298 |
| C | 3.76813  | 1.21534  | -1.1089  |
| C | 5.02683  | 0.6272   | -1.04601 |
| C | 5.19432  | -0.75182 | -1.04775 |
| C | 4.05875  | -1.54793 | -1.13568 |
| C | 2.78938  | -0.98853 | -1.21577 |
| C | 2.62402  | 0.40832  | -1.19354 |
| H | 3.67471  | 2.28803  | -1.05674 |
| H | 6.17939  | -1.18974 | -0.97848 |
| H | 1.92694  | -1.63999 | -1.24909 |
| N | 1.31201  | 0.89313  | -1.3031  |
| H | 0.63712  | 0.18887  | -1.62813 |
| F | 5.37395  | -3.44813 | -1.62942 |
| F | 3.14678  | -3.66506 | -1.67037 |
| F | 4.2267   | -3.50155 | 0.25047  |
| F | 7.28409  | 0.89209  | -0.40593 |
| F | 6.66687  | 1.7826   | -2.3302  |
| F | 5.97842  | 2.70886  | -0.44776 |
| C | 4.19841  | -3.02502 | -1.06049 |
| C | 6.23231  | 1.5025   | -1.05183 |
| C | -0.86111 | 1.19824  | 2.4908   |
| C | 0.19358  | 0.10315  | 2.33929  |
| C | -0.1533  | -1.13494 | 1.79165  |
| C | 1.53073  | 0.33506  | 2.67561  |
| C | 0.82588  | -2.10329 | 1.56941  |
| H | -1.18219 | -1.34023 | 1.52288  |
| C | 2.49396  | -0.649   | 2.46429  |
| H | 1.84022  | 1.30036  | 3.05309  |
| C | 2.15872  | -1.87008 | 1.8952   |
| H | 2.92577  | -2.58366 | 1.63397  |
| H | -0.36709 | 2.10763  | 2.8416   |
| H | -1.59397 | 0.90165  | 3.25774  |
| C | 3.91014  | -0.39728 | 2.85408  |
| C | 0.46855  | -3.35632 | 0.87009  |

|   |          |          |          |
|---|----------|----------|----------|
| F | 4.19942  | -0.89954 | 4.10574  |
| F | 4.77654  | -1.01094 | 1.97725  |
| F | 4.18686  | 0.94585  | 2.88871  |
| F | 0.47252  | -3.22279 | -0.5273  |
| F | -0.83857 | -3.74356 | 1.16417  |
| F | 1.30633  | -4.3925  | 1.15607  |
| S | 1.57442  | 3.18323  | 0.20388  |
| C | -2.81603 | -1.80002 | -2.27469 |
| C | -2.57335 | -2.95962 | -1.64222 |
| O | -2.1133  | 0.34109  | -2.82656 |
| O | -0.5889  | -1.12426 | -1.94505 |
| N | -1.77799 | -0.81717 | -2.35668 |
| C | -3.54133 | -4.02215 | -1.41018 |
| C | -3.23456 | -4.99275 | -0.43209 |
| C | -4.77361 | -4.10166 | -2.09122 |
| C | -4.14544 | -6.00625 | -0.13733 |
| H | -2.29943 | -4.91289 | 0.10721  |
| C | -5.67544 | -5.11936 | -1.79678 |
| H | -5.01574 | -3.37817 | -2.86057 |
| C | -5.3653  | -6.07311 | -0.81908 |
| H | -3.90124 | -6.74766 | 0.61414  |
| H | -6.61848 | -5.1735  | -2.32634 |
| H | -6.0688  | -6.86652 | -0.59659 |
| H | -3.74619 | -1.45817 | -2.69808 |
| H | -1.57702 | -3.09587 | -1.23432 |
| C | -4.49394 | -1.72797 | 1.23387  |
| C | -5.49432 | -2.78527 | 1.39645  |
| C | -6.71748 | -2.50747 | 0.64187  |
| H | -5.06212 | -3.73389 | 1.04578  |
| H | -5.73575 | -2.89345 | 2.46256  |
| N | -3.69159 | -0.89861 | 1.10024  |
| N | -7.6895  | -2.29838 | 0.03995  |

Product

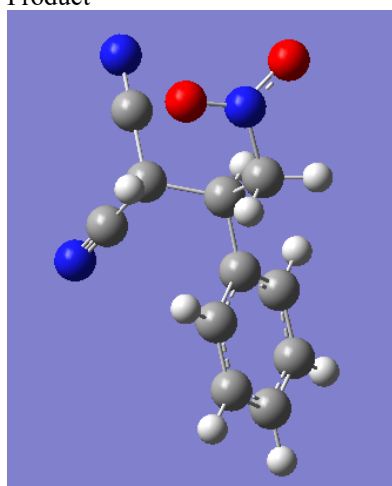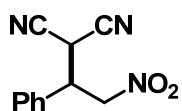

Symbolic Z-matrix:

Charge = 0 Multiplicity = 1

|   |         |          |          |
|---|---------|----------|----------|
| C | 0.92876 | -1.48238 | 0.15965  |
| C | 0.29832 | -0.17991 | -0.38953 |
| O | 3.10281 | -2.08394 | -0.63948 |
| O | 2.92331 | -0.69186 | 1.1698   |
| N | 2.4433  | -1.42595 | 0.2258   |
| C | -1.2106 | -0.31004 | -0.21308 |



|   |          |          |          |
|---|----------|----------|----------|
| C | -1.78629 | -0.35541 | 1.06516  |
| C | -2.03718 | -0.41021 | -1.33773 |
| C | -3.16586 | -0.49491 | 1.21261  |
| H | -1.16282 | -0.27017 | 1.94964  |
| C | -3.41824 | -0.55446 | -1.19003 |
| H | -1.60095 | -0.36901 | -2.32994 |
| C | -3.98455 | -0.59709 | 0.08469  |
| H | -3.60147 | -0.51987 | 2.20427  |
| H | -4.04829 | -0.62779 | -2.06832 |
| H | -5.05635 | -0.70456 | 0.20037  |
| H | 0.68809  | -2.32664 | -0.4827  |
| C | -0.07481 | 2.21608  | 0.28713  |
| C | 0.88608  | 1.10883  | 0.32478  |
| N | -0.82029 | 3.10821  | 0.26287  |
| H | 0.60867  | -1.65735 | 1.18606  |
| C | 2.12387  | 1.53892  | -0.33815 |
| N | 3.08424  | 1.89423  | -0.88934 |
| H | 1.1305   | 0.86159  | 1.36502  |
| H | 0.52589  | -0.09174 | -1.45539 |

**Fig. 5b TS1**

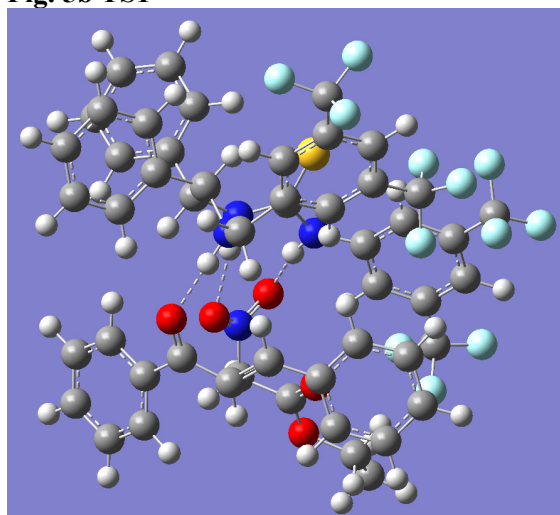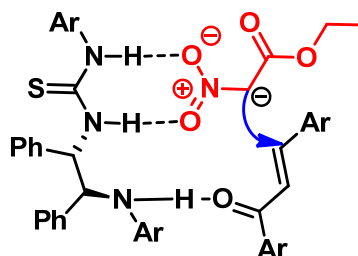

Symbolic Z-matrix:

Charge = 0 Multiplicity = 1

|   |          |          |          |
|---|----------|----------|----------|
| C | 3.00232  | -4.34079 | 0.15317  |
| C | 1.75299  | -3.95649 | 0.64098  |
| C | 1.10573  | -4.76558 | 1.57965  |
| C | 1.68876  | -5.95439 | 2.00135  |
| C | 2.92753  | -6.33974 | 1.49932  |
| C | 3.5846   | -5.52932 | 0.58024  |
| H | 3.52903  | -3.70456 | -0.56991 |
| H | 0.13269  | -4.4521  | 1.99418  |
| H | 1.17067  | -6.58734 | 2.72936  |
| H | 3.38489  | -7.27805 | 1.82933  |
| H | 4.56375  | -5.82555 | 0.19003  |
| C | 0.89016  | -3.65128 | -2.15062 |
| C | 1.78927  | -3.90837 | -3.19171 |
| C | 1.63043  | -5.02856 | -3.99701 |
| C | 0.57369  | -5.90522 | -3.77158 |
| C | -0.32288 | -5.65405 | -2.74013 |
| C | -0.16853 | -4.53178 | -1.93206 |
| H | 2.63255  | -3.22844 | -3.37358 |
| H | 2.33936  | -5.2225  | -4.80823 |

|   |          |          |          |
|---|----------|----------|----------|
| H | 0.44993  | -6.78904 | -4.40565 |
| H | -1.15891 | -6.33806 | -2.55943 |
| H | -0.89673 | -4.3154  | -1.12873 |
| C | 1.09328  | -2.66495 | 0.22675  |
| C | 1.11414  | -2.42167 | -1.30609 |
| N | 0.20093  | -1.31624 | -1.74592 |
| N | 1.75106  | -1.48787 | 0.88012  |
| H | 2.13586  | -2.02007 | -1.5861  |
| H | 0.01336  | -2.68133 | 0.56531  |
| H | 0.72484  | -0.49793 | -2.02613 |
| C | -1.15646 | -1.16698 | -1.4819  |
| C | -4.02789 | -0.29027 | -1.35245 |
| C | -5.32495 | 0.20282  | -1.31598 |
| C | -5.66434 | 1.40033  | -1.94317 |
| C | -4.67305 | 2.10457  | -2.61991 |
| C | -3.36245 | 1.63557  | -2.67498 |
| C | -3.03936 | 0.43241  | -2.03526 |
| H | -3.66603 | -1.27566 | -0.84633 |
| H | -6.69314 | 1.7815   | -1.90387 |
| H | -2.60837 | 2.22291  | -3.2184  |
| N | -1.68193 | -0.03641 | -2.12849 |
| H | -1.05037 | 0.64764  | -2.52465 |
| F | -4.74905 | 3.38528  | -4.6636  |
| F | -4.23203 | 4.46218  | -2.89268 |
| F | -6.25492 | 3.86155  | -3.22458 |
| F | -6.27201 | -0.46556 | 0.79994  |
| F | -7.66142 | -0.25611 | -0.80857 |
| F | -6.33836 | -1.92784 | -0.7634  |
| C | -4.98144 | 3.42174  | -3.32977 |
| C | -6.37744 | -0.59465 | -0.54309 |
| C | 1.64244  | -1.43943 | 2.36035  |
| C | 0.27161  | -1.03917 | 2.81667  |
| C | -0.04959 | 0.30905  | 2.9661   |
| C | -0.67453 | -2.02041 | 3.12468  |
| C | -1.31277 | 0.67241  | 3.43123  |
| H | 0.6992   | 1.08303  | 2.72181  |
| C | -1.92515 | -1.6435  | 3.60418  |
| H | -0.42156 | -3.08664 | 2.96933  |
| C | -2.25725 | -0.29793 | 3.75404  |
| H | -3.25355 | -0.01655 | 4.12077  |
| H | 1.92577  | -2.40686 | 2.8314   |
| H | 2.39023  | -0.68412 | 2.70029  |
| C | -2.96702 | -2.69165 | 3.99954  |
| C | -1.67    | 2.15204  | 3.56741  |
| F | -3.18077 | -2.74644 | 5.33635  |
| F | -4.1931  | -2.47879 | 3.47221  |
| F | -2.66597 | -3.96475 | 3.65889  |
| F | -2.193   | 2.69118  | 2.44221  |
| F | -0.62181 | 2.95716  | 3.8663   |
| F | -2.57867 | 2.43015  | 4.52975  |
| S | -2.10447 | -2.24213 | -0.57836 |
| O | 1.76512  | 1.08268  | -2.2978  |
| O | 0.05523  | 2.11478  | -2.97103 |
| N | 1.20304  | 2.1265   | -2.56805 |
| C | 1.9423   | 3.44831  | -2.42216 |
| H | 3.04397  | 3.29113  | -2.47701 |
| H | 1.69095  | 4.12605  | -3.26983 |
| C | 1.60898  | 4.14145  | -1.10982 |
| C | 1.95117  | 6.1344   | 0.16859  |

|   |         |          |          |
|---|---------|----------|----------|
| H | 0.86398 | 6.30208  | 0.28582  |
| H | 2.30955 | 5.57242  | 1.05736  |
| C | 2.70601 | 7.43428  | -0.01982 |
| H | 2.35773 | 7.99457  | -0.89762 |
| H | 2.56279 | 8.07473  | 0.86014  |
| H | 3.7856  | 7.2734   | -0.13989 |
| O | 2.18777 | 5.36304  | -1.02014 |
| O | 0.91811 | 3.68839  | -0.22107 |
| O | 4.6086  | -1.30803 | 0.6367   |
| C | 4.97535 | -0.31029 | 0.03251  |
| C | 4.91795 | 1.04265  | 0.62849  |
| C | 5.45869 | -0.40758 | -1.3748  |
| H | 5.5298  | 1.81586  | 0.14602  |
| C | 4.13492 | 1.31673  | 1.68056  |
| C | 4.70385 | -1.13103 | -2.3002  |
| C | 6.65603 | 0.18936  | -1.76853 |
| H | 3.51417 | 0.52563  | 2.14653  |
| C | 3.99419 | 2.64813  | 2.26168  |
| C | 5.14082 | -1.2471  | -3.6145  |
| H | 3.76189 | -1.61324 | -1.98478 |
| C | 7.09133 | 0.06491  | -3.08349 |
| H | 7.26026 | 0.74409  | -1.04135 |
| C | 2.75809 | 3.00962  | 2.80961  |
| C | 5.05273 | 3.55937  | 2.28836  |
| C | 6.3345  | -0.6498  | -4.00681 |
| H | 4.54462 | -1.81878 | -4.33507 |
| H | 8.03583 | 0.52646  | -3.39059 |
| C | 2.58008 | 4.27513  | 3.35406  |
| H | 1.91843 | 2.2939   | 2.80176  |
| C | 4.87246 | 4.81964  | 2.84717  |
| H | 6.02918 | 3.27739  | 1.8774   |
| H | 6.68182 | -0.74741 | -5.04088 |
| C | 3.6368  | 5.18128  | 3.37366  |
| H | 1.6051  | 4.55119  | 3.77333  |
| H | 5.70758 | 5.52755  | 2.87493  |
| H | 3.49725 | 6.17489  | 3.81266  |
| H | 2.73852 | -1.48886 | 0.65461  |

**Fig. 5b TS2**

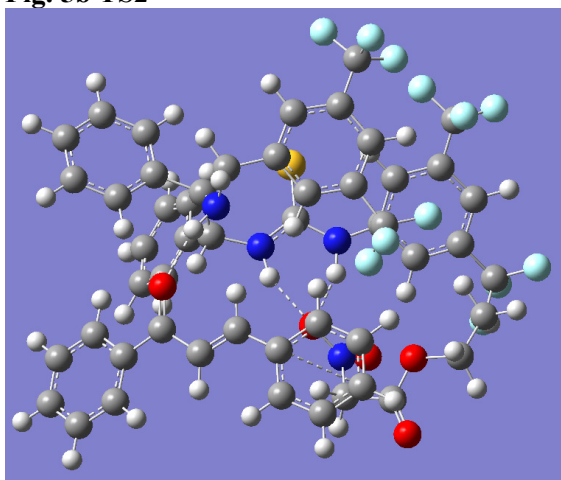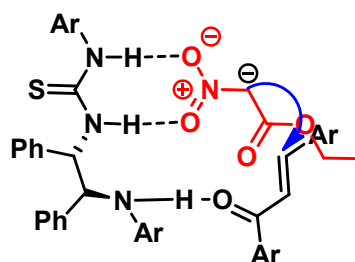

Symbolic Z-matrix:

Charge = 0 Multiplicity = 1

|   |          |         |          |
|---|----------|---------|----------|
| C | -5.38196 | 1.32819 | 0.07226  |
| C | -4.37161 | 2.16783 | -0.42468 |

|   |          |          |          |
|---|----------|----------|----------|
| C | -4.72764 | 3.4304   | -0.91478 |
| C | -6.06377 | 3.84369  | -0.92738 |
| C | -7.06348 | 2.9953   | -0.4455  |
| C | -6.71691 | 1.73708  | 0.05493  |
| H | -5.12319 | 0.35961  | 0.48549  |
| H | -3.9539  | 4.09     | -1.29508 |
| H | -6.32162 | 4.82463  | -1.3108  |
| H | -8.10127 | 3.31218  | -0.45422 |
| H | -7.48781 | 1.07624  | 0.43841  |
| C | -3.31797 | 0.77014  | -2.80053 |
| C | -4.07497 | -0.28875 | -3.3238  |
| C | -4.68546 | -0.19065 | -4.57542 |
| C | -4.54953 | 0.97942  | -5.32481 |
| C | -3.80027 | 2.04036  | -4.81267 |
| C | -3.18812 | 1.93891  | -3.56246 |
| H | -4.18472 | -1.20144 | -2.74575 |
| H | -5.26573 | -1.02125 | -4.96178 |
| H | -5.02238 | 1.06389  | -6.29671 |
| H | -3.68638 | 2.9515   | -5.38905 |
| H | -2.58212 | 2.75121  | -3.18966 |
| C | -2.90247 | 1.73043  | -0.3895  |
| C | -2.66709 | 0.57976  | -1.42785 |
| N | -1.25643 | 0.09785  | -1.58913 |
| N | -2.50124 | 1.21333  | 0.94155  |
| H | -3.1586  | -0.28132 | -0.9561  |
| H | -2.2673  | 2.58531  | -0.63087 |
| H | -1.1278  | -0.86048 | -1.26576 |
| C | -0.11489 | 0.74937  | -1.92127 |
| C | 3.01225  | 1.33871  | -2.01381 |
| C | 4.40098  | 1.39442  | -2.15067 |
| C | 5.16336  | 0.26053  | -2.41132 |
| C | 4.5014   | -0.96084 | -2.50756 |
| C | 3.12574  | -1.0526  | -2.33081 |
| C | 2.35061  | 0.09954  | -2.07845 |
| H | 2.44567  | 2.24518  | -1.86624 |
| H | 6.23648  | 0.32479  | -2.53551 |
| H | 2.64601  | -2.02553 | -2.36331 |
| N | 0.97613  | -0.11269 | -1.8664  |
| H | 0.73505  | -1.07479 | -1.61676 |
| F | 5.28219  | -2.39703 | -4.25957 |
| F | 4.71409  | -3.32331 | -2.34634 |
| F | 6.58579  | -2.08794 | -2.50022 |
| F | 5.35865  | 2.96273  | -0.60859 |
| F | 6.31071  | 2.72395  | -2.59106 |
| F | 4.32609  | 3.74868  | -2.39926 |
| C | 5.27273  | -2.1729  | -2.90057 |
| C | 5.08971  | 2.70307  | -1.95272 |
| C | -2.4469  | 2.21434  | 2.02925  |
| C | -1.08071 | 2.88277  | 2.14295  |
| C | 0.05607  | 2.07789  | 2.23198  |
| C | -0.92276 | 4.27257  | 2.14993  |
| C | 1.32109  | 2.65403  | 2.39042  |
| H | -0.06545 | 1.00104  | 2.12699  |
| C | 0.35689  | 4.83873  | 2.24406  |
| H | -1.78636 | 4.92508  | 2.05247  |
| C | 1.49395  | 4.04114  | 2.36842  |
| H | 2.49022  | 4.47551  | 2.37045  |
| H | -3.23305 | 2.98476  | 1.96163  |
| H | -2.61985 | 1.63863  | 2.95281  |

|   |          |          |          |
|---|----------|----------|----------|
| C | 0.5069   | 6.32537  | 2.27945  |
| C | 2.46242  | 1.75568  | 2.68783  |
| F | 0.48053  | 6.82882  | 3.57091  |
| F | 1.71207  | 6.71528  | 1.72746  |
| F | -0.52442 | 6.93842  | 1.60111  |
| F | 2.43082  | 0.62191  | 1.89393  |
| F | 2.37068  | 1.26894  | 3.99988  |
| F | 3.68698  | 2.36339  | 2.56408  |
| S | -0.00991 | 2.4012   | -2.44306 |
| O | -0.27318 | -2.55237 | -0.61696 |
| O | 1.21194  | -3.69505 | -1.92581 |
| N | 0.39328  | -3.60514 | -0.95807 |
| C | 0.15134  | -4.8295  | -0.11828 |
| H | -0.23901 | -5.61646 | -0.76683 |
| O | -3.81371 | -1.2483  | 1.43888  |
| C | -3.55796 | -2.4759  | 1.51953  |
| C | -2.4082  | -2.98518 | 2.27991  |
| C | -4.41014 | -3.45457 | 0.77776  |
| H | -2.25065 | -4.04584 | 2.23008  |
| C | -1.58699 | -2.15944 | 2.96114  |
| C | -5.22917 | -2.9465  | -0.24676 |
| C | -4.44742 | -4.82812 | 1.06286  |
| H | -1.87423 | -1.10321 | 2.95883  |
| C | -0.35926 | -2.46625 | 3.70858  |
| C | -6.04785 | -3.79437 | -0.98531 |
| H | -5.19538 | -1.88233 | -0.44572 |
| C | -5.27885 | -5.67581 | 0.33045  |
| H | -3.85756 | -5.23944 | 1.87275  |
| C | 0.57537  | -1.43767 | 3.97722  |
| C | -0.07692 | -3.76532 | 4.18386  |
| C | -6.07394 | -5.16333 | -0.69763 |
| H | -6.66994 | -3.3933  | -1.77645 |
| H | -5.31261 | -6.73282 | 0.56623  |
| C | 1.76342  | -1.70487 | 4.65559  |
| H | 0.39985  | -0.41569 | 3.66548  |
| C | 1.09986  | -4.02483 | 4.88357  |
| H | -0.80116 | -4.561   | 4.03723  |
| H | -6.71533 | -5.8257  | -1.26692 |
| C | 2.02679  | -2.99763 | 5.11535  |
| H | 2.46922  | -0.89452 | 4.79653  |
| H | 1.29349  | -5.02417 | 5.25772  |
| H | 2.93926  | -3.20372 | 5.66494  |
| H | -3.0615  | 0.40009  | 1.21175  |
| C | 1.44691  | -5.34712 | 0.5215   |
| C | 3.68873  | -4.78935 | 1.27069  |
| H | 3.92068  | -5.81436 | 0.94186  |
| H | 3.5144   | -4.77314 | 2.34924  |
| C | 4.72168  | -3.76262 | 0.80812  |
| H | 4.35135  | -2.75528 | 1.02739  |
| H | 5.68245  | -3.92574 | 1.32266  |
| H | 4.87432  | -3.85245 | -0.27087 |
| O | 2.3819   | -4.37487 | 0.62726  |
| O | 1.56942  | -6.51208 | 0.88345  |
| H | -0.58574 | -4.52475 | 0.60267  |

**1m Cat.+4H<sub>2</sub>O(Gas)**

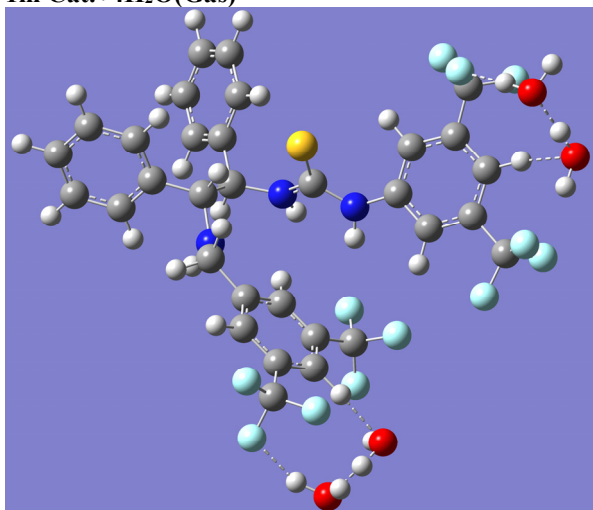

Symbolic Z-matrix:

Charge = 0 Multiplicity = 1

|   |          |          |          |
|---|----------|----------|----------|
| C | -6.15847 | 0.1223   | 0.61868  |
| C | -5.12785 | 1.04631  | 0.82019  |
| C | -5.4408  | 2.28539  | 1.3989   |
| C | -6.75243 | 2.59439  | 1.75618  |
| C | -7.77634 | 1.66811  | 1.54011  |
| C | -7.47529 | 0.43034  | 0.97128  |
| H | -5.94044 | -0.85487 | 0.20343  |
| H | -4.65126 | 3.01019  | 1.55897  |
| H | -6.97562 | 3.55616  | 2.2033   |
| H | -8.79618 | 1.90682  | 1.81863  |
| H | -8.26097 | -0.29897 | 0.80901  |
| C | -3.8534  | 2.75274  | -1.2793  |
| C | -5.09418 | 2.79901  | -1.9316  |
| C | -5.6722  | 4.01799  | -2.28504 |
| C | -5.01056 | 5.21345  | -1.99765 |
| C | -3.77282 | 5.17659  | -1.35317 |
| C | -3.19509 | 3.95589  | -0.9967  |
| H | -5.61778 | 1.87501  | -2.15246 |
| H | -6.63343 | 4.0332   | -2.78554 |
| H | -5.45441 | 6.1627   | -2.27458 |
| H | -3.25197 | 6.09947  | -1.12486 |
| H | -2.24911 | 3.93434  | -0.47583 |
| C | -3.67493 | 0.741    | 0.44533  |
| C | -3.27124 | 1.37896  | -0.94265 |
| N | -1.7918  | 1.29263  | -1.16975 |
| N | -3.33747 | -0.68198 | 0.34062  |
| H | -3.67843 | 0.68606  | -1.68814 |
| H | -3.02497 | 1.1781   | 1.20299  |
| H | -3.9643  | -1.23332 | -0.24436 |
| H | -1.55274 | 0.96464  | -2.10521 |
| C | -0.73317 | 1.59805  | -0.37085 |
| C | 2.14433  | 2.76265  | -0.09098 |
| C | 3.48335  | 3.04387  | 0.16167  |
| C | 4.49728  | 2.11649  | -0.0599  |
| C | 4.11889  | 0.86195  | -0.52748 |
| C | 2.78753  | 0.54134  | -0.77068 |
| C | 1.78328  | 1.49573  | -0.56243 |
| H | 1.39658  | 3.51743  | 0.08563  |
| H | 5.55921  | 2.34872  | 0.13517  |

|   |          |          |          |
|---|----------|----------|----------|
| H | 2.53943  | -0.45619 | -1.10542 |
| N | 0.45651  | 1.14163  | -0.91038 |
| H | 0.39208  | 0.3702   | -1.57759 |
| F | 6.0566   | -0.25754 | 0.27581  |
| F | 5.93672  | 0.14008  | -1.89121 |
| F | 4.62743  | -1.40485 | -0.98959 |
| F | 2.88543  | 5.31518  | 0.51056  |
| F | 3.95817  | 4.28535  | 2.15084  |
| F | 5.05517  | 4.81522  | 0.31588  |
| C | 5.17292  | -0.15985 | -0.79194 |
| C | 3.8359   | 4.36044  | 0.74463  |
| C | -2.79576 | -1.41525 | 1.48984  |
| C | -1.7407  | -2.41041 | 1.00665  |
| C | -1.02022 | -2.08802 | -0.14129 |
| C | -1.47483 | -3.6169  | 1.64711  |
| C | -0.03716 | -2.93638 | -0.62339 |
| H | -1.28467 | -1.17234 | -0.64699 |
| C | -0.50055 | -4.48127 | 1.13319  |
| H | -2.02333 | -3.90638 | 2.5359   |
| C | 0.241    | -4.15894 | -0.00005 |
| H | 0.97644  | -4.85581 | -0.43299 |
| H | -2.31107 | -0.68179 | 2.14508  |
| H | -3.55695 | -1.94169 | 2.087    |
| C | -0.37638 | -5.83145 | 1.73815  |
| C | 0.71916  | -2.52641 | -1.83429 |
| F | -1.22569 | -6.77891 | 1.11524  |
| F | 0.87605  | -6.36392 | 1.61924  |
| F | -0.76002 | -5.82958 | 3.05186  |
| F | 0.21464  | -1.33796 | -2.36381 |
| F | 0.6678   | -3.46136 | -2.85152 |
| F | 2.0552   | -2.30822 | -1.58662 |
| S | -0.81969 | 2.42234  | 1.15682  |
| O | 6.54359  | 3.58607  | 2.92584  |
| H | 7.03901  | 4.44687  | 2.92264  |
| H | 5.59206  | 3.81656  | 2.73501  |
| O | 7.2952   | 2.34508  | 0.70015  |
| H | 7.2414   | 1.36055  | 0.82378  |
| H | 7.08904  | 2.76041  | 1.61146  |
| O | 1.88017  | -6.42247 | -1.85523 |
| H | 1.06777  | -7.021   | -1.69566 |
| H | 1.64155  | -5.84255 | -2.62504 |
| O | -0.12461 | -7.98455 | -1.12751 |
| H | 0.35263  | -8.74241 | -0.69923 |
| H | -0.69325 | -7.5866  | -0.40767 |

# **1m Cat.+4H<sub>2</sub>O(THF)**

Symbolic Z-matrix:

Charge = 0 Multiplicity = 1

|   |          |          |          |
|---|----------|----------|----------|
| C | -6.22502 | 0.4714   | 0.19652  |
| C | -5.32205 | -0.25496 | -0.59332 |
| C | -5.81708 | -0.99026 | -1.67814 |
| C | -7.18368 | -1.00336 | -1.96963 |
| C | -8.07551 | -0.27829 | -1.17521 |
| C | -7.59182 | 0.45905  | -0.08993 |
| H | -5.87009 | 1.05142  | 1.04239  |
| H | -5.12728 | -1.55634 | -2.29464 |
| H | -7.54955 | -1.57541 | -2.8146  |
| H | -9.13584 | -0.28523 | -1.39934 |
| H | -8.27746 | 1.02437  | 0.53089  |

|   |          |          |          |
|---|----------|----------|----------|
| C | -4.17552 | -2.43928 | 1.05951  |
| C | -5.2152  | -2.61213 | 1.98465  |
| C | -5.88293 | -3.83459 | 2.09123  |
| C | -5.51313 | -4.90556 | 1.27417  |
| C | -4.4729  | -4.74381 | 0.35397  |
| C | -3.80819 | -3.52033 | 0.2449   |
| H | -5.50668 | -1.78516 | 2.62323  |
| H | -6.68499 | -3.94944 | 2.81124  |
| H | -6.02738 | -5.85625 | 1.35524  |
| H | -4.17788 | -5.57161 | -0.28101 |
| H | -2.9984  | -3.3963  | -0.46208 |
| C | -3.82035 | -0.23693 | -0.3048  |
| C | -3.48966 | -1.0773  | 0.97554  |
| N | -2.01616 | -1.16272 | 1.24598  |
| N | -3.26265 | 1.11106  | -0.09344 |
| H | -3.86354 | -0.4842  | 1.81688  |
| H | -3.29367 | -0.6854  | -1.14638 |
| H | -3.82951 | 1.692    | 0.52733  |
| H | -1.78867 | -1.03027 | 2.2325   |
| C | -0.96701 | -1.39524 | 0.43119  |
| C | 1.6725   | -2.95612 | 0.1702   |
| C | 2.94454  | -3.42791 | -0.13542 |
| C | 4.08644  | -2.65511 | 0.053    |
| C | 3.911    | -1.36249 | 0.53571  |
| C | 2.65016  | -0.85035 | 0.82809  |
| C | 1.51397  | -1.65223 | 0.65552  |
| H | 0.81564  | -3.59631 | 0.03262  |
| H | 5.0943   | -3.03116 | -0.1717  |
| H | 2.55798  | 0.169    | 1.17239  |
| N | 0.25329  | -1.14204 | 1.03867  |
| H | 0.27551  | -0.43639 | 1.77754  |
| F | 5.92151  | -0.50241 | -0.3963  |
| F | 5.91689  | -0.96027 | 1.76026  |
| F | 4.78187  | 0.79171  | 1.01099  |
| F | 2.01948  | -5.58764 | -0.48863 |
| F | 3.18385  | -4.69079 | -2.14637 |
| F | 4.24378  | -5.40388 | -0.34913 |
| C | 5.11578  | -0.51001 | 0.73732  |
| C | 3.08525  | -4.77223 | -0.7445  |
| C | -2.72181 | 1.86357  | -1.23693 |
| C | -1.51969 | 2.6982   | -0.78863 |
| C | -0.82796 | 2.31278  | 0.36149  |
| C | -1.07649 | 3.81481  | -1.49871 |
| C | 0.304    | 3.007    | 0.76943  |
| H | -1.22102 | 1.47573  | 0.91735  |
| C | 0.05145  | 4.5135   | -1.05857 |
| H | -1.59631 | 4.1478   | -2.38903 |
| C | 0.76733  | 4.11858  | 0.06735  |
| H | 1.6493   | 4.66323  | 0.43309  |
| H | -2.37082 | 1.13155  | -1.97397 |
| H | -3.45649 | 2.51215  | -1.73691 |
| C | 0.454    | 5.75922  | -1.75331 |
| C | 1.04238  | 2.56874  | 1.98082  |
| F | -0.05976 | 6.89888  | -1.10531 |
| F | 1.82083  | 5.94001  | -1.74598 |
| F | 0.00046  | 5.8219   | -3.04006 |
| F | 0.45357  | 1.45805  | 2.57284  |
| F | 1.12272  | 3.54781  | 2.9507   |
| F | 2.35295  | 2.21629  | 1.70089  |



|   |          |          |          |
|---|----------|----------|----------|
| S | -1.05084 | -1.91315 | -1.23856 |
| O | 5.92705  | -4.8684  | -2.6137  |
| H | 6.00029  | -5.72547 | -2.11482 |
| H | 4.94684  | -4.70559 | -2.68307 |
| O | 6.86372  | -3.24424 | -0.75321 |
| H | 6.81683  | -2.29538 | -1.04399 |
| H | 6.56467  | -3.8101  | -1.55575 |
| O | 2.87309  | 5.5153   | 1.56452  |
| H | 2.57087  | 6.44093  | 1.23669  |
| H | 2.29786  | 5.29184  | 2.34371  |
| O | 2.1      | 7.76671  | 0.43047  |
| H | 2.69715  | 7.75412  | -0.36457 |
| H | 1.18937  | 7.61594  | 0.05633  |

# **1m Cat.+4H<sub>2</sub>O(EtOH)**

Symbolic Z-matrix:

|                             |          |          |          |
|-----------------------------|----------|----------|----------|
| Charge = 0 Multiplicity = 1 |          |          |          |
| C                           | 6.21609  | 0.80515  | -0.11373 |
| C                           | 5.42501  | -0.01035 | 0.71019  |
| C                           | 6.04709  | -0.73953 | 1.73     |
| C                           | 7.42665  | -0.6538  | 1.92839  |
| C                           | 8.20402  | 0.16456  | 1.10707  |
| C                           | 7.59463  | 0.89407  | 0.08319  |
| H                           | 5.75935  | 1.37222  | -0.91984 |
| H                           | 5.44811  | -1.38181 | 2.36569  |
| H                           | 7.89257  | -1.22569 | 2.72244  |
| H                           | 9.27458  | 0.23239  | 1.26071  |
| H                           | 8.19237  | 1.52835  | -0.56146 |
| C                           | 4.29944  | -2.10969 | -1.07352 |
| C                           | 5.32576  | -2.16236 | -2.02664 |
| C                           | 6.01815  | -3.34977 | -2.26867 |
| C                           | 5.68728  | -4.50599 | -1.56038 |
| C                           | 4.6626   | -4.46395 | -0.61178 |
| C                           | 3.97226  | -3.27604 | -0.36704 |
| H                           | 5.59239  | -1.26614 | -2.57693 |
| H                           | 6.81085  | -3.37087 | -3.0076  |
| H                           | 6.22119  | -5.43068 | -1.74658 |
| H                           | 4.39781  | -5.35855 | -0.0597  |
| H                           | 3.17279  | -3.24632 | 0.36168  |
| C                           | 3.91276  | -0.08008 | 0.52137  |
| C                           | 3.57745  | -0.78486 | -0.83989 |
| N                           | 2.10694  | -0.88542 | -1.11762 |
| N                           | 3.30099  | 1.27222  | 0.51592  |
| H                           | 3.9282   | -0.08636 | -1.6071  |
| H                           | 3.47244  | -0.66825 | 1.32536  |
| H                           | 3.97578  | 2.00321  | 0.28884  |
| H                           | 1.87947  | -0.72014 | -2.09867 |
| C                           | 1.06593  | -1.27795 | -0.33612 |
| C                           | -1.55183 | -2.90659 | -0.03883 |
| C                           | -2.82512 | -3.4054  | 0.21854  |
| C                           | -3.98126 | -2.69851 | -0.09832 |
| C                           | -3.82019 | -1.43855 | -0.66704 |
| C                           | -2.56203 | -0.9005  | -0.91767 |
| C                           | -1.41027 | -1.63926 | -0.61353 |
| H                           | -0.68449 | -3.49415 | 0.21383  |
| H                           | -4.99385 | -3.09878 | 0.08308  |
| H                           | -2.48672 | 0.09417  | -1.33375 |
| N                           | -0.15348 | -1.09241 | -0.96502 |
| H                           | -0.18853 | -0.37959 | -1.69588 |

|   |          |          |          |
|---|----------|----------|----------|
| F | -5.92929 | -0.604   | 0.04354  |
| F | -5.72628 | -1.18095 | -2.07719 |
| F | -4.71482 | 0.6488   | -1.33933 |
| F | -1.82628 | -5.47613 | 0.81846  |
| F | -3.16392 | -4.51996 | 2.30331  |
| F | -4.03685 | -5.4347  | 0.49649  |
| C | -5.03502 | -0.64719 | -1.02026 |
| C | -2.94677 | -4.70223 | 0.92508  |
| C | 2.38185  | 1.67234  | 1.59836  |
| C | 1.23455  | 2.50732  | 1.0292   |
| C | 0.7828   | 2.20559  | -0.25735 |
| C | 0.59292  | 3.51643  | 1.74456  |
| C | -0.32085 | 2.85616  | -0.78986 |
| H | 1.32888  | 1.45814  | -0.81022 |
| C | -0.48875 | 4.19552  | 1.17112  |
| H | 0.91804  | 3.78274  | 2.74322  |
| C | -0.97647 | 3.86981  | -0.08983 |
| H | -1.82017 | 4.39244  | -0.57257 |
| H | 1.94617  | 0.75452  | 2.01123  |
| H | 2.87192  | 2.21771  | 2.41951  |
| C | -1.08502 | 5.3444   | 1.89094  |
| C | -0.82662 | 2.46742  | -2.1311  |
| F | -0.5649  | 6.57014  | 1.4266   |
| F | -2.44545 | 5.44781  | 1.68461  |
| F | -0.83838 | 5.31807  | 3.23392  |
| F | -0.10209 | 1.3859   | -2.65021 |
| F | -0.74765 | 3.47713  | -3.06591 |
| F | -2.14725 | 2.07236  | -2.10796 |
| S | 1.19192  | -1.88709 | 1.28764  |
| O | -5.92694 | -4.8147  | 2.53941  |
| H | -5.82728 | -5.58621 | 1.91897  |
| H | -4.98671 | -4.54533 | 2.72801  |
| O | -6.75404 | -3.34208 | 0.50769  |
| H | -6.8564  | -2.36888 | 0.67592  |
| H | -6.56681 | -3.7916  | 1.40451  |
| O | -2.82678 | 5.22598  | -1.83724 |
| H | -2.69115 | 6.16046  | -1.4435  |
| H | -2.18119 | 5.12226  | -2.58535 |
| O | -2.51362 | 7.40348  | -0.38919 |
| H | -3.2131  | 7.13523  | 0.26493  |
| H | -1.66107 | 7.29957  | 0.11497  |

# **1m Cat.+4H<sub>2</sub>O(MeOH)**

Symbolic Z-matrix:

Charge = 0 Multiplicity = 1

|   |         |          |          |
|---|---------|----------|----------|
| C | 6.20482 | 0.75372  | -0.18493 |
| C | 5.39034 | -0.01764 | 0.65855  |
| C | 5.9852  | -0.70148 | 1.72559  |
| C | 7.36123 | -0.61558 | 1.95043  |
| C | 8.16235 | 0.15746  | 1.1077   |
| C | 7.57992 | 0.8418   | 0.03719  |
| H | 5.77139 | 1.28719  | -1.02601 |
| H | 5.36802 | -1.30763 | 2.37935  |
| H | 7.80527 | -1.15147 | 2.78135  |
| H | 9.22994 | 0.22563  | 1.28098  |
| H | 8.19595 | 1.44106  | -0.62353 |
| C | 4.28094 | -2.18417 | -1.05694 |
| C | 5.31126 | -2.28032 | -2.00272 |
| C | 6.00679 | -3.47718 | -2.18508 |

|   |          |          |          |
|---|----------|----------|----------|
| C | 5.67523  | -4.59945 | -1.4236  |
| C | 4.64588  | -4.51426 | -0.48221 |
| C | 3.95286  | -3.31666 | -0.29744 |
| H | 5.57697  | -1.41164 | -2.59582 |
| H | 6.8024   | -3.53185 | -2.91922 |
| H | 6.21181  | -5.53084 | -1.56308 |
| H | 4.38051  | -5.38208 | 0.11094  |
| H | 3.15023  | -3.25334 | 0.42571  |
| C | 3.88054  | -0.08709 | 0.44321  |
| C | 3.55761  | -0.84984 | -0.88792 |
| N | 2.08802  | -0.96467 | -1.1663  |
| N | 3.26138  | 1.25683  | 0.36736  |
| H | 3.9114   | -0.18933 | -1.6865  |
| H | 3.42257  | -0.63402 | 1.26594  |
| H | 3.90479  | 1.96572  | 0.012    |
| H | 1.86345  | -0.83388 | -2.15364 |
| C | 1.04474  | -1.30474 | -0.37092 |
| C | -1.54618 | -2.96244 | -0.09916 |
| C | -2.80936 | -3.48005 | 0.16574  |
| C | -3.97688 | -2.77717 | -0.11747 |
| C | -3.83778 | -1.5029  | -0.65846 |
| C | -2.58828 | -0.94511 | -0.91376 |
| C | -1.4252  | -1.67864 | -0.64315 |
| H | -0.66907 | -3.5502  | 0.11825  |
| H | -4.97394 | -3.19921 | 0.08613  |
| H | -2.52789 | 0.06028  | -1.30485 |
| N | -0.17663 | -1.11861 | -0.99867 |
| H | -0.216   | -0.41069 | -1.73424 |
| F | -5.97732 | -0.74775 | 0.05678  |
| F | -5.73084 | -1.22544 | -2.08244 |
| F | -4.77311 | 0.59205  | -1.25142 |
| F | -1.80048 | -5.5753  | 0.6455   |
| F | -3.07504 | -4.6806  | 2.21796  |
| F | -4.02154 | -5.50357 | 0.40584  |
| C | -5.06383 | -0.72318 | -0.99131 |
| C | -2.9175  | -4.80578 | 0.82037  |
| C | 2.44674  | 1.75381  | 1.49211  |
| C | 1.27499  | 2.57881  | 0.95893  |
| C | 0.74471  | 2.23901  | -0.28754 |
| C | 0.69246  | 3.62458  | 1.67335  |
| C | -0.37423 | 2.8948   | -0.78182 |
| H | 1.24828  | 1.46437  | -0.84381 |
| C | -0.41052 | 4.3006   | 1.13979  |
| H | 1.08238  | 3.92148  | 2.63966  |
| C | -0.97366 | 3.94118  | -0.08012 |
| H | -1.83677 | 4.46253  | -0.52374 |
| H | 2.02915  | 0.87765  | 2.00215  |
| H | 3.01301  | 2.3408   | 2.23082  |
| C | -0.94553 | 5.48627  | 1.84851  |
| C | -0.95303 | 2.47971  | -2.0846  |
| F | -0.40817 | 6.6815   | 1.32637  |
| F | -2.30794 | 5.62256  | 1.69149  |
| F | -0.64437 | 5.4927   | 3.1805   |
| F | -0.25529 | 1.40108  | -2.63222 |
| F | -0.94097 | 3.48137  | -3.03356 |
| F | -2.27025 | 2.07828  | -1.97856 |
| S | 1.15484  | -1.86162 | 1.27668  |
| O | -5.74091 | -4.32925 | 2.97805  |
| H | -6.1004  | -5.23615 | 3.16268  |

|   |          |          |          |
|---|----------|----------|----------|
| H | -4.76794 | -4.4475  | 2.7957   |
| O | -6.71237 | -3.50604 | 0.65496  |
| H | -6.82    | -2.51881 | 0.69587  |
| H | -6.41363 | -3.79266 | 1.59289  |
| O | -2.92657 | 5.2954   | -1.75727 |
| H | -2.70448 | 6.22663  | -1.39188 |
| H | -2.30089 | 5.1249   | -2.51039 |
| O | -2.38602 | 7.52147  | -0.44865 |
| H | -3.08207 | 7.39687  | 0.25052  |
| H | -1.52633 | 7.38438  | 0.03524  |

# 1m Cat.+4H<sub>2</sub>O(Water)

Symbolic Z-matrix:

Charge = 0 Multiplicity = 1

|   |          |          |          |
|---|----------|----------|----------|
| C | -6.18768 | 0.80776  | 0.18772  |
| C | -5.31506 | 0.03574  | -0.59271 |
| C | -5.83959 | -0.69395 | -1.66722 |
| C | -7.20603 | -0.65637 | -1.95828 |
| C | -8.06779 | 0.11373  | -1.17311 |
| C | -7.55426 | 0.84558  | -0.09765 |
| H | -5.80962 | 1.38416  | 1.02613  |
| H | -5.17465 | -1.29581 | -2.2773  |
| H | -7.59482 | -1.22403 | -2.79595 |
| H | -9.12767 | 0.14621  | -1.39706 |
| H | -8.21643 | 1.44571  | 0.51589  |
| C | -4.30557 | -2.22108 | 1.02569  |
| C | -5.39974 | -2.32611 | 1.8968   |
| C | -6.14084 | -3.50764 | 1.97628  |
| C | -5.79053 | -4.60626 | 1.18752  |
| C | -4.69653 | -4.51247 | 0.3219   |
| C | -3.9587  | -3.32929 | 0.23946  |
| H | -5.67562 | -1.47855 | 2.51473  |
| H | -6.98365 | -3.57011 | 2.655    |
| H | -6.36104 | -5.5258  | 1.24891  |
| H | -4.41605 | -5.36191 | -0.29069 |
| H | -3.11029 | -3.25572 | -0.42822 |
| C | -3.81597 | -0.01427 | -0.2917  |
| C | -3.54018 | -0.90022 | 0.97132  |
| N | -2.07548 | -1.07204 | 1.24675  |
| N | -3.19849 | 1.29771  | -0.03481 |
| H | -3.88624 | -0.30293 | 1.82122  |
| H | -3.29673 | -0.46307 | -1.13803 |
| H | -3.71815 | 1.87066  | 0.63305  |
| H | -1.84584 | -0.96608 | 2.23607  |
| C | -1.03525 | -1.33889 | 0.43253  |
| C | 1.49812  | -3.05951 | 0.20667  |
| C | 2.73696  | -3.61482 | -0.09257 |
| C | 3.92692  | -2.9117  | 0.08097  |
| C | 3.83374  | -1.60539 | 0.55047  |
| C | 2.60717  | -1.012   | 0.83749  |
| C | 1.42211  | -1.74045 | 0.67076  |
| H | 0.60299  | -3.64864 | 0.0845   |
| H | 4.9037   | -3.35663 | -0.1579  |
| H | 2.58023  | 0.01348  | 1.17437  |
| N | 0.19481  | -1.14842 | 1.04396  |
| H | 0.25653  | -0.44015 | 1.77821  |
| F | 5.92637  | -0.89868 | -0.33843 |
| F | 5.82743  | -1.31296 | 1.82414  |
| F | 4.83501  | 0.49535  | 1.00971  |

|   |          |          |          |
|---|----------|----------|----------|
| F | 1.68265  | -5.72619 | -0.3564  |
| F | 2.87476  | -4.96972 | -2.0589  |
| F | 3.91351  | -5.66448 | -0.24035 |
| C | 5.08672  | -0.83079 | 0.77044  |
| C | 2.79565  | -4.98801 | -0.65185 |
| C | -2.6668  | 2.08057  | -1.16146 |
| C | -1.39585 | 2.81962  | -0.73358 |
| C | -0.71572 | 2.38453  | 0.40522  |
| C | -0.882   | 3.89879  | -1.45454 |
| C | 0.47041  | 2.99483  | 0.79407  |
| H | -1.1591  | 1.57613  | 0.96593  |
| C | 0.30303  | 4.51032  | -1.03645 |
| H | -1.38994 | 4.26807  | -2.33738 |
| C | 1.00457  | 4.06613  | 0.08045  |
| H | 1.9304   | 4.54329  | 0.43055  |
| H | -2.39896 | 1.37485  | -1.95675 |
| H | -3.38466 | 2.79778  | -1.58634 |
| C | 0.79164  | 5.71555  | -1.74755 |
| C | 1.19027  | 2.50944  | 1.99862  |
| F | 0.38543  | 6.89755  | -1.10067 |
| F | 2.16901  | 5.78314  | -1.76634 |
| F | 0.32135  | 5.80576  | -3.02671 |
| F | 0.53657  | 1.44003  | 2.59747  |
| F | 1.34417  | 3.48213  | 2.96614  |
| F | 2.47387  | 2.07473  | 1.70619  |
| S | -1.13502 | -1.83371 | -1.2448  |
| O | 5.45275  | -4.51551 | -3.05627 |
| H | 5.81223  | -5.40171 | -3.32288 |
| H | 4.50545  | -4.66501 | -2.7876  |
| O | 6.62893  | -3.6877  | -0.84835 |
| H | 6.71151  | -2.69878 | -0.90828 |
| H | 6.22527  | -3.97957 | -1.74861 |
| O | 3.2332   | 5.29909  | 1.54725  |
| H | 3.00391  | 6.24178  | 1.20846  |
| H | 2.64401  | 5.13119  | 2.32993  |
| O | 2.63928  | 7.58869  | 0.38568  |
| H | 3.21362  | 7.50492  | -0.42174 |
| H | 1.7102   | 7.51811  | 0.03391  |

# **1m Cat.+4H<sub>2</sub>O(Toluene)**

Symbolic Z-matrix:

Charge = 0 Multiplicity = 1

|   |         |          |          |
|---|---------|----------|----------|
| C | 6.18318 | 0.75909  | -0.07401 |
| C | 5.31363 | -0.07193 | 0.64617  |
| C | 5.8422  | -0.87588 | 1.66375  |
| C | 7.20735 | -0.85188 | 1.95696  |
| C | 8.06514 | -0.02115 | 1.23277  |
| C | 7.54883 | 0.7848   | 0.21463  |
| H | 5.8025  | 1.39413  | -0.86812 |
| H | 5.18093 | -1.52766 | 2.22381  |
| H | 7.59925 | -1.47975 | 2.74882  |
| H | 9.12473 | -0.00015 | 1.45933  |
| H | 8.20802 | 1.43265  | -0.35199 |
| C | 4.27352 | -2.24633 | -1.08455 |
| C | 5.368   | -2.32312 | -1.95696 |
| C | 6.08759 | -3.51102 | -2.09989 |
| C | 5.71474 | -4.64389 | -1.37397 |
| C | 4.62174 | -4.57738 | -0.50579 |
| C | 3.90513 | -3.38831 | -0.35931 |

|   |          |          |          |
|---|----------|----------|----------|
| H | 5.66513  | -1.44641 | -2.52265 |
| H | 6.93295  | -3.55098 | -2.77715 |
| H | 6.26895  | -5.56885 | -1.48426 |
| H | 4.32482  | -5.45305 | 0.06026  |
| H | 3.05879  | -3.33629 | 0.31299  |
| C | 3.81469  | -0.10385 | 0.34728  |
| C | 3.52593  | -0.92029 | -0.96068 |
| N | 2.05849  | -1.06143 | -1.23558 |
| N | 3.20507  | 1.22689  | 0.17098  |
| H | 3.87679  | -0.28308 | -1.78051 |
| H | 3.29616  | -0.59966 | 1.16714  |
| H | 3.76734  | 1.85816  | -0.4024  |
| H | 1.82399  | -0.93838 | -2.22103 |
| C | 1.01935  | -1.36784 | -0.42243 |
| C | -1.56137 | -3.03094 | -0.16572 |
| C | -2.81717 | -3.55192 | 0.12564  |
| C | -3.98905 | -2.82983 | -0.08336 |
| C | -3.86065 | -1.5358  | -0.5778  |
| C | -2.61707 | -0.97567 | -0.85735 |
| C | -1.45112 | -1.72628 | -0.66019 |
| H | -0.68104 | -3.63278 | -0.00666 |
| H | -4.98089 | -3.25022 | 0.146    |
| H | -2.56364 | 0.04419  | -1.20877 |
| N | -0.2086  | -1.16397 | -1.03472 |
| H | -0.26032 | -0.4385  | -1.75191 |
| F | -5.95306 | -0.77358 | 0.2616   |
| F | -5.81933 | -1.20628 | -1.89678 |
| F | -4.80032 | 0.58267  | -1.07497 |
| F | -1.80091 | -5.66734 | 0.48285  |
| F | -3.02477 | -4.84129 | 2.13059  |
| F | -4.02727 | -5.58275 | 0.31232  |
| C | -5.0922  | -0.735   | -0.83058 |
| C | -2.91055 | -4.90486 | 0.72492  |
| C | 2.58105  | 1.90857  | 1.31651  |
| C | 1.36769  | 2.71097  | 0.84072  |
| C | 0.72338  | 2.31235  | -0.33203 |
| C | 0.86845  | 3.80807  | 1.54212  |
| C | -0.41531 | 2.97465  | -0.77211 |
| H | 1.15905  | 1.48988  | -0.87765 |
| C | -0.26411 | 4.47788  | 1.06885  |
| H | 1.34785  | 4.14994  | 2.45167  |
| C | -0.93212 | 4.07095  | -0.08204 |
| H | -1.81852 | 4.5915   | -0.4785  |
| H | 2.22561  | 1.13235  | 2.00438  |
| H | 3.26434  | 2.56488  | 1.87676  |
| C | -0.71893 | 5.70738  | 1.75928  |
| C | -1.10137 | 2.51622  | -2.00733 |
| F | -0.22667 | 6.86547  | 1.12382  |
| F | -2.08967 | 5.85152  | 1.72794  |
| F | -0.29093 | 5.78036  | 3.05416  |
| F | -0.44719 | 1.42618  | -2.5817  |
| F | -1.17406 | 3.49182  | -2.98062 |
| F | -2.4024  | 2.11318  | -1.77934 |
| S | 1.13232  | -1.91976 | 1.22591  |
| O | -5.63108 | -4.40854 | 3.03953  |
| H | -6.00822 | -5.29946 | 3.26221  |
| H | -4.67523 | -4.56151 | 2.80119  |
| O | -6.70467 | -3.5382  | 0.7815   |
| H | -6.78841 | -2.55007 | 0.84868  |

|   |          |          |          |
|---|----------|----------|----------|
| H | -6.36507 | -3.84922 | 1.69764  |
| O | -3.01592 | 5.38856  | -1.63671 |
| H | -2.77097 | 6.33296  | -1.32287 |
| H | -2.44749 | 5.19043  | -2.42736 |
| O | -2.38431 | 7.65996  | -0.45582 |
| H | -2.99954 | 7.54165  | 0.31652  |
| H | -1.47617 | 7.54869  | -0.0626  |

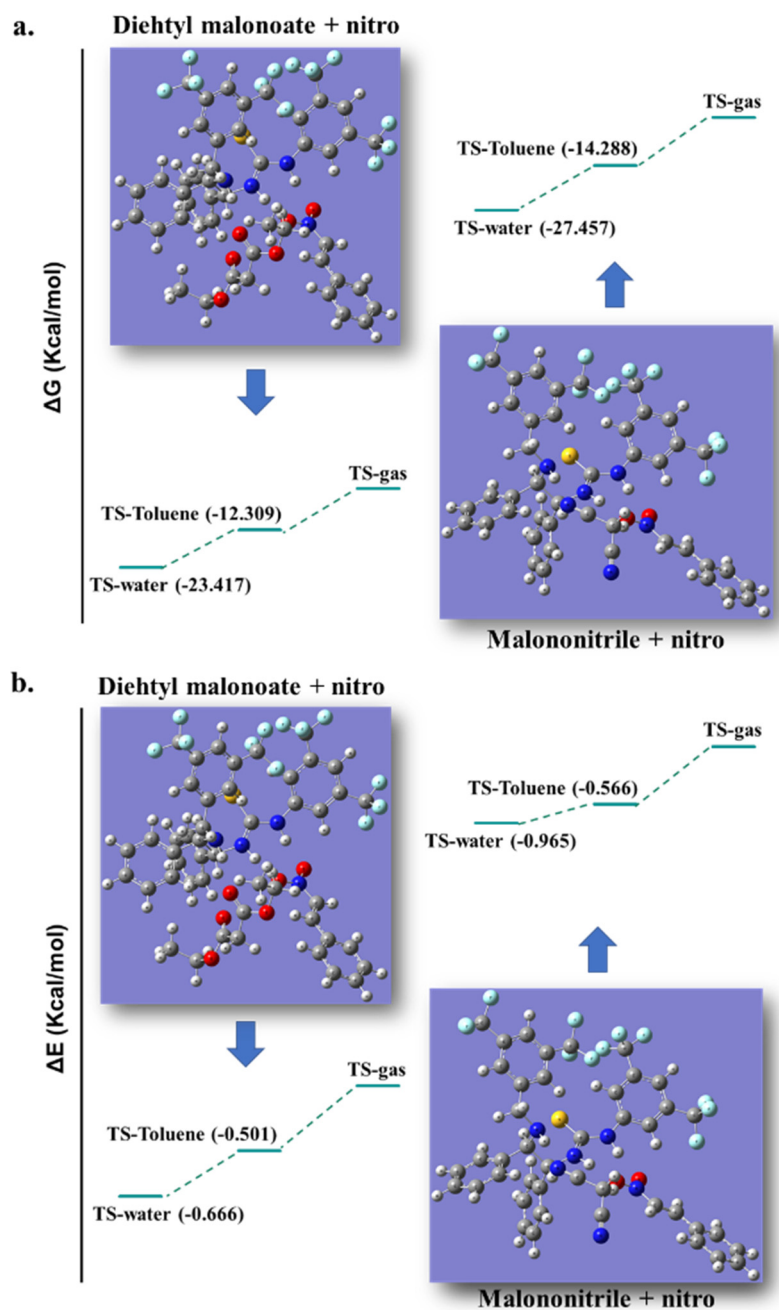

**Fig. 1.** DFT calculated solvent effects energy diagram for the Michael reaction using  $\beta$ -nitrostyrenes. (*R,R*)-1,2-diphenyleth-ylenediamine (DPEN)-thiourea catalyzed enantioselecti-ve Michael reaction calculated at the B3LYP/6-31G(d,p) level. a. expected relative free energy of Transition states in water and toluene solvents. b. expected thermal energy of Transition states in water and toluene solvents.

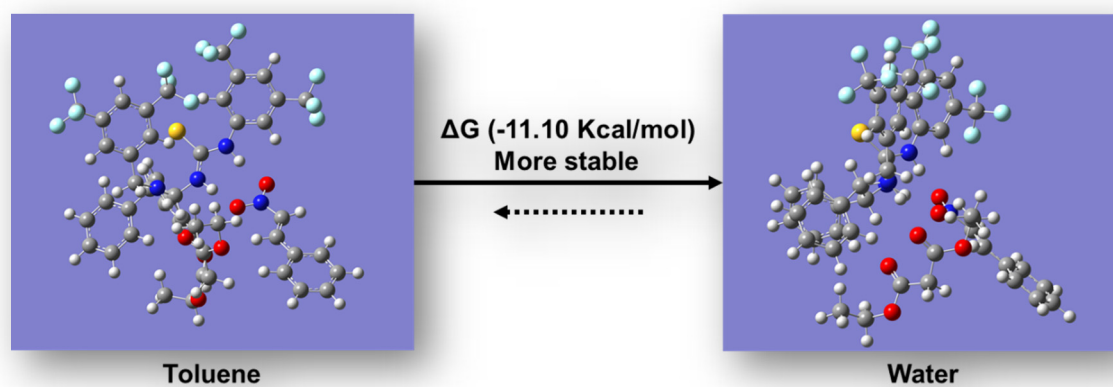

**Fig. 2.** Solvent effects on the Michael reaction of diethylmalonate to nitrostyrene.



## Copy of X-ray Diffraction(1m Catalyst)

X-ray diffraction patterns were recorded at room temperature by a Siemens X-ray diffractometer using CuK $\alpha$  radiation ( $\lambda = 1.54\text{\AA}$ ).

- (1) Equipment : Bruker, D8 ADVANCE
- (2) Step size ;  $0.02^\circ$
- (3) Range :  $5 \sim 90^\circ$
- (4) Target : Cu
- (5) X-Ray Generator : 40 Kv
- (6) Appearance : Solid
- (7) Chemical Formula:  $\text{C}_{32}\text{H}_{23}\text{F}_{12}\text{N}_3\text{S}$

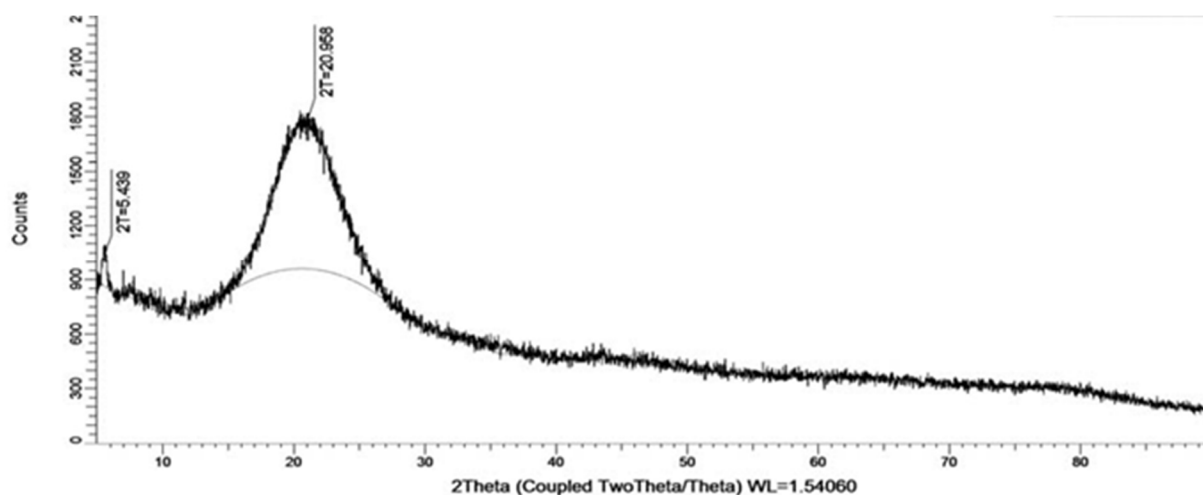

Supplement: s1 [file s1]
